# Supplementary material for: Self-resistance guided genome mining uncovers new topoisomerase inhibitors from myxobacteria
Source: PubMed Central journal article supplement — Chem Sci. 2018 May 3;9(21):4898–908. doi: 10.1039/c8sc01325j (PMC5982219; doi:10.1039/c8sc01325j), 2018-05-03
Supplement: SC-009-C8SC01325J-s001.pdf [file SC-009-C8SC01325J-s001.pdf]

# Self-resistance guided genome mining uncovers new topoisomerase inhibitors from myxobacteria

## Supplementary information

### Table of contents

|          |                                                                                                    |          |
|----------|----------------------------------------------------------------------------------------------------|----------|
| <b>1</b> | <b>MOLECULAR BIOLOGY PROTOCOLS</b> .....                                                           | <b>6</b> |
| 1.1      | CULTURE MEDIA USED IN THIS STUDY .....                                                             | 6        |
| 1.2      | ISOLATION OF GENOMIC DNA FROM MYXOBACTERIA .....                                                   | 7        |
| 1.3      | LIST OF OLIGONUCLEOTIDES USED IN THIS STUDY .....                                                  | 8        |
| 1.4      | LIGATION PROTOCOL USED IN THIS STUDY .....                                                         | 10       |
| 1.5      | LIST OF POLYMERASE CHAIN REACTION PROTOCOLS USED IN THIS STUDY .....                               | 11       |
| 1.5.1    | <i>Thermo scientific Taq Polymerase</i> .....                                                      | 11       |
| 1.5.2    | <i>Thermo scientific Phusion Polymerase</i> .....                                                  | 11       |
| 1.6      | <i>PYXIDICOCCLUS FALLAX AN D48</i> ANTIBIOTICS SENSITIVITY TESTS.....                              | 12       |
| 1.7      | TRANSFORMATION PROTOCOLS .....                                                                     | 13       |
| 1.8      | PLASMID VERIFICATION .....                                                                         | 13       |
| 1.8.1    | <i>Plasmid preparation via alkaline lysis</i> .....                                                | 13       |
| 1.8.2    | <i>Plasmid verification by restriction digestion</i> .....                                         | 14       |
| 1.9      | TRANSFORMATION OF <i>PYXIDICOCCLUS FALLAX AN D48</i> .....                                         | 14       |
| 1.9.1    | <i>Devising a reliable mutagenesis protocol for the myxobacterium p. fallax And48</i> .....        | 14       |
| 1.9.2    | <i>Single crossover homologous recombination in P. fallax And48</i> .....                          | 14       |
| 1.10     | ELABORATION OF THE PLASMIDS USED IN THIS STUDY .....                                               | 16       |
| 1.10.1   | <i>Single crossover inactivation plasmids for the Pyxidicycline cluster</i> .....                  | 16       |
| 1.10.2   | <i>Plasmids used for promotor exchange of the pcyA gene</i> .....                                  | 17       |
| 1.10.3   | <i>Creation of an orthogonal tetR based vector for a second single crossover integration</i> ..... | 19       |
| 1.10.4   | <i>Verification of plasmid integration into the myxobacterial strains</i> .....                    | 20       |
| 1.11     | PROTOCOLS FOR TRANSFORMATION ASSISTED RECOMBINATION (TAR CLONING) .....                            | 21       |
| 1.11.1   | <i>Stock solutions needed for TAR cloning of biosynthetic gene clusters</i> .....                  | 21       |
| 1.11.2   | <i>TAR cloning protocol adapted from Bylik et al. (2)</i> .....                                    | 21       |
| 1.11.3   | <i>Plasmid preparation from yeast strains</i> .....                                                | 22       |

|          |                                                                                                                   |                                           |
|----------|-------------------------------------------------------------------------------------------------------------------|-------------------------------------------|
| 1.12     | PROTOCOLS FOR $\lambda$ -RED PROPHAGE RECOMBINATION (RED E/T) .....                                               | 24                                        |
| <b>2</b> | <b>IN SILICO ANALYSIS OF THE PYXIDICYCLINE BIOSYNTHETIC GENE CLUSTER .....</b>                                    | <b>27</b>                                 |
| 2.1      | IN SILICO ANALYSIS OF THE PENTAPEPTIDE REPEAT PROTEIN .....                                                       | 27                                        |
| 2.2      | 3D MODELLING OF THE PENTAPEPTIDE REPEAT SELF-RESISTANCE PROTEIN VIA THE PHYRE <sup>2</sup> SERVER.....            | 27                                        |
| 2.3      | IN SILICO ANALYSIS OF THE PYXIDICYCLINE BIOSYNTHETIC GENE CLUSTER.....                                            | 28                                        |
| 2.4      | IDENTIFICATION OF KSA AND KSB .....                                                                               | 30                                        |
| 2.5      | IN SILICO ANALYSIS OF THE PCYJ PROTEIN .....                                                                      | 31                                        |
| 2.6      | IN SILICO ASSIGNMENT OF THE PYXIDICYCLINES' CYCLASE PROTEINS .....                                                | 32                                        |
| <b>3</b> | <b>ISOLATION AND CHARACTERIZATION OF THE PYXIDICYCLINES.....</b>                                                  | <b>33</b>                                 |
| 3.1      | PREPARATION OF SMALL SCALE BACTERIAL EXTRACTS FOR UHPLC-HRMS ANALYSIS .....                                       | 33                                        |
| 3.2      | PURIFICATION PROTOCOLS OF ALL PYXIDICYCLINE CLUSTER RELATED COMPOUNDS .....                                       | 35                                        |
| 3.2.1    | Isolation of Anthraquinone 296, 324 and 340 .....                                                                 | 35                                        |
| 3.2.2    | Isolation of Pyxidicycline A and B .....                                                                          | 38                                        |
| 3.3      | CRYSTALLIZATION PARAMETERS FOR THE PYXIDICYCLINE A AND B .....                                                    | 40                                        |
| 3.4      | CRYSTAL STRUCTURE PARAMETERS OBTAINED THROUGH SINGLE-CRYSTAL X-RAY DIFFRACTION EXPERIMENTS.....                   | 41                                        |
| 3.4.1    | Crystallographic data Pyxidicycline A .....                                                                       | 41                                        |
| 3.4.2    | Crystallographic data Pyxidicycline B .....                                                                       | 49                                        |
| 3.5      | NMR BASED STRUCTURE ELUCIDATION OF THE ANTHRAQUINONE PRECURSORS.....                                              | 56                                        |
| 3.6      | TANDEM MS BASED STRUCTURE ASSIGNMENT OF ANTHRAQUINONE 340 .....                                                   | 59                                        |
| 3.7      | TANDEM MS BASED ASSIGNMENT OF THE INCORPORATED DEUTERIUM ATOMS INTO PYXIDICYCLINE A .....                         | 60                                        |
| 3.8      | NMR BASED STRUCTURE ELUCIDATION OF THE PYXIDICYCLINES.....                                                        | 60                                        |
| 3.9      | COMPARATIVE EVALUATION OF THE DIFFERENT STRAINS PYXIDICYCLINE AND PYXIDICYCLINE PRECURSOR PRODUCTION<br>POTENTIAL | 63                                        |
| <b>4</b> | <b>BIOACTIVITY PROFILING OF THE ANTHRAQUINONES AND ITS PRECURSORS .....</b>                                       | <b>66</b>                                 |
| 4.1      | TOPOISOMERASE INHIBITION ASSAYS PERFORMED TO DETERMINE THE TARGET OF THE PYXIDICYCLINES .....                     | 67                                        |
| <b>5</b> | <b>NMR SPECTRA OF THE PYXIDICYCLINES AND THEIR PRECURSOR MOLECULES .....</b>                                      | <b>71</b>                                 |
| <b>6</b> | <b>REFERENCES .....</b>                                                                                           | <b>FEHLER! TEXTMARKE NICHT DEFINIERT.</b> |

## List of Figures

|                                                                                                                                                                          |    |
|--------------------------------------------------------------------------------------------------------------------------------------------------------------------------|----|
| Figure S 1: pCR2.1 vector for single crossover inactivation of the KS $\alpha$ on the pcyE gene.....                                                                     | 17 |
| Figure S 2: pSBtn5 vector used for placing the Pyxidicycline gene cluster under the control of the tn5 promotor.....                                                     | 18 |
| Figure S 3: pSBtn5 pcyA construct used for overexpression of p. fallax And48 Pyxidicycline cluster .....                                                                 | 18 |
| Figure S 4: pFPVan pcyA used for overexpression of the t2PKS cluster in Pyxidicoccus fallax An d48 .....                                                                 | 19 |
| Figure S 5: schematic view of the pFPtettn5 vector .....                                                                                                                 | 20 |
| Figure S 6: 3D structure homology model of the pentapeptide repeat protein putatively conferring topoisomerase self-resistance PcyT modelled by Phyre <sup>2</sup> ..... | 28 |
| Figure S 7: Identification of the KS $\alpha$ protein on the gene pcyE .....                                                                                             | 30 |
| Figure S 8: Identification of the KS $\beta$ protein on the gene pcyF .....                                                                                              | 31 |
| Figure S 9: NCBI conserved domain search hits in the PcyJ protein .....                                                                                                  | 31 |
| Figure S 10: Neighbour joining tree of the cyclases in the Pyxidicycline, Steffimycin and Oxytetracycline pathways .....                                                 | 32 |
| Figure S 11: UV absorption spectra of the Anthraquinone metabolites .....                                                                                                | 37 |
| Figure S 12: LCUV Chromatograms of the three isolated Anthraquinone metabolites .....                                                                                    | 37 |
| Figure S 13: High resolution masses of Anthraquinone 340,296 and 325 .....                                                                                               | 38 |
| Figure S 14: UV absorption spectra of Pyxidicycline A and B.....                                                                                                         | 39 |
| Figure S 15: LCUV Chromatograms of the two Pyxidicyclines for purity analysis.....                                                                                       | 40 |
| Figure S 16: High resolution masses of Pyxidicycline A and B .....                                                                                                       | 40 |
| Figure S 17: Structure formula of Anthraquinone 296 .....                                                                                                                | 57 |
| Figure S 18: Structure formula of Anthraquinone 340 .....                                                                                                                | 58 |
| Figure S 19: Structure formula of Anthraquinone 324 .....                                                                                                                | 58 |
| Figure S 20: MS <sup>2</sup> spectrum of Anthraquinone 340 with proposed gas phase reactions .....                                                                       | 59 |
| Figure S 21: LC-MS <sup>2</sup> CID-fragmentation pattern of d <sub>2</sub> labelled Pyxidicycline A .....                                                               | 60 |
| Figure S 22: Carbon numbering for NMR assignment purposes for Pyxidicycline A formate ester .....                                                                        | 61 |
| Figure S 23: Carbon numbering for NMR assignment purposes for Pyxidicycline B formate ester .....                                                                        | 62 |
| Figure S 24: E. coli DNA gyrase inhibition assay.....                                                                                                                    | 67 |
| Figure S 25: E. coli DNA topoisomerase IV inhibition assay .....                                                                                                         | 68 |
| Figure S 26: Human DNA topoisomerase I inhibition assay .....                                                                                                            | 69 |

|                                                                                                 |    |
|-------------------------------------------------------------------------------------------------|----|
| Figure S 27: <sup>1</sup> H NMR spectrum of Anthraquinone 296 in DMSO-d <sub>6</sub> .....      | 72 |
| Figure S 28: <sup>13</sup> C NMR spectrum of Anthraquinone 296 in DMSO-d <sub>6</sub> .....     | 73 |
| Figure S 29: DQF COSY NMR spectrum of Anthraquinone 296 in DMSO-d <sub>6</sub> .....            | 74 |
| Figure S 30: HSQC NMR spectrum of Anthraquinone 296 in DMSO-d <sub>6</sub> .....                | 75 |
| Figure S 31: HMBC NMR spectrum of Anthraquinone 296 in DMSO-d <sub>6</sub> .....                | 76 |
| Figure S 32: ROESY NMR spectrum of Anthraquinone 296 in DMSO-d <sub>6</sub> .....               | 77 |
| Figure S 33: <sup>1</sup> H NMR spectrum of Anthraquinone 341 in Acetone-d <sub>6</sub> .....   | 78 |
| Figure S 34: HSQC NMR spectrum of Anthraquinone 341 in Acetone-d <sub>6</sub> .....             | 79 |
| Figure S 35: <sup>1</sup> H NMR spectrum of Anthraquinone 324 in CDCl <sub>3</sub> .....        | 80 |
| Figure S 36: COSY NMR spectrum of Anthraquinone 324 in CDCl <sub>3</sub> .....                  | 81 |
| Figure S 37: HSQC NMR spectrum of Anthraquinone 324 in CDCl <sub>3</sub> .....                  | 82 |
| Figure S 38: HMBC NMR spectrum of Anthraquinone 324 in CDCl <sub>3</sub> .....                  | 83 |
| Figure S 39: <sup>1</sup> H NMR spectrum of Pyxidicycline A in formic acid-d <sub>2</sub> ..... | 84 |
| Figure S 40: COSY NMR spectrum of Pyxidicycline A in formic acid-d <sub>2</sub> .....           | 85 |
| Figure S 41: HSQC NMR spectrum of Pyxidicycline A in formic acid-d <sub>2</sub> .....           | 86 |
| Figure S 42: HMBC NMR spectrum of Pyxidicycline A in formic acid-d <sub>2</sub> .....           | 87 |
| Figure S 43: <sup>1</sup> H NMR spectrum of Pyxidicycline B in formic acid-d <sub>2</sub> ..... | 88 |
| Figure S 44: COSY NMR spectrum of Pyxidicycline B in formic acid-d <sub>2</sub> .....           | 89 |
| Figure S 45: HSQC NMR spectrum of Pyxidicycline B in formic acid-d <sub>2</sub> .....           | 90 |
| Figure S 46: HMBC NMR spectrum of Pyxidicycline B in formic acid-d <sub>2</sub> .....           | 91 |
| Figure S 47: ROESY NMR spectrum of Pyxidicycline B in formic acid-d <sub>2</sub> .....          | 92 |

## List of Tables

|                                                                                                      |    |
|------------------------------------------------------------------------------------------------------|----|
| Table S 1 : Comprehensive list of culture medium recipes used for fermentation of myxobacteria ..... | 6  |
| Table S 2: List of all oligonucleotides used in this study .....                                     | 9  |
| Table S 3: Taq DNA Polymerase PCR program .....                                                      | 11 |
| Table S 4: Phusion DNA Polymerase PCR program .....                                                  | 12 |
| Table S 5: Phusion DNA Polymerase PCR program for long PCR products and long oligonucleotides .....  | 12 |
| Table S 6: Table of all open reading frames belonging to the putative pyxidicycline cluster .....    | 28 |

|                                                                                                                                                                                  |    |
|----------------------------------------------------------------------------------------------------------------------------------------------------------------------------------|----|
| Table S 7: Crystal data and structure refinement for Pyxidicycline A formate ester (sh3817) ....                                                                                 | 41 |
| Table S 8: Atomic coordinates ( $\times 10^4$ ) and equivalent isotropic displacement parameters ( $\text{\AA}^2 \times 10^3$ ) for Pyxidicycline A formate ester (sh3817).....  | 42 |
| Table S 9: Bond lengths [ $\text{\AA}$ ] and angles [ $^\circ$ ] for Pyxidicycline A formate ester (sh3817).....                                                                 | 43 |
| Table S 10: Anisotropic displacement parameters ( $\text{\AA}^2 \times 10^3$ ) for Pyxidicycline A formate ester (sh3817).....                                                   | 48 |
| Table S 11: Hydrogen coordinates ( $\times 10^4$ ) and isotropic displacement parameters ( $\text{\AA}^2 \times 10^3$ ) for sh3817 .....                                         | 49 |
| Table S 12: Crystal data and structure refinement for Pyxidicycline B formate ester (sh3811) ...                                                                                 | 49 |
| Table S 13: Atomic coordinates ( $\times 10^4$ ) and equivalent isotropic displacement parameters ( $\text{\AA}^2 \times 10^3$ ) for Pyxidicycline B formate ester (sh3811)..... | 50 |
| Table S 14: Bond lengths [ $\text{\AA}$ ] and angles [ $^\circ$ ] for Pyxidicycline B formate ester (sh3811).....                                                                | 51 |
| Table S 15: Anisotropic displacement parameters ( $\text{\AA}^2 \times 10^3$ ) for Pyxidicycline B formate ester (sh3811).....                                                   | 55 |
| Table S 16: Tabulated NMR data of the Anthraquinone 296 in DMSO- $d_6$ .....                                                                                                     | 57 |
| Table S 17: Tabulated NMR data of the Anthraquinone 340 in Acetone- $d_6$ .....                                                                                                  | 58 |
| Table S 18: Tabulated NMR data of the Anthraquinone 324 in Chloroform- $d$ .....                                                                                                 | 58 |
| Table S 19: Tabulated NMR data of Pyxidicycline A formate ester .....                                                                                                            | 61 |
| Table S 20: Tabulated NMR data of Pyxidicycline B formate ester.....                                                                                                             | 62 |
| Table S 21: Comparative peak area analysis measured in [cts x min] of the Pyxidicyclines and its precursors in all generated producer strains .....                              | 63 |

# 1 Molecular biology protocols

## 1.1 Culture media used in this study

Table S 1 : Comprehensive list of culture medium recipes used for myxobacterial fermentation in this study

| CTT medium                                                |                                          |               |               |
|-----------------------------------------------------------|------------------------------------------|---------------|---------------|
| Amount                                                    | Ingredient                               | Concentration | Supplier      |
| 10 g/L                                                    | Bacto Casiton                            | -             | BD            |
| 10 ml/L                                                   | Tris solution                            | 1 M           | Sigma Aldrich |
| 1 ml/L                                                    | KH <sub>2</sub> PO <sub>4</sub> solution | 0.1 M         | Sigma Aldrich |
| 10 ml/L                                                   | MgSO <sub>4</sub> solution               | 0.8 M         | Grüssing      |
| Dissolved in milliq. water pH adjusted to 7.6 with 1N KOH |                                          |               |               |
| TS-6 medium                                               |                                          |               |               |
| Amount                                                    | Ingredient                               | Concentration | Supplier      |
| 6g/L                                                      | Bacto Trypton                            | -             | BD            |
| 10 ml/L                                                   | Tris solution                            | 1 M           | Sigma Aldrich |
| 4 g/L                                                     | Starch (soluble)                         | -             | Roth          |
| 10 ml/L                                                   | MgSO <sub>4</sub> solution               | 0.8 M         | Grüssing      |
| Dissolved in milliq. water pH adjusted to 7.6 with 1N KOH |                                          |               |               |
| YM – Medium                                               |                                          |               |               |
| Amount                                                    | Ingredient                               | Concentration | Supplier      |
| 5 g/L                                                     | Bacto Pepton Phyton                      | -             | BD            |
| 10 g/L                                                    | Glucose                                  | -             | Roth          |
| 3 g/L                                                     | Bacto Malt extract                       | -             | BD            |
| 3 g/L                                                     | Bacto Yeast Extract                      | -             | BD            |
| 1 g/L                                                     | CaCl <sub>2</sub>                        | -             | Sigma Aldrich |
| 1 g/L                                                     | MgSO <sub>4</sub> x 7H <sub>2</sub> O    | -             | Grüssing      |
| 1 mL/L                                                    | KHPO <sub>4</sub> solution               | 0.1 M         | Sigma         |
| 10 mM                                                     | TRIS                                     | -             | Sigma Aldrich |
| Dissolved in milliq. water pH adjusted to 7.5 with 1N KOH |                                          |               |               |
| SC leucine dropout – Medium                               |                                          |               |               |
| Amount                                                    | Ingredient                               | Concentration | Supplier      |
| 6.8 g/L                                                   | Yeast Nitrogen base                      | -             | Sigma Aldrich |
| 20 g/L                                                    | Glucose                                  | -             | Roth          |
| 5 g/L                                                     | Leucine dropout amino acid mix           | -             | Sigma Aldrich |
| Dissolved in milliq. water                                |                                          |               |               |
| YPAD – Medium                                             |                                          |               |               |

| Amount                                                    | Ingredient                            | Concentration | Supplier      |
|-----------------------------------------------------------|---------------------------------------|---------------|---------------|
| 10 g/L                                                    | Yeast extract                         | -             | BD            |
| 10 g/L                                                    | Phytopeptone                          | -             | BD            |
| 20 g/L                                                    | Glucose                               | -             | Roth          |
| 100 mg/L                                                  | Adenine hemisulfate                   | -             | Sigma Aldrich |
| Dissolved in milliq. water                                |                                       |               |               |
| YMS 20 – Medium                                           |                                       |               |               |
| Amount                                                    | Ingredient                            | Concentration | Supplier      |
| 5 g/L                                                     | Bacto Pepton Phyton                   | -             | BD            |
| 10 g/L                                                    | Glucose                               | -             | Roth          |
| 20 g/L                                                    | Soluble Starch                        | -             | Roth          |
| 3 g/L                                                     | Bacto Malt extract                    | -             | BD            |
| 3 g/L                                                     | Bacto Yeast Extract                   | -             | BD            |
| 1 g/L                                                     | CaCl <sub>2</sub>                     | -             | Sigma Aldrich |
| 1 g/L                                                     | MgSO <sub>4</sub> x 7H <sub>2</sub> O | -             | Grüssing      |
| 1 mL/L                                                    | KHPO <sub>4</sub> solution            | 0.1 M         | Sigma         |
| 10 mM                                                     | TRIS                                  | -             | Sigma Aldrich |
| Dissolved in milliq. water pH adjusted to 7.5 with 1N KOH |                                       |               |               |
| LB medium                                                 |                                       |               |               |
| Amount                                                    | Ingredient                            | Concentration | Supplier      |
| 10 g/L                                                    | Tryptone                              | -             | Roth          |
| 5 g/L                                                     | Yeast extract                         | -             | Roth          |
| 5 g/L                                                     | NaCl                                  | -             | Grüssing      |
| Dissolved in milliq. water pH adjusted to 7.2 with 1N KOH |                                       |               |               |

For the preparation of Agar, 7.5 g/L agar is added to the medium before autoclaving, Soft agar is prepared by addition of 4 g/L agar to the medium broth.

## 1.2 Isolation of genomic DNA from myxobacteria

To isolate bigger amounts of higher quality genomic DNA e.g. to amplify the PCR products for TAR cloning, the alkaline lysis gDNA preparation protocol is used.

- 1) Spin down 50ml of fresh myxobacterial culture 6000 rcf 10 min
- 2) Discard the supernatant
- 3) Wash the cells once with SET Buffer, centrifuge at 6000 rcf 10 min
- 4) Resuspend cell pellet in 5ml SET Buffer

- 5) Add 100  $\mu$ L of Lysozym (50 mg/ml in ddH<sub>2</sub>O) stock solution as well as 50 $\mu$ L RNase A (10 mg/ml in ddH<sub>2</sub>O) stock solution
- 6) Add 300  $\mu$ L Proteinase K solution ( 10 mg/ml 50 mM Tris 1mM CaCl<sub>2</sub>) invert several times and add 600 $\mu$ L 10% SDS solution
- 7) Incubate at 55°C for 2 h, invert every 15 min
- 8) Add even Volume (6ml) of Phenol/Chloroform/Isoamylalcohol (25:24:1) and swing the tube for 60 min at 5 rpm
- 9) Centrifuge the mixture at 6000 rcf for 5 min at room temperature
- 10) Transfer the upper phase into a new tube using a cut end 1ml tip
- 11) Add even Volume (6ml) of Phenol/Chloroform/Isoamylalcohol (25:24:1) and swing the tube for 60 min at 5 rpm
- 12) Centrifuge the mixture at 6000 rcf for 5 min at room temperature
- 13) Transfer the upper phase into a new tube using a cut end 1ml tip
- 14) Add even Volume (6ml) of Chloroform/Isoamylalcohol (24:1) and swing the tube for 60 min at 5 rpm
- 15) Centrifuge the mixture at 6000 rcf for 5 min at room temperature
- 16) Transfer the upper phase into a new tube using a cut end 1ml tip
- 17) Add 1/10 of the total volume of 3M NaOAc solution pH 5.5 and mix well by inverting several times
- 18) Add 2.5 Volumes of ice cold ethanol (100% technical purity, -20°C) and invert the tube several times, DNA precipitation should be visible as a cotton like fog in the tube
- 19) Spool the DNA on a sealed Pasteur pipette
- 20) Rinse the DNA with 70% Ethanol (cold , -20°C)
- 21) Air dry the DNA for at least 15 minutes (Dry DNA will become completely translucent)
- 22) Resuspend dried DNA in 0.5 ml of ddH<sub>2</sub>O and keep the Eppendorf tube at room temperature for 24 Hours
- 23) Check the genomic DNA on an agarose gel

### **1.3 List of oligonucleotides used in this study**

Oligonucleotides used in this study are ordered from Sigma Aldrich. Nucleotides with a length below 40 bp are ordered as desalted primers, while all longer oligonucleotides were ordered as RP-HPLC purified primers.



Table S 2: List of all oligonucleotides used in this study

| Primer name                  | Primer sequence                                         |
|------------------------------|---------------------------------------------------------|
| FP_pSBtn5verif_in            | CCTTTGGACAGCAAGCGAAC                                    |
| FP_pSBtn5verif_out           | CACTCATTAGGCACCCAGG                                     |
| And48_pcyA_PromEx_verif_fwd  | ATTCATTGGAGTGAGGGC                                      |
| And48_pcyA_PromEx_verif_rev  | GATGTA CTGCAGCGGATGA                                    |
| And48_pcyJ_PromEx_verif_fwd  | TGTGATGGATGGACTTCGGC                                    |
| And48_pcyJ_PromEx_verif_rev  | CGAAGATGAGGACGTTGCCT                                    |
| FP_pFPtettn5verif_in         | GCCTCTTCGCTATTACGCCA                                    |
| FP_pFPtettn5verif_out        | CACTCATTAGGCACCCAGG                                     |
| FP pCR2.1 in                 | CCTCTAGATGCATGCTCGAGC                                   |
| FP pCR2.1 out                | GGATCCACTAGTAACGGCCG                                    |
| FP t2PKS KS1 SCveriv fwd     | CGGCAACTACTAACCCACA                                     |
| FP t2PKS KS1 SCveriv rev     | CATGAAGTCGGTGGGGTTGA                                    |
| And48 KS1 SC Primer rev      | AAGACCTCCCTCGTAGTCCG                                    |
| And48 KS1 SC Primer fwd      | GGACCGGTACATCCAGTTCG                                    |
| t2PKS_Synthlig_tn5fusion_fwd | AGACAGGATAAGGAGGTACAGCATATGTCCGAAACCGCATCCTTC           |
| t2PKS_Synthlig_tn5fusion_RC  | GAAGGATGCGGTTTCGGACATATGCTGTACCTCCTTATCCTGTCT           |
| t2PKS_AMPdepSynth_rev        | TCAGAATTCTCATGCTCCTGTGGGGATG                            |
| tn5_Promotor_primer_Xbal     | AGTCTAGAGTAATACGACTCACTATAGGG                           |
| t2PKS_Synthlig_tn5fusion_fwd | AGACAGGATAAGGAGGTACAGCATATGTCCGAAACCGCATCCTTC           |
| t2PKS_Synthlig_tn5fusion_RC  | GAAGGATGCGGTTTCGGACATATGCTGTACCTCCTTATCCTGTCT           |
| t2PKS_AMPdepSynth_rev        | TCAGAATTCTCATGCTCCTGTGGGGATG                            |
| tn5_Promotor_primer_Xbal     | AGTCTAGAGTAATACGACTCACTATAGGG                           |
| t2PKS_Synthlig_tn5fusion_fwd | AGACAGGATAAGGAGGTACAGCATATGTCCGAAACCGCATCCTTC           |
| p15A_rev                     | GTGCACCTCTGGCTCACCGAC                                   |
| p15A_fwd                     | TCTGTCCCTCCTGTTCAAGT                                    |
| VanR_pCLY_fwd                | GACTCCAACGTCAAAGGGCGATCAGTCGGCGCAATGCTCCA               |
| VanR_pCLY_RC                 | TGGAGCATTGCGCCGACTGATCGCCCTTGACGTTGGAGTC                |
| pCLY_mx8_RC                  | GCGTACCCGAAGTTCACCGAAAATTCAGAAGAAGGCGATAGAAGGCC         |
| pCLY_mx8_fwd                 | CGCCTTCTATCGCCTCTTGACGAGTCTTCTGAATTTTCGGTGAATTCGGGTACGC |
| And48_t2PKS_PCR1_rev         | CGGGCTGGAAGTAGGTGATG                                    |
| And48_t2PKS_PCR2_fwd         | CGCAACCAGGAGTTCGTGAT                                    |
| And48_t2PKS_PCR2_rev         | GCACGTATGAAATGGCGTCC                                    |
| And48_t2PKS_PCR3_fwd         | CACTCCCTTACGTACCTGG                                     |
| And48_t2PKS_PCR4_rev         | AACCACTGGGAGATGTGCTG                                    |
| And48_t2PKS_PCR5_fwd         | GGAGGCCTACAAGGAATCCG                                    |
| And48_PGyrA_fwd              | TTCATGCGGAAGTAGCGAGGCGGAAGGGCCCTCATTTTTTC               |
| And48_PGyrA_rev              | AAGATGGGAGGCCGGGGGACGCCATGAGCTCTGGAAGTGTTCGGA           |
| And48_t2PKS_PCR3_rev         | AAAACCCTGGCGTTACCAACCTCCCTACCCCGTAGTC                   |
| And48_t2PKS_PCR4_fwd         | GACTACGGGGTAGGGGAGGTTGGGTAACGCCAGGGTTTT                 |
| And48_t2PKS_PCR5_rev         | GAAAATGAGGGCCCTTCCGCTCGCTACTTCCGCATGAA                  |
| And48_t2PKS_PCR6_fwd         | TCCGAACACTTCCAGAGCTCATGGCTCCCGGCCTCCCATCTT              |
| And48_t2PKS_PCR6_rev         | CGCTCGACAAGCGCGCCGTCGGTTTCAGCGGCTCTTCC                  |
| And48_t2PKS_resOperon_mx8    | GGAAGAGCCGCTGAACCGGACGGCCGCGCTTGTGAGCG                  |

|                     |                                                                                              |
|---------------------|----------------------------------------------------------------------------------------------|
| mx8_attB_up         | CGAGGAGTACGGGACTTGAAC                                                                        |
| mx8_attB_down       | CGGATAGCTCAGCGGTAGAG                                                                         |
| mx8_attP_up         | CATGGTCGACGCCTACACGAC                                                                        |
| mx8_attP_down       | GGCTTGTGCCAGTCAACTGCG                                                                        |
| CmR_Ampdep_fwd      | GATGGCGCAGGGGATCAAGATCTGATCAAGAGACAGGATAAGGAGGTACAGCATCTGAACAGG<br>AGGGACAGCTG               |
| CmR_Ampdep_rev      | CACCTGCGACGCGGACAGGTGGCGTGGGTCTTCTGGGTGATGCAGGCAATCAACATTTACGCCC<br>CGCCCTGCCACTCATCGCAGTA   |
| CmR_Mucono_fwd      | AGCAGAGCGCGCGTCCCAGAAGGGCCCGTCCGCCATCCCCACAGGAGCATGAGCCTGAACAGG<br>AGGGACAGCTG               |
| CmR_Mucono_rev      | TCGCCCCGAGCGGCCTCGGTACGTACGGCGAACAGCATGGGTGGGTTCTCCGGTAGGGTTACGC<br>CCCGCCCTGCCACTCATCGCAGTA |
| CmR_Cyclase_fwd     | TCACCCACGCGATGGCCGAGAACGCCTGACCCCTACCGGAGAACCCACCCCTGAACAGGAGGGA<br>CAGCTG                   |
| CmR_Cyclase_rev     | TCAGGGGCCGAGAGCGGAACGCCGCGTGTGTCCGGGAAGCTTCCGTCCATTTACGCCCGCC<br>CTGCCACTCATCGCAGTA          |
| CmR_T7A1_fusion_fwd | TACTGCGATGAGTGGCAGGGCGGGCGTAAATCCATTACGCCAAGCTTATCA                                          |
| CmR_T7A1_fusion_rev | TGATAAGCTTGGCGTAATGGATTTACGCCCCCCTGCCACTCATCGCAGTA                                           |
| T7A1_glycohydr_rev  | GCGGCGCTTCTTCTGCGGAAGCGCGGTGGGCTTGGACAGGGCTTTGGTCATATGTACACCTCTCGA                           |
| TipA_CmR_fwd        | TGG<br>CCGATTACCCGTGACGCCATCATCGCGAACGCGGAGCGGCACGGCGAGTAGCTGAACAGGAGG<br>GACAGCTG           |

## 1.4 Ligation protocol used in this study

Ligations performed in this study are done with Thermo scientific T4 ligase.

### T4 DNA Ligase mix:

2µL vector DNA (1h dephosphorylated using FastAP (shrimp alkaline phosphatase, Thermo scientific))

2 – 6.5 µL insert DNA (triple the molar amount of the vector DNA)

1 µL T4 DNA ligase buffer

0.5 µL T4 DNA ligase

to 10µL ddH<sub>2</sub>O

The ligase mix is incubated at 16°C for 15-24h and 1-5 µL ligation mix are subsequently electroporated into *E. coli* DH10β using standard *E. coli* electroporation protocol.

## 1.5 List of polymerase chain reaction protocols used in this study

### 1.5.1 Thermo scientific Taq Polymerase

#### Taq Polymerase Protocol:

2 $\mu$ L NH<sub>4</sub>SO<sub>4</sub> Buffer

(Alternatively 2 $\mu$ L KCl Buffer)

2 $\mu$ L MgCl<sub>2</sub> solution (25mM)

4 $\mu$ L dNTP's (2mM)

4 $\mu$ L 50% Glycerol

1 $\mu$ L Primer fwd and rev (50mM)

0.2  $\mu$ L Taq DNA Polymerase

1 $\mu$ L gDNA Template (~50 ng/ $\mu$ L)

4.3 $\mu$ L ddH<sub>2</sub>O

#### Taq Polymerase cyler program:

Table S 3: Taq DNA Polymerase PCR program

| Step                        | Time [min:s] | Temperature [°C] |
|-----------------------------|--------------|------------------|
| <b>Initial denaturation</b> | 4:00         | 95               |
|                             | 0:30         | 95               |
| <b>Cycle, repeat 30x</b>    | 0:15         | 63               |
|                             | 1:20         | 72               |
| <b>Final elongation</b>     | 10           | 72               |
| <b>Store</b>                | forever      | 8                |

### 1.5.2 Thermo scientific Phusion Polymerase

#### Phusion Polymerase Protocol:

5 $\mu$ L GC Buffer

2.5 $\mu$ L dNTP's (2mM)

1.25 $\mu$ L DMSO

0.5 $\mu$ L Primer fwd and rev (100mM)

0.2  $\mu$ L Phusion DNA Polymerase

0.5µL gDNA Template (~50 ng/µL)

14.55µL ddH<sub>2</sub>O

**Phusion Polymerase cycler program:**

Table S 4: Phusion DNA Polymerase PCR program

| Step                 | Time [min:s] | Temperature [°C] |
|----------------------|--------------|------------------|
| Initial denaturation | 4:00         | 95               |
|                      | 0:30         | 98               |
| Cycle, repeat 30x    | 0:15         | 63               |
|                      | 1:20         | 72               |
| Final elongation     | 10           | 72               |
| Store                | forever      | 8                |

Table S 5: Phusion DNA Polymerase PCR program for long PCR products and long oligonucleotides

| Step                 | Time [min:s] | Temperature [°C] |
|----------------------|--------------|------------------|
| Initial denaturation | 4:00         | 95               |
|                      | 0:30         | 98               |
| Cycle, repeat 2x     | 0:15         | 61.5             |
|                      | 6:00         | 68               |
| Cycle, repeat 30x    | 0:30         | 98               |
|                      | 3:00         | 66               |
| Final elongation     | 6:00         | 68               |
|                      | 10           | 72               |
| Store                | forever      | 8                |

## 1.6 *Pyxidicoccus fallax* An d48 antibiotics sensitivity tests

In order to determine available resistance markers for genetic manipulation of An d48 the strain's resistance towards different antibiotics was assayed by adding respective antibiotic concentrations to an YM medium agar plate. The strain shows resistance against 12 µg/ml tetracycline and partial resistance against 25 µg/ml zeocin. On the other hand the strain is sensitive to 50 µg/ml kanamycin, 25 µg/ml

chloramphenicol and 12 µg/ml oxytetracycline. For practical reasons kanamycin and oxytetracycline is chosen as a second resistance marker, since the pCR2.1 Topo and pSWU22 vectors will be used. The pCR2.1 Topo is based on kanamycin. The pSWU22 vector harbors a tetracycline resistance cassette as well as a multiple cloning site and has no overlap with the pCR2.1 Topo backbone as overlap could lead to wrong backbone-backbone recombinations.

## 1.7 Transformation protocols

### Transformation protocol *E. coli DH10β* TOPO TA kit cloning

- 1) Take competent *E. coli DH10β* from -80°C on ice
- 2) Mix competent cells with pCR2.1 TOPO reaction mixture  
(0.5µL salt solution, 0.5µL pCR2.1 TOPO vector (linearized), 1-5 µL PCR product cleaned by gel electrophoresis incubated for 10 minutes)
- 3) Electroporate the cells at 1250 V, 25 µF, 200 Ohm and 1mm in a standard electroporation cuvette (100 µL).
- 4) Add 500 µL of fresh LB medium
- 5) Incubate on a shaker at 37°C for 1h
- 6) Plate on LB Kan50 Agar and incubate the plates overnight at 37°C
- 7) Pick around 6 clones and cultivate them for plasmid preparation via alkaline lysis

## 1.8 Plasmid verification

### 1.8.1 Plasmid preparation via alkaline lysis

- 1) Centrifuge 2-4 ml *E. coli* culture in LB medium in a 2ml Eppendorf tube (13000-15000 rpm table centrifuge 2 min)
- 2) Resuspend the Pellet in 250 µl Solution I (Store at +4°C after addition of RNase A)
- 3) Incubate for 5 min approximately
- 4) Add 250 µL Solution II, mix well via inverting the Eppendorf tube
- 5) Add 250 µL Solution III (fast to avoid denaturing the supercoiled plasmid DNA), mix well via inverting the Eppendorf tube
- 6) Centrifuge for 30 minutes at 13000-15000 rpm with a table centrifuge

- 7) Transfer the supernatant into fresh 1.5 ml Eppendorf tubes
- 8) Add 850µL analytical grade Isopropanol
- 9) Centrifuge the sample for 30 min at 13000-15000 rpm, possibly at 4°C
- 10) Remove the supernatant and add 350 µL EtOH to wash the plasmid DNA
- 11) Centrifuge the mixture for 5 min and remove the ethanolic supernatant, this step can be repeated to clean up the DNA
- 12) Dry the pellet by inverting the tube on a clean piece of paper or at 65°C (make sure to avoid residual EtOH in your plasmid preparations in order to avoid re-precipitation of the vector over time)
- 13) Add 50 µL of nuclease free H<sub>2</sub>O and resuspend the Pellet at 55°C for 1h.

### **1.8.2 Plasmid verification by restriction digestion**

- 1) Find a restriction Enzyme that cuts one time on the vector backbone and one time on the insert.
- 2) Mix 8.5µL Plasmid from alkaline lysis with 1µL restriction enzyme buffer and 0.5 µL enzyme.
- 3) Incubate for 3-4 h
- 4) Verify the bands on agarose gel (0.8 %) by gel electrophoresis

## **1.9 Transformation of the myxobacterial strains used in this study**

### **1.9.1 Devising a reliable mutagenesis protocol for the myxobacterium *p. fallax* And48**

Electro competence of the myxobacterium *p. fallax* And48 was assayed with the plasmid pMycoMar-Kan that confers kanamycin resistance via the defective transposon *magellan-4*<sup>1</sup>. Following optimization of electroporation parameters, a reliable protocol was created that allowed site directed mutagenesis via single crossover homologous recombination (detailed information in the supplementary information).

### **1.9.2 Single crossover homologous recombination in *P. fallax* And48**

Since Silica membrane prepared plasmid (GeneJET Plasmid Miniprep kit, Thermo scientific) transposon mutagenesis of And48 yields more than 400 clones per 500 µg plasmid while standard alkaline lysis led to clone numbers inferior to 10, all manipulations of *Pyxidicoccus fallax* And48 are done using silica membrane purified plasmid.

### **Transformation protocol**

- 1) Centrifuge 2ml of an And48 culture in YM Medium at OD<sub>600</sub> of approx. 0.3 at 8000 rpm for 2 minutes at a table centrifuge.
- 2) Wash the residual cell pellet 2 times with 500 µL autoclaved ddH<sub>2</sub>O and discard the supernatant.
- 3) Resuspend cells in 50µL of ddH<sub>2</sub>O, add 5 µL of plasmid solution (prepared from E. coli with Thermo Scientific Miniprep Kit) at a conc. of 0.3-0.4 ng/µL and transfer the solution into an electroporation cuvette.
- 4) Electroporation at 675 V, 400 Ohms, 25µF and 1mm cuvette settings for optimum electroporation efficiency.
- 5) Flush out the cells with 1 mL fresh YM medium, transfer the Cell suspension into a 2ml Eppendorf tube.
- 6) Incubate the Cells for 5h on a Shaker thermostated to 37°C at 300 rpm.
- 7) Plating the cells on Kan50 YM Agar after mixing the cell suspension with 3 ml of Kan50 YM Softagar.
- 8) Slightly red, spherical clones appear after 7-12 Days in the 30°C incubator.

### **1.9.3 Transformation protocol for *M. xanthus* DK1622**

The transformation protocol for *M. fulvus* SBMx132 was elaborated from CTT medium cultures, since CTT medium leads to growth in perfect suspension. This is a prerequisite for efficient electrotransformation of myxobacteria.

### **Transformation protocol**

- 9) Centrifuge 2ml of an Mx132 culture in CTT Medium at OD<sub>600</sub> of approx. 0.3 at 8000 rpm for 2 minutes at a table centrifuge.
- 10) Wash the residual cell pellet 2 times with 500 µL autoclaved ddH<sub>2</sub>O and discard the supernatant.
- 11) Resuspend cells in 50µL of ddH<sub>2</sub>O, add 5 µL of plasmid solution (prepared from E. coli with Thermo Scientific Miniprep Kit) at a conc. of 0.3-0.4 ng/µL and transfer the solution into an electroporation cuvette.
- 12) Electroporation at 675 V, 400 Ohms, 25µF and 1mm Cuvette Settings for optimum electroporation efficiency.
- 13) Flush the cells out with 1 mL fresh CTT medium, transfer the Cell suspension into a 2ml Eppendorf tube.
- 14) Incubate the Cells for 5h on a Shaker thermostated to 37°C at 300 rpm.

- 15) Plating the cells on Kan50 CTT Agar after mixing the cell suspension with 3 ml of Kan50 CTT Softagar.
- 16) Clones appear after 5-7 Days in the 30°C incubator.

#### **1.9.4 Transformation protocol for *S. aurantiaca* DW 4/3-1**

The transformation protocol for *S. aurantiaca* DW4/3-1 was elaborated from TS-6 medium cultures, since TS-6 medium leads to growth in perfect suspension.

##### **Transformation protocol**

- 17) Centrifuge 2ml of a *S. aurantiaca* DW4/3-1 culture in TS-6 Medium at OD<sub>600</sub> of approx. 0.3 at 8000 rpm for 2 minutes at a table centrifuge.
- 18) Wash the residual cell pellet 2 times with 500 µL autoclaved ddH<sub>2</sub>O and discard the supernatant.
- 19) Resuspend cells in 50µL of ddH<sub>2</sub>O, add 5 µL of plasmid solution (prepared from *E. coli* with Thermo Scientific Miniprep Kit) at a conc. of 0.3-0.4 ng/µL and transfer the solution into an electroporation cuvette.
- 20) Electroporation at 650 V, 400 Ohms, 25µF and 1mm cuvette Settings for optimum electroporation efficiency.
- 21) Flush the cells out with 1 mL fresh TS-6 medium, transfer the cell suspension into a 2ml Eppendorf tube.
- 22) Incubate the Cells for 5h on a Shaker thermostated to 37°C at 300 rpm.
- 23) Plating the cells on Kan50 TS-6 Agar after mixing the cell suspension with 3 ml of Kan50 TS-6 Softagar.
- 24) Clones appear after 10-14 Days in the 30°C incubator.

## **1.10 Elaboration of the plasmids used for single crossover integration**

### **1.10.1 Single crossover inactivation plasmids for the pyxidicycline cluster**

In order to disrupt the pyxidicycline cluster, ca. 1 kb single crossover homology arms targeting the KSα on the *pcyE* gene and the cyclase on *pcyC* were amplified from An d48 genomic according to the protocol for gDNA isolation from gram-negative bacteria (DNA Puregene Core Kit A, Quiagen) and ligated into pCR2.1-TOPO (TOPO-TA cloning, Thermo scientific TOPO-TA Kit). Single crossover integration was achieved by electro-transformation of An d48 using a protocol elaborated in this work (section S 1.9) and resulting mutants were checked for correct integration by PCR using the TAQ PCR protocol (section S 1.5).



For single crossover inactivation of the pyxidicycline secondary metabolite cluster a pCR 2.1 vector from the TOPO-TA cloning kit (TOPO-TA cloning KIT, Thermo scientific) was used. Amplification of the 1 kb homology fragments was done with TAQ Polymerase (Thermo scientific) from And48 gDNA according to the TAQ polymerase amplification protocol (section S 1.5). The vector containing the KS $\alpha$  encoded on *pcyE* insert was verified by restriction digestion with the restriction Enzyme NcoI that cuts once on the pCR2.1 backbone and once on the KS $\alpha$  homology arm insert and analogously the vector containing homology to the cyclase *pcyC* was verified with NaeI. Two *E. coli* clones whose plasmids show the correct restriction pattern are selected for plasmid isolation with the plasmid isolation kit (GeneJET Plasmid Miniprep kit, Thermo scientific).

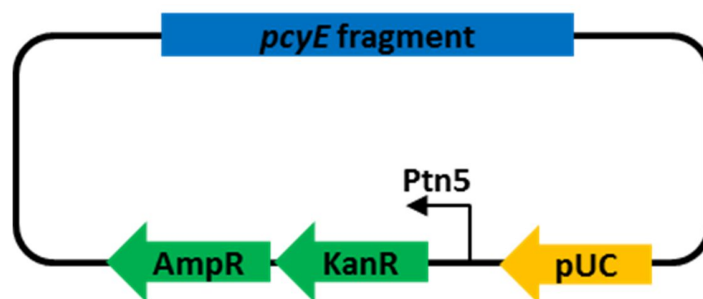

Figure S 1: pCR2.1 vector from the pTOPO Kit carrying a 1kb homology arm for single crossover inactivation of the KS $\alpha$  on the *pcyE* gene.

### 1.10.2 Plasmids used for promotor exchange of the *pcyA* gene

The first utilized construct was designed in order to exchange the alleged native promotor against a tn5 promotor. This promotor was chosen as it was known to successfully drive the kanamycin resistance gene expression in *M. xanthus*. The plasmids used for overexpression of the minimal PKS operon are called pSBtn5 and pFPVan, consisting of a pCR2.1 vector backbone from the TOPO-TA cloning kit (Thermo scientific, U.S.A) and a tn5 promotor or a vanillate promotor repressor system. The plasmids created in this section serve as tool to control the transcription and translation of operon 1 of the pyxidicycline cluster via a heterologous promotor.

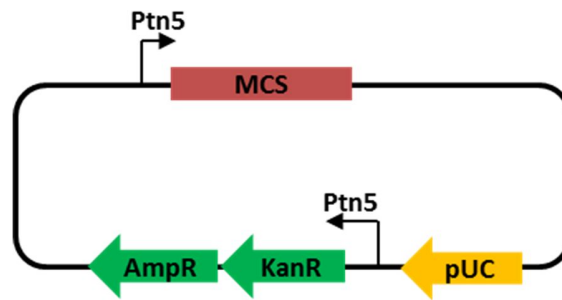

Figure S 2: pSBtn5 vector used for placing the pyxidicycline gene cluster under the control of the *tn5* promoter

The first 1-1.5 kb of a biosynthetic assembly line are inserted into the pSBtn5 with the restriction enzymes *EcoRI* and *NdeI* that are introduced during PCR with restriction sites on the primers. *NdeI* is necessary as it contains the start codon and usage of *EcoRI* as a complementary enzyme facilitates cloning as both enzymes are working in Thermo scientific 1x Orange buffer. In order to get good cloning efficiency and avoid vector relegation clones it is necessary to dephosphorylate the vector backbone thoroughly before ligation. This is done by utilizing the FastAP shrimp phosphatase (Thermo Scientific) which is also compatible with Thermo Scientific 1xO buffer. Electroporation of *Pyxidicoccus fallax* An d48 is done according to the devised protocol (see section S 1.9) with the assembled and purified pSBtn5 plasmid harboring the first gene of the type 2 PKS minimal PKS Operon. As this gene is called *pcyA*, this assembled plasmid will be called pSBtn5 *pcyA*.

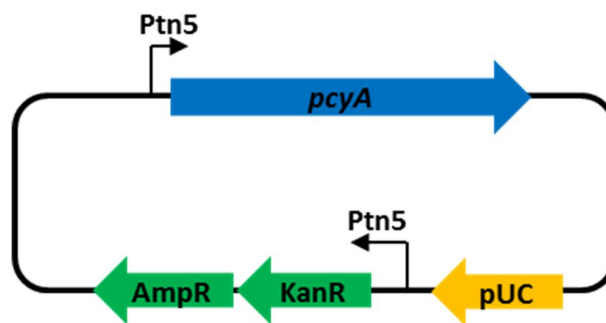

Figure S 3: pSBtn5 *pcyA* construct used for overexpression of *p. fallax* And48 pyxidicycline cluster

In order to avoid self-toxicity a second vector for single crossover insertion is created that harbors a promoter-repressor system inducible by vanillate. As the pCR2.1 Vector from the TOPO-TA Kit (Thermo scientific) works well for single crossover insertions of foreign DNA in *P. fallax* An d48, pCR2.1 is taken as a basis for this second vector system. The first gene of the t2PKS assembly line *pcyA* is amplified and the vanillate promoter-repressor system is added via overlap extension PCR using the Phusion PCR protocol

that also introduced NdeI as well as EcoRI restriction sites on the Primers (Table S 3). This PCR fusion product is ligated into the cut vector via TOPO-TA cloning (TOPO TA Kit, Thermo scientific).

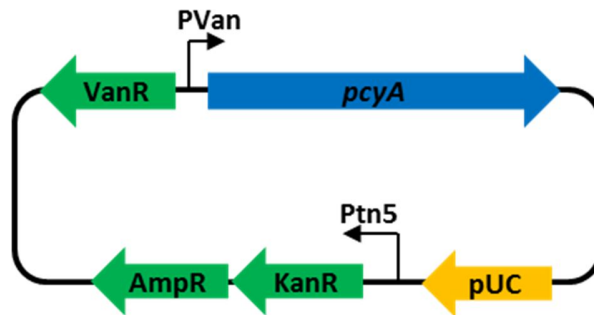

Figure S 4: pFPVan pcyA used for overexpression of the t2PKS cluster in *Pyxidicoccus fallax* An d48

Since both of these vectors are designed to work with the restriction enzymes EcoRI and NdeI, these gene cluster overexpression vectors can be utilized with the same PCR product into which NdeI and EcoRI restriction sites have been introduced.

### 1.10.3 Creation of an orthogonal tetR based vector for a second single crossover integration

In order to introduce a second promoter exchange into the bacterial chromosome of *Pyxidicoccus fallax* And48 pcyA :: pFPVan pcyA, a vector with an orthogonal resistance marker had to be created. As preliminary studies showed oxytetracycline to be a usable selection marker for *P. fallax* An d48 (section S 1.6), a vector harboring a p15A origin, the tetR gene as well as a fusion of a tn5 promoter to the pcyJ gene was created by standard restriction cloning based on the pSWU22 plasmid. This plasmid solely consists of the tetracycline exporter gene as resistance marker, a pUC origin and a multiple cloning site. The plasmid pSWU22 possesses a pUC origin which is not usable in this case as this might lead to single crossover integration of pUC :: pUC which is not desired. Therefore, the origin was exchanged against a p15A origin by restriction ligation using DraI and ApaI. This also leads to elimination of the NdeI cutting site on the plasmid backbone that would impede efficient use of the created plasmid later. Overlap extension PCR with the Phusion PCR protocol was subsequently used to amplify a fusion PCR product consisting of a tn5 promoter and the pcyJ gene harboring XbaI cutting sites on the primer sequences. Standard restriction cloning is subsequently used to insert the tn5-*pcyJ* fusion sequence into the modified pSWU22 plasmid to create the pFPtettn5 pcyJ vector.

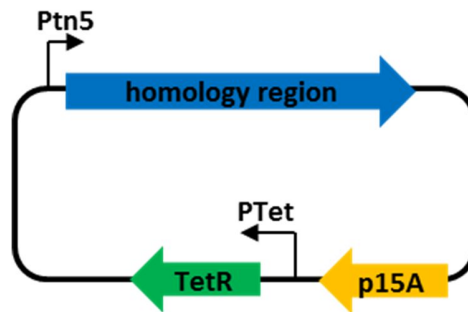

Figure S 5: schematic view of the pFPtettn5 vector used for creation of the *Pyxidicoccus fallax* An d48 *pcyA* :: pSBtn5 *pcyA*; *pcyJ* :: pFPtettn5 *pcyJ* (An d48 *pcy*) mutant

This allowed exchange of the native *pcyJ* promoter against a *tn5* promoter via single crossover homologous recombination in *Pyxidicoccus fallax* An d48 *pcyA* :: pFPVAn *pcyA* to obtain *Pyxidicoccus fallax* An d48 *pcyA* :: pFPVAn *pcyA*; *pcyJ* :: pFPtettn5 *pcyJ* (An d48 *pcy*). Single crossover integration of this plasmid into the *Pyxidicoccus fallax* An d48 *pcyA* :: pFPVAn *pcyA* strain was achieved by electroporation according to standard protocol (section S 1.9). As mentioned in the results, despite serious efforts we were unable to obtain integration clones of said plasmid into *Pyxidicoccus fallax* An d48 *pcyA* :: pSBtn5 *pcyA*. Plasmid integration verification was done by PCR using the TAQ PCR protocol (section 1.5).

#### 1.10.4 Verification of plasmid integration into the myxobacterial strains

Verification of the myxobacterial mutant clones is done by PCR with TAQ DNA Polymerase (Thermo Scientific). Therefore, genomic DNA from the myxobacterium is isolated with the Puregene Core Kit A (Quiagen) according to the protocol for gDNA isolation from gram-negative bacteria. The Taq DNA Polymerase master mix is prepared according to Table S 3. Primers are in all cases 2 primers that bind on the genomic DNA next to the homologous region if homologous recombination is used or next to the integration site if phage integrase based integration is used as well as two complementary primers that bind on the integrated vector. Therefore the appearance of PCR products of the right size proves homologous recombination to have occurred in the correct position.

## **1.11 Protocols for transformation assisted recombination (TAR cloning)**

### **1.11.1 Stock solutions needed for TAR cloning of biosynthetic gene clusters**

#### **PEG 3500 solution**

50 % [w/v] PEG 3500 (Sigma Aldrich) in milliq Water

#### **Single strand carrier DNA stock solution**

2 mg/ml salmon sperm DNA (Sigma Aldrich) in autoclaved milliq Water

Boil for 5 min at 95 °C and freeze aliquots of 500 µL, these aliquots can be used several times

#### **LiOAc stock**

1M LiOAc in TE Buffer

#### **TE Buffer**

1 mM EDTA

10 mM Tris

in milliq water

pH 8.0

### **1.11.2 TAR cloning protocol adapted from Bylik et al. <sup>2</sup>**

Previous day:

- 1) Inoculate the *S. cerevisiae* strain ATCC4004247 in 10 ml YPAD medium a 50 ml baffled flask over night at 30°C on a rotary shaker at 200 rpm. Simultaneous pre - warm one 300 ml baffled flask containing 50 ml of sterile YPAD medium to 30°C

TAR cloning day:

- 2) Determine approximate culture titer by measuring OD 600 of 10µL yeast culture in 1ml of milliq H<sub>2</sub>O, OD of 0.1 is approximately 10<sup>6</sup> yeast cells.
- 3) Add ca. 2 x 10<sup>8</sup> yeast cells to the pre warmed YPAD medium and incubate for 4h at 30°C 200 rpm.
- 4) Denature one aliquot of the SS carrier DNA stock solution for 5 min at 95°C and chill the solution on ice.

- 5) Harvest the yeast cells at 3000g for 5 min in a 50 ml falcon, wash twice with 25 ml sterile milliQ H<sub>2</sub>O and re suspend the cells in 1000 µL of sterile milliQ H<sub>2</sub>O.
- 6) Pipet aliquots of 200 µL of this solution in 1.5 µL Eppendorf tubes and remove the water by centrifuging at 3000g for 5 min
- 7) Add 360µL of transformation mix to the pellets and mix by pipetting up and down
- 8) Place the Eppendorf tubes (closed) in a floating device and heat shock the *S. cerevisiae* cells at 42°C for 30 min
- 9) Centrifuge at top speed for 30s and remove residual transformation mix by pipetting
- 10) Re suspend the pellet in 1ml of sterile milliQ H<sub>2</sub>O
- 11) Streak the cells on a SC leucine dropout agar plate and incubate the plate for 2-3 days
- 12) Pick the clones on a replica plate and select for positive clones via colony PCR
- 13) *S. cerevisiae* clones that give a positive colony PCR signal are grown in 5 mL of sterile SC leucine dropout medium and the plasmid is prepared from 2ml of *S. cerevisiae* culture

### 1.11.3 Plasmid preparation from yeast strains

Plasmids from TAR cloning for heterologous expression were prepared from the  $\Delta$  Leu2 leucine auxotrophy strain *S. cerevisiae* ATCC 4004247<sup>2</sup>.

Plasmid preparation follows the following scheme:

- 1) Centrifuge 1.5 ml *S. cerevisiae* culture in SC dropout medium in a 1.5 ml Eppendorf tube (13000-15000 rpm table centrifuge 2 min)
- 2) Re suspend the Pellet in 150 µl Solution I
- 3) Add 2ml of Zymolyase solution (10mg/ml) to each tube
- 4) Incubate for 30 min approximately
- 5) Add 150 µL Solution II, mix well via inverting the Eppendorf tube
- 6) Add 150 µL Solution III (fast to avoid denaturing the supercoiled plasmid DNA), mix well via inverting the Eppendorf tube
- 7) Centrifuge for 30 minutes at 13000-15000 rpm with a table centrifuge
- 8) Transfer the supernatant into fresh 1.5 ml Eppendorf tubes
- 9) Add 700µL analytical grade Isopropanol and mix well by inverting the tube several times
- 10) Centrifuge the sample for 30 min at 13000-15000 rpm, possibly at 4°C
- 11) Remove the supernatant and add 500 µL 70% EtOH to wash the plasmid DNA

- 12) Centrifuge the mixture for 5 min and remove the ethanolic supernatant, this step can be repeated to clean up the DNA
- 13) Dry the pellet by inverting the tube on a clean piece of paper or at 65°C (make sure to avoid residual EtOH in your plasmid preparation in order to avoid re-precipitation of the vector over time)
- 14) Add 30 µL of nuclease free H<sub>2</sub>O and re suspend the pellet at 55°C for 1h.

## 1.12 TAR cloning based pyxidicycline gene cluster assembly

*Pxyidicoccus fallax* An d48 *pcyA* :: pFPVan *pcyA*, *pcyJ* :: pFPtetp15Atn5 *pcyJ* strain's genomic was prepared according to alkaline lysis genomic DNA preparation standard protocol for all further PCR reactions (section S 1.2). For naturally overlapping PCR fragments e.g. PCR2 and PCR3 the PCR product overlap necessary for TAR cloning was introduced by PCR, for non-overlapping fragments as PCR3 and PCR4, the overlap was introduced with the primer sequences (main text Figure 3 and Figure S 6). 25-30 Bp homology introduced through the primers are sufficient for recombination in yeast. Amplification of the cluster sequence was done by using the PCR program for long PCR products (section S 1.5.2). Co-transformation of the PCR products of the pyxidicycline cluster into the TAR yeast *S. cerevisiae* ATCC 4004247 is done at a total concentration of 25 pg x Number of nucleotides per PCR product to get an equimolar PCR product mix in the yeast transformation mix. The capture vector was designed to harbor all genes necessary for replication and auxotrophy selection in *S. cerevisiae* analogous to the vector described by Bylik et al.<sup>2</sup> The last fragment imperative for the heterologous expression of the pyxidicycline cluster in *Myxococcus xanthus* DK1622 is the Mx8 integrase prophage with the attP site that mediates stable and efficient integration of plasmids into the DK1622 chromosome's attB site<sup>3,1</sup>. This fragment also contains a kanamycin resistance cassette necessary for the latter selection of integration clones in *M. xanthus* DK1622. Furthermore this resistance is helpful during the retransformation of the constructs in *E. coli* as since it is located on a PCR product different of the one harboring the p15A origin - it helps to prevent selecting plasmids consisting only of the pCIY backbone as these would not confer kanamycin resistance. TAR cloning was done according to a protocol by Bylik et al.<sup>2</sup> that was slightly adapted (section S 1.11). Yeast clones appearing on leucine deficient medium were checked by PCR for a fragment of the *pcyE* gene by colony PCR. Clones that gave a positive result were prepared from yeast (Zymo Prep Kit, Zymo Research, U.S.A) and transformed into *E. coli* DH10β by electroporation. Plasmid preparation and plasmid digestion with the enzymes NdeI, BstEII and NotI were used to confirm the plasmid by restriction digestion. The vector pCIY pyxidicycline cluster was sequenced by Illumina sequencing at GMAK

(Brunswick, Germany). The sequence was proven correct except for a single nucleotide polymorphism that leads to a silent mutation in the ATP binding protein of the ABC transporter encoded on *pcyQ*. The plasmid is transformed into *M. xanthus* DK1622 and *S. aurantiaca* DW 4/3-1 according to standard protocol (section S 1.9.3 and 1.9.4). Correct integration via the Mx8 integrase was checked by PCR using the TAQ PCR protocol (section 1.5).<sup>1</sup>

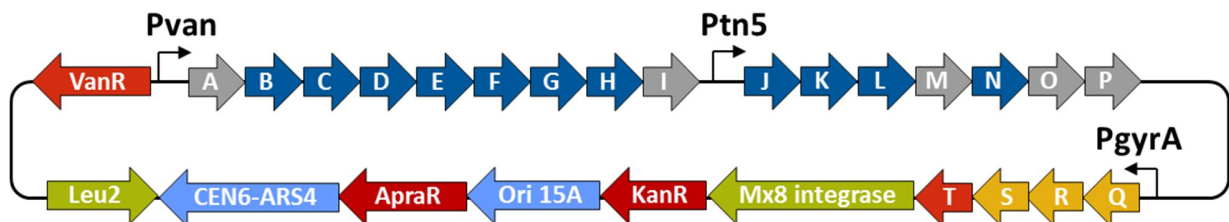

Figure S 6: Schematic view of the pClY Pyxidicycline vector. PKS type-II biosynthesis genes depicted in blue, regulation and resistance genes in red, exporter genes in orange, auxiliary genes for the cloning strategy in light green and orfs of unknown function in gray.

### 1.13 Protocols for $\lambda$ -Red prophage recombination (Red E/T)

The strain used for all  $\lambda$ -Red based recombination experiments was *E. coli* HS996 carrying the thermosensitive pSC101 Bad red gba plasmid. As the origin of this plasmid stops replicating at 37°C the strain has to be grown at 30°C for cryo cultures.

#### Incorporation of the target plasmid into the $\lambda$ -Red recombination strain

- 1) Inoculate 25 ml LB containing 12  $\mu$ g/ml oxytetracycline and grow the strain overnight at 30°C 200 rpm on a rotary shaker
- 2) Inoculate 20  $\mu$ L of the well grown *E. coli* overnight culture into a 2 ml Eppendorf tube with a punctured lid containing 1.5 ml LB with 12  $\mu$ g/ml oxytetracycline
- 3) Incubate the culture for 4h until OD reaches approx. 0.6
- 4) Mix target vector or Ligation mixture (ca.1-3 $\mu$ L) with competent *E. coli* and pipet the mixture into a Electroporation cuvette (100 $\mu$ L)
- 5) Electroporate the mixture at 1250V, 25 $\mu$ F, 200 Ohm, 1mm Cuvette
- 6) Add 1mL fresh sterile LB medium, incubate for 1h at 900 rpm 30°C in a 2ml Eppendorf tube with a punctured lid
- 7) Plate on LB Kan50 Otc12 Agar (provided the plasmid has kanamycin resistance, if not use appropriate antibiotic) and incubate the plates overnight at 30°C



- 8) Pick around 6 clones and cultivate them for plasmid preparation via alkaline lysis
- 9) Confirm the electroporated plasmid via restriction digestion

#### **Modification of plasmids via Red E/T**

- 1) Inoculate 25 ml LB containing 12 µg/ml oxytetracycline and 50 µg/ml Kanamycin and grow the strain overnight at 30°C 200 rpm on a rotary shaker
- 2) Inoculate 20 µL of the well grown *E. coli* overnight culture into a 2 ml Eppendorf tube with a punctured lid containing 1.5 ml LB with 12 µg/ml oxytetracycline and 50 µg/ml Kanamycin
- 3) Incubate the culture for 2h until OD reaches approx. 0.2 (sometimes longer incubation times are necessary)
- 4) Centrifuge the culture at 8000 x g for 5 minutes to pellet the cells
- 5) Wash the residual cell pellet 2 times with 1000 µL autoclaved milliQ H<sub>2</sub>O and discard the supernatant.
- 6) Re suspend the cell pellet in 50 µL autoclaved milliQ H<sub>2</sub>O and add the PCR product for modification
- 7) Electroporate the mixture at 1300V, 25µF, 600 Ohm, 1mm Cuvette
- 8) Add 1mL fresh sterile LB medium, incubate for 1h at 900 rpm 30°C in a 2ml Eppendorf tube with a punctured lid
- 9) Transfer the mixture into 50 ml LB Kan50 containing appropriate concentration of the antibiotic on the modification PCR product (in my case Chloramphenicol 25µg/ml) and incubate over night at 30°C
- 10) Prepare plasmid from this mixture via alkaline lysis
- 11) Electroporate the plasmid mix into *E. coli DH10β* according to the *E. coli DH10β* electroporation protocol and plate it on LB Kan50 Cm25
- 12) Pick around 4 clones and cultivate them for plasmid preparation via alkaline lysis
- 13) Confirm the electroporated plasmid via restriction digestion

The retransformation is necessary in order to avoid having clones harboring both plasmids (the modified and the unmodified one) in the same *E. coli* clone as well as to get rid of the pSC101 Bad Red gba plasmid

### **1.14 Elaboration of the Red E/T deletion plasmids utilized in this study**

To elucidate functions of the genes in the *pcy* cluster's operon two, genes were subsequently replaced by a chloramphenicol cassette on the heterologous expression construct. Therefore, the plasmid was transformed into the host strain *E. coli* HS996 harboring the pSC101BAD RedyβαA plasmid. Ca. 80 bp

homology arms to the neighboring regions of the genes selected for deletion via Red/ET were put on primers suited to amplify the chloramphenicol resistance cassette (Table S 2). PCR products were obtained using the Phusion PCR protocol (section S 1.5). Subsequent Red/ET replacement of the target genes led to the creation of deletion plasmids for the genes *pcyJ*, *pcyK* and *pcyL*. For overexpression of the *pcyO* gene, a T7A1 promotor was fused to the chloramphenicol resistance cassette equipped with 80 bp homology arms to replace the *pcyO* promotor region. Red/ET recombination was done according to standard linear to circular Red/ET (section S 1.13). The resulting plasmids were transformed into *Myxococcus xanthus* DK1622 via Mx8 mediated integration and the resulting strains termed *M. xanthus* DK1622 *pcy*  $\Delta$  *pcyJ*, *pcyK* and *pcyL*, depending on the deleted enzyme. The *M. xanthus* mutants were extracted according to standard protocol and analyzed by LC-MS. Pyxidicycline and anthraquinone production titers of *M. xanthus* DK1622 harboring the pCIY pyxidicycline cluster plasmid were compared to the titer of the strains harboring the *pcyJ*, *pcyK* and *pcyL* defective plasmids by LC-MS EIC peak area integration (Table S 21).

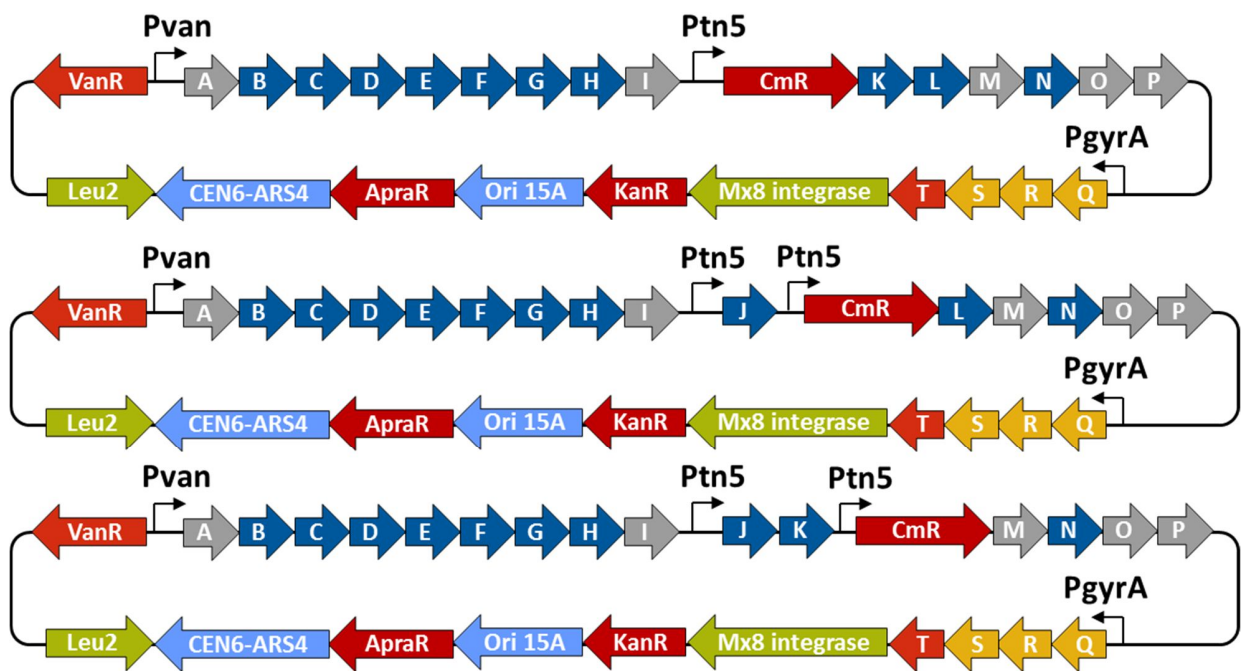

Figure S 7: Schematic view of the pCIY Pyxidicycline vector deletion constructs  $\Delta$  *pcyJ*, *pcyK* and *pcyL*. PKS type-II biosynthesis genes depicted in blue, regulation and resistance genes in red, exporter genes in orange, auxiliary genes for the cloning strategy in light green and orfs of unknown function in gray.

## **2 *In silico* analysis of the Pyxidicycline biosynthetic gene cluster**

### **2.1 *In silico* analysis of the pentapeptide repeat protein**

In order to analyze similarities of the found putative topoisomerase self-resistance proteins with self-resistance proteins against the gyrase poisons ciprofloxacin, albicidin and cystobactamid the pentapeptide repeat proteins were aligned via MUSCLE alignment. Alignment of the proteins in general shows them to have a rather low overall homology as the proteins are structural proteins with the relaxed consensus motif [S,T,A,V][D,N][L,F][S,T,R][G] for every repeat. Still the similarity of PcyT to McbG in *E. coli* and CysO in *C. velatus* indicates that this protein might have a similar function.<sup>4</sup>

### **2.2 3D modelling of the pentapeptide repeat self-resistance protein via the Phyre<sup>2</sup> server**

Since the 3D structure of pentapeptide repeat proteins is most likely more important than the primary sequence as these proteins are most likely structural proteins that mimic DNA to protect the hosts topoisomerases an *in silico* 3D structure prediction was done.

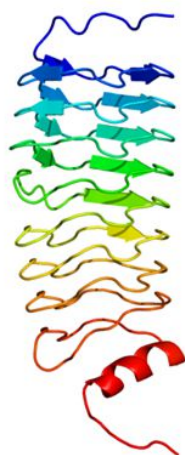

Figure S 8: 3D structure homology model of the pentapeptide repeat protein putatively conferring topoisomerase self-resistance PcyT modelled by Phyre<sup>2</sup><sup>5</sup>

The best matching proteins found by psi-blast on the Phyre<sup>2</sup> server to obtain a 3D homology model were *Xanthomonas albilineans* AlbG (100.0 confidence scoring; 29 % identity) and the quinolone resistance protein QNR from *Aeromonas Hydrophilia* (99.9 confidence scoring; 17 % identity). Both of these proteins confirm topoisomerase poison resistance and the devised homology model depicted in the picture above looks strikingly similar to described topoisomerase inhibitor resistance proteins.<sup>4</sup>

## 2.3 *In silico* analysis of the Pyxidicycline biosynthetic gene cluster

Table S 6: Table of all open reading frames belonging to the pyxidicycline (*pcy*) cluster with proposed function and closest homologue according to a blastp search against the nr (non-redundant protein sequences) protein database at NCBI

| Name        | Length [bp] | proposed function                                         | closest annotated homologue – organism of origin                | Identity [%] and length of alignment [AA] | Accession Nr. |
|-------------|-------------|-----------------------------------------------------------|-----------------------------------------------------------------|-------------------------------------------|---------------|
| <i>pcyA</i> | 1128        | precursor release from the acyl carrier protein           | acyl-CoA thioester hydrolase – multispecies                     | 27.7 / 361                                | WP_060519218  |
| <i>pcyB</i> | 852         | polyketide cyclisation (B-ring cyclisation)               | polyketide cyclase - <i>Streptomyces nogalater</i>              | 46.3 / 283                                | AAF01818      |
| <i>pcyC</i> | 963         | polyketide cyclisation (A-ring cyclisation)               | polyketide cyclase – <i>Streptomyces atratus</i>                | 32.9 / 325                                | WP_072488808  |
| <i>pcyD</i> | 798         | C9' type ketoreductase                                    | ketoacyl reductase – <i>Sorangium cellulosum</i>                | 69.1 / 259                                | WP_061624890  |
| <i>pcyE</i> | 1281        | ketoacyl synthase K $\alpha$ subunit                      | 3-oxoacyl-ACP synthase II – <i>Dendrosporobacter quericolus</i> | 56.0 / 425                                | SDL92203      |
| <i>pcyF</i> | 1242        | ketoacyl synthase K $\beta$ subunit (chain length factor) | 3-oxoacyl-ACP synthase II – <i>Pelosinus</i> sp.                | 37.7 / 414                                | WP_038670561  |
| <i>pcyG</i> | 237         | acyl carrier protein                                      | acyl carrier protein – <i>Terriglobus saanensis</i>             | 33.3 / 78                                 | WP_013566858  |

|             |      |                                    |                                                                       |             |              |
|-------------|------|------------------------------------|-----------------------------------------------------------------------|-------------|--------------|
| <i>pcyH</i> | 372  | 4'-phosphopanthenyl transferase    | holo-ACP synthase – <i>Sorangium cellulosum</i>                       | 61.5 / 122  | WP_061624886 |
| <i>pcyI</i> | 249  | -                                  | hypothetical protein – <i>Myxococcus fulvus</i>                       | 37.9 / 66   | WP_052771001 |
| <i>pcyJ</i> | 2088 | serine incorporation               | 4-coumarate-CoA ligase family protein – <i>Modestobater species</i>   | 37.3 / 542  | WP_082557217 |
| <i>pcyK</i> | 303  | heterocycle formation              | muconolactone delta-isomerase – <i>Acidovorax valerianellae</i>       | 32.5 / 83   | SDC81513     |
| <i>pcyL</i> | 717  | heterocycle formation              | polyketide cyclase – <i>Streptomyces species</i>                      | 29.3 / 232  | WP_053683051 |
| <i>pcyM</i> | 378  | -                                  | -                                                                     | -           | -            |
| <i>pcyN</i> | 762  | regulation                         | MerR family transcriptional regulator – <i>Myxococcus fulvus</i>      | 76.6 / 252  | WP_074955963 |
| <i>pcyO</i> | 2862 | -                                  | glycosyl hydrolase family 31 – <i>Mucilaginibacter paludis</i>        | 60.4 / 934  | WP_008504858 |
| <i>pcyP</i> | 720  | -                                  | hypothetical protein – <i>Mucilaginibacter paludis</i>                | 32.2 / 233  | WP_008504859 |
| <i>pcyQ</i> | 816  | export                             | ABC transporter, ATP binding protein – <i>Myxococcus xanthus</i>      | 93.0 / 272  | ABF90137     |
| <i>pcyR</i> | 783  | export                             | ABC transporter permease - <i>Myxococcus xanthus</i>                  | 90.7 / 259  | WP_011552893 |
| <i>pcyS</i> | 1035 | export                             | ABC transporter substrate binding protein - <i>Myxococcus xanthus</i> | 85.4 / 343  | WP_011552892 |
| <i>pcyT</i> | 639  | putative self-resistance mechanism | pentapeptide repeat containing protein – <i>Myxococcus fulvus</i>     | 70.3 / 209  | WP_046715273 |
| <i>orf1</i> | 1431 | -                                  | serine/threonine protein kinase – <i>Myxococcus xanthus</i>           | 58.5 / 470  | WP_011552901 |
| <i>orf2</i> | 993  | -                                  | hydrolase – <i>Myxococcus fulvus</i>                                  | 73.4 / 308  | WP_013941483 |
| <i>orf3</i> | 417  | -                                  | elongation factor GreAB – <i>Myxococcus hansupus</i>                  | 86.2 / 138  | WP_002640736 |
| <i>orf4</i> | 714  | -                                  | hypothetical protein – <i>Stigmatella aurantiaca</i>                  | 30.3 / 238  | WP_075011090 |
| <i>orf5</i> | 1047 | -                                  | hypothetical protein – <i>Archangium violaceum</i>                    | 30.8 / 156  | WP_043405726 |
| <i>orf6</i> | 2163 | -                                  | serine/threonine protein kinase – <i>Archangium gephyra</i>           | 38.8 / 707  | WP_047858246 |
| <i>orf7</i> | 375  | -                                  | -                                                                     | -           | -            |
| <i>orf8</i> | 1461 | -                                  | dihydropyrimidine dehydrogenase subunit A – <i>Myxococcus xanthus</i> | 86.2 / 486  | WP_011553928 |
| <i>orf9</i> | 4566 | -                                  | glutamate synthase large subunit – <i>Myxococcus virescens</i>        | 90.8 / 1520 | SDF16482     |

The native Pyxidicycline gene cluster will be accessible at GenBank under accession number MH048639 upon publication. All plasmid maps will be provided upon request.

## 2.4 Identification of KS $\alpha$ and KS $\beta$ *in silico*

Both ketosynthase proteins PcyE and PcyF in this assembly line are predicted to be 3-oxoacyl-ACP synthase 2 proteins. Therefore, sequence alignment is done in order to find out which of the sequences acts as the KS $\alpha$  protein and which protein acts as the KS $\beta$ . These functions can be identified via NCBI protein blast as, contrary to the KS $\beta$ , it possesses all catalytically active residues (see Figure S 9 and Figure S 10). In the PcyF amino acid sequence the catalytically active cysteine residue is mutated to arginine rendering it catalytically inactive.<sup>6</sup>

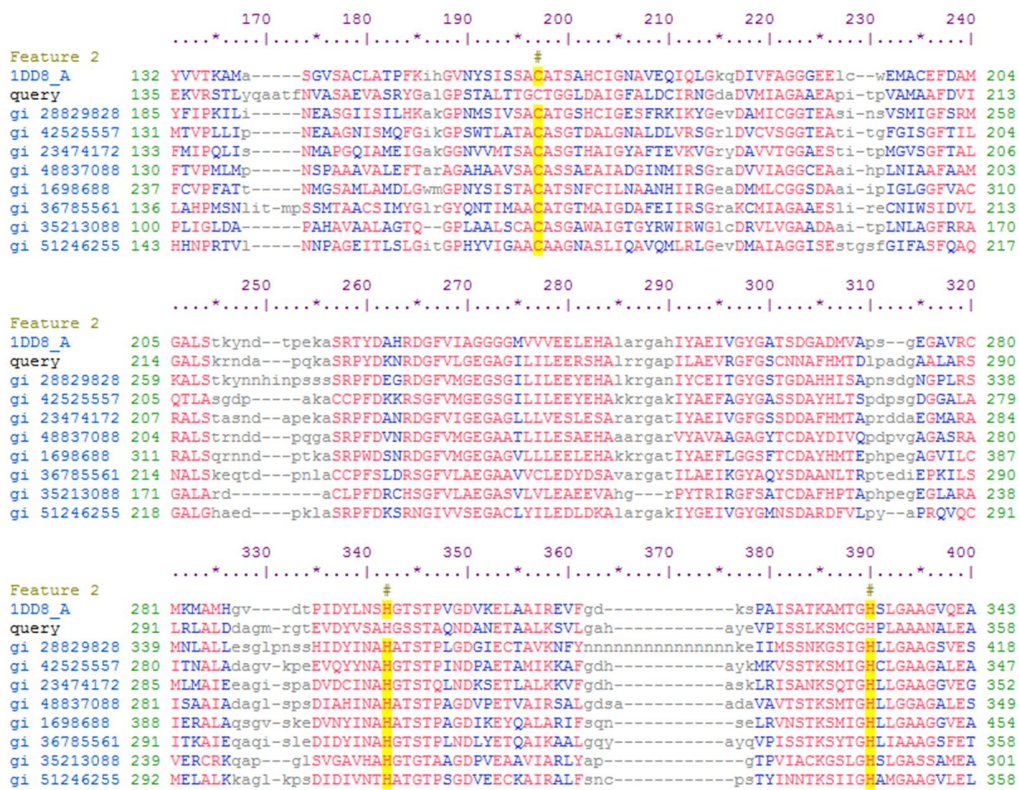

Figure S 9: Identification of the KS $\alpha$  protein on the gene pcyE via blast alignment against the non-redundant protein sequences collection (nr) on the NCBI protein server

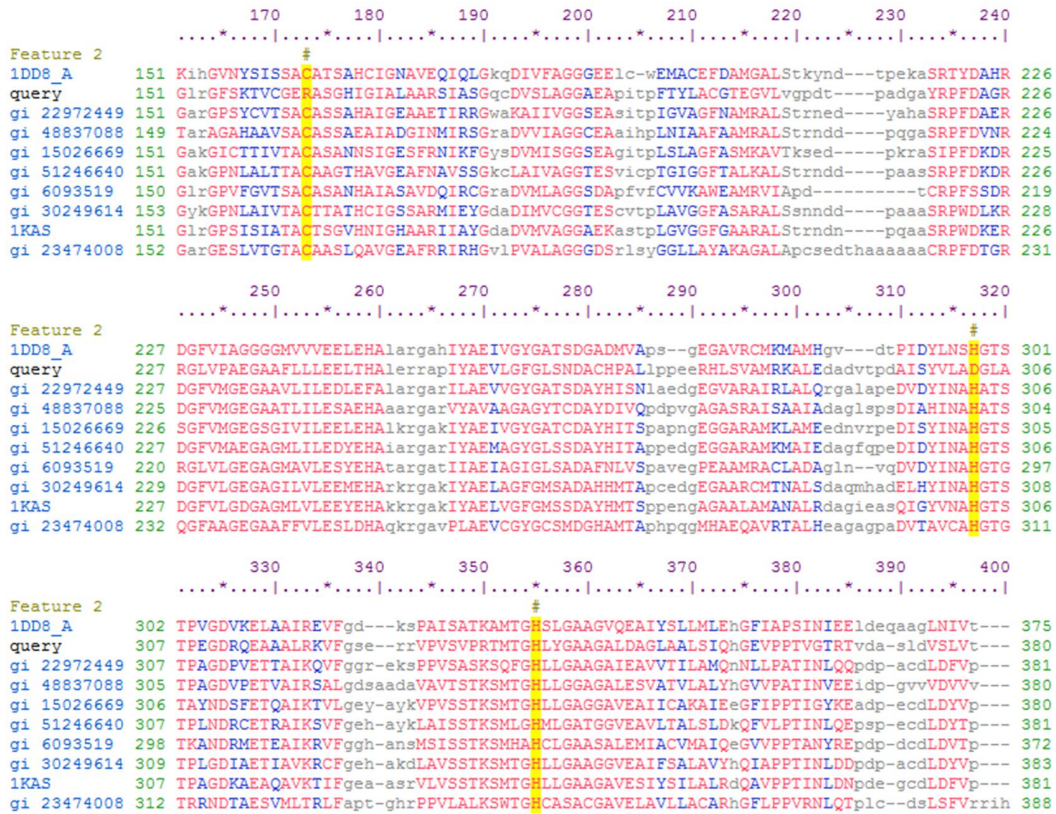

Figure S 10: Identification of the KSB protein on the gene pcyF via blast alignment against the non-redundant protein sequences collection (nr) on the NCBI protein server

## 2.5 In silico analysis of the PcyJ Protein

The PcyJ protein is responsible for amide bond formation between the polyketide intermediate of the pyridicyline biosynthesis and serine to form the D ring in pyridicycline A and B. Therefore the protein has to have acyl transfer activity to form an amide bond between serine and the polyketide precursor as well as hetero cyclisation activity.

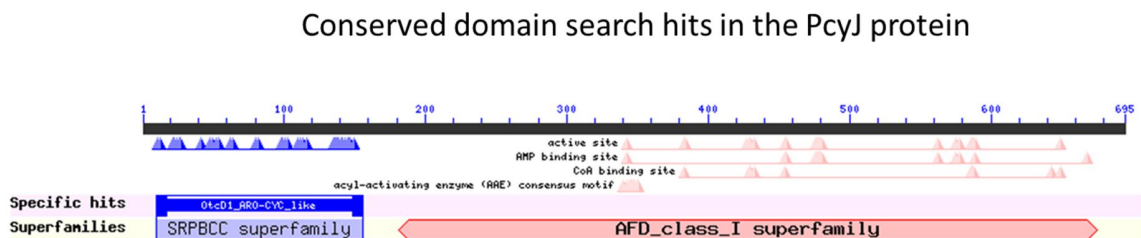

Figure S 11: NCBI conserved domain search hits in the PcyJ protein stating the di-domain nature of the protein as a AMP dependent synthetase/ligase – aromatase/cyclase fusion protein

Analysis of the PcyJ protein by NCBI conserved domain search <sup>7</sup> reveals an aromatase/cyclase domain (blue) putatively responsible for hetero cyclisation and an AMP-dependent synthetase and ligase function putatively responsible for amide bond formation.

## 2.6 *In silico* assignment of the pyxidicyclines' cyclase proteins

During maturation of the pyxidicyclines there are several cyclase like proteins involved to form the tetracene quinone like core structure. In order to assign the first and second ring cyclases which was not possible by knockout experiments we relied on protein alignment via the MUSCLE <sup>8</sup> algorithm to group the cyclase proteins into groups.

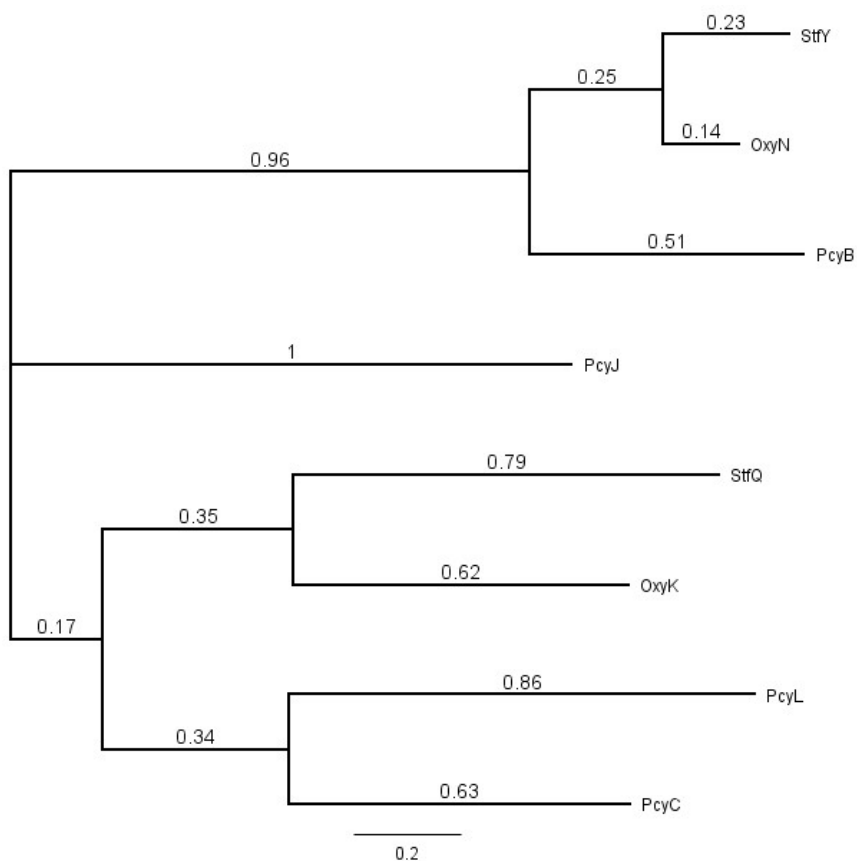

Figure S 12: Neighbour joining tree of the cyclases in the Pyxidicycline, Steffimycin and Oxytetracycline pathways based on MUSCLE alignment of the respective proteins

As one can see, PcyC and PcyL have homology to the first ring cyclase proteins OxyK and StfQ while the PcyB cyclase has homology to the second ring cyclases OxyN and StfY.<sup>9,10</sup> The specialized heterocycle forming protein PcyJ forms an outgroup in this cyclase *in silico* comparison. As we could show by knockout



experiments, PcyL and PcyJ are involved in the cyclisation of the fourth nitrogen containing ring (D ring) and since the third ring closure is spontaneous in these tetracycline like scaffolds,<sup>9</sup> this experiment strongly suggests PcyB to be the second ring (B ring) cyclase while PcyC is the first ring (A ring) cyclase.

## 3 Isolation and characterization of the pyxidicyclines

### 3.1 Bacterial fermentation procedures

Cultures for UPLC/high-resolution LC-MS analysis were grown in 300 ml shake flasks containing 50 ml of culture medium inoculated with 1 ml of pre culture. After inoculation the medium was supplemented with 2 % of sterile XAD-16 adsorber resin (Sigma Aldrich) suspension in water. Mutant strains are supplemented with concentrations of the respective antibiotics at concentrations as follows: Kanamycin 50 µg/ml, oxytetracyclin 12 µg/ml, ampicillin 100 µg/ml and apramycin 50 µg/ml. *Pyxidicoccus fallax* strain An d48 was grown in YM medium at 30 °C for 7-9 days using a orbitron shaker (Infors) at 160 rpm, likewise *Myxococcus xanthus* strain DK1622 was grown in CTT medium at 30°C for 5-7 days and *Stigmatella aurantiaca* DW4/3-1 was grown in TS-6 medium at 30°C for 11-14 days. Fermentation cultures of *Pyxidicoccus fallax* strain And48 *pcyA* :: pFPvan *pcyA*, *pcyJ* :: pFPtettn5 *pcyJ* used for isolation of the pyxidicyclines A and B were grown in 5 x 5 L shake flasks containing 2 L of YM medium each. Fermentation duration was 14 days post inoculation; inoculation was done with 50 ml of pre-culture and the medium was supplemented with 2 % of a sterile XAD-16 adsorber resin suspension in water. Fermentation cultures of *Pyxidicoccus fallax* strain And48 *pcyA* :: pSBtn5 *pcyA* used for isolation of the anthraquinone precursors anthraquinone 340, 324 and 296 were grown in 5x 5 L shake flasks containing 2 L of YM medium each. Fermentation duration was 10 days post inoculation; inoculation was done with 50 ml of pre-culture and the medium was supplemented with 2% of sterile XAD-16 adsorber resin suspension in water.

### 3.2 Preparation of small scale bacterial extracts for UHPLC-HRMS analysis

Pellet and cells were centrifuged at 6500 rcf in a 50 ml falcon centrifuge, the supernatant was decanted and the cell pellets were frozen at -20°C. The frozen cell pellet was transferred into a 100 ml

erlenmeyer flask and a magnetic stirrer added. 50 ml of acetone (fluka analytical grade, redistilled in house) were added onto the pellet and the mixture was stirred for 60 minutes on a magnetic stirrer. The acetone extract was left to settle in order to sediment cell debris and XAD resin before a second extraction step. The supernatant was filtered with a 125 micron folded filter keeping cell pellet and XAD-16 resin in the Erlenmeyer flask for the second extraction step. The residual pellet and XAD-16 resin is extracted again with 30 ml of distilled acetone for 60 min on a magnetic stirrer and filtered through the same folded filter. The combined extracts are transferred into a 100 ml round bottom flask. The acetone was evaporated on a rotary evaporator at 260 mbar and 40 °C water bath temperature. The residual water was evaporated at 20 mbar until the residue in the flask was completely dry. The residue was taken up in 550 µl of methanol (Chromasolv HPLC grade) and transferred into a 1.5 ml Eppendorf tube. This tube was centrifuged at 21500 rcf for 5 minutes to remove residual insolubilities such as salts, cell debris and XAD fragments.

### 3.3 Standardized UPLC-MS and UPLC-MS<sup>2</sup> Conditions

All measurements were performed on a Dionex Ultimate 3000 RSLC system using a Waters BEH C<sub>18</sub> column (50 x 2.1 mm, 1.7 µm) equipped with a Waters VanGuard BEH C<sub>18</sub> 1.7 µm guard column. Separation of 1 µl sample (Crude extract 1/5 dilutions in methanol, section S 3.2) was achieved by a linear gradient from (A) H<sub>2</sub>O + 0.1 % FA to (B) ACN + 0.1 % FA at a flow rate of 600 µL/min and a column temperature of 45 °C. Gradient conditions were as follows: 0 – 0.5 min, 5% B; 0.5 – 18.5 min, 5 – 95% B; 18.5 – 20.5 min, 95% B; 20.5 – 21 min, 95 – 5% B; 21-22.5 min, 5% B. UV spectra were recorded by a DAD in the range from 200 to 600 nm. The LC flow was split to 75 µL/min before entering the Bruker Daltonics maXis 4G hr-qTOF mass spectrometer using the Apollo II ESI source. Mass spectra were acquired in centroid mode ranging from 150 – 2500 m/z at a 2 Hz full scan rate. Mass spectrometry source parameters were set to 500V as end plate offset; 4000V as capillary voltage; nebulizer gas pressure 1 bar; dry gas flow of 5 l/min and a dry temperature of 200°C. Ion transfer and quadrupole settings were set to Funnel RF 350 Vpp; Multipole RF 400 Vpp as transfer settings and Ion energy of 5eV as well as a low mass cut of 300 m/z as Quadrupole settings. Collision cell was set to 5.0 eV and pre pulse storage time was set to 5 µs. Spectra acquisition rate was set to 2Hz. Calibration of the maXis4G qTOF spectrometer was achieved with sodium formate clusters before every injection to avoid mass drifts. All MS analyses were acquired in the presence of the lock masses C<sub>12</sub>H<sub>19</sub>F<sub>12</sub>N<sub>3</sub>O<sub>6</sub>P<sub>3</sub>, C<sub>18</sub>H<sub>19</sub>O<sub>6</sub>N<sub>3</sub>P<sub>3</sub>F<sub>2</sub> and C<sub>24</sub>H<sub>19</sub>F<sub>36</sub>N<sub>3</sub>O<sub>6</sub>P<sub>3</sub> which generate the [M+H]<sup>+</sup> ions of 622.028960, 922.009798 and 1221.990638. The corresponding MS<sup>2</sup> method operating in automatic precursor selection mode picks up the two most intense precursors per cycle, applies smart exclusion after five spectra and performs CID and MS/MS spectra acquisition time ramping. CID Energy was ramped from

35 eV for 500 m/z to 45 eV for 1000 m/z and 60 eV for 2000 m/z. MS full scan acquisition rate was set to 2Hz and MS/MS spectra acquisition rates were ramped from one to four Hz for precursor ion intensities of 10kcts to 1000kcts.

### **3.4 Statistical Data Treatment using Principal Component Analysis**

One issue encountered while trying to identify the secondary metabolites produced by the *pcy* biosynthetic gene cluster was that homologous recombination apparently also affected the host strain in ways not necessarily linked to the locus of homologous recombination. While the metabolome detectable with LC-MS changed only minimally upon targeted gene cluster disruption, introduction of the promoter upstream to the *pcyA* gene lead to diverse changes in the metabolome (main text Figure 4). It was therefore crucial to apply a statistical filter using PCA in order to pinpoint peaks truly unique to the 'activation' mutant and to discriminate those displaying only a fold change in abundance. To search for statistically relevant differences between the two pyxidicycline cluster inactivation mutants and the wild type as well as between the promoter exchange mutants and the inactivation mutants, 6 LC-HRMS measurements from extracts of three independent cultivations per bacterial strain are used for statistical data treatment. For preprocessing of MS data the molecular feature finder implemented in Bruker Compass Data Analysis 4.2 (Bruker, Bremen) was used with the compound detection parameters SN threshold 1; Correlation coefficient 0.9; minimum compound length 10 spectra and smoothing width of 3 spectra. Bucketing was done with Bruker Compass Profile Analysis 2.1 (Bruker, Bremen) with advanced bucketing and window parameters of 30s and 15 ppm. Bucket value was log transformed to avoid under-evaluating low intensity signals in the presence of high intensity signals<sup>11</sup>. The PCA t-Test function was used in order to separate medium derived MS features from the metabolome derived MS features, since the t-Test table that can be exported from Bruker Compass Profile Analysis 2.1 (Bruker, Bremen) contains information upon how many blanks and how many bacterial extracts contain said feature.

### **3.5 Purification protocols of all pyxidicycline related compounds**

#### **3.5.1 Isolation of the anthraquinone precursors 296, 324 and 340**

The *Pyxidicoccus fallax* mutant strain *Pyxidicoccus fallax* And48 *pcyA* :: pSBtn5 *pcyA* is fermented in 50 ml YM medium supplemented with Kanamycin 50 µg/ml as a seed culture flasks on an Orbiton shaker at 160 rpm and 30°C. After the culture reaches OD of 0.8 after 5 to 7 days of fermentation it is used to inoculate 6 x 2L YM Kanamycin 50 µg/ml medium supplemented with 2 % XAD-16 resin suspension in

sterilized water in 6 x 5L baffled shake flasks on an Orbiton shaker at 160 rpm and 30°C. Fermentation is complete after 14 days. Cells and XAD-16 resin are harvested by centrifugation on a Beckmann Avanti J-26 XP with the JLA 8.1 rotor at 6000 rcf. Combined resin and cells are extracted with 2 x 500 ml of technical grade methanol (Fluka) and 2 x 500 ml of technical grade acetone (Fluka). The extracts are combined and all solvent is evaporated on a rotary evaporator. Residue is taken up in 10 ml of analytical grade methanol (Fluka) for chromatographical separation. Purification was carried out on a Waters Autopurifier (Eschborn, Germany) high pressure gradient system, equipped with 2545 binary gradient module, SFO system fluidics organizer, 2767 sample manager and a 2998 photodiode array detector coupled to a 3100 single quadrupole mass spectrometer operated in positive ion mode. Source and voltage settings for the MS were as follows: mass range, m/z 300 - 1000; scan duration, 1 s; points per Dalton, 4; capillary voltage, 3.5 kV; cone voltage, 30 V; extractor voltage 3 V; RF lens, 0.1 V; source temperature 120 C, desolvation temperature, 250 C; desolvation gas flow, 400 L/hr; cone gas flow, 50 L/hr; ion counting threshold, 30. Autopurification is done by setting the fraction collection trigger masses 297.1, 325.1 and 340.1 which correspond to the  $[M+H]^+$  ions of the anthraquinones. Separation was carried out on Phenomenex Kinetex Biphenyl 5  $\mu$ m, 250 x 20 mm column using MeOH + 0.1 % FA as B and H<sub>2</sub>O + 0.1% FA as A with a flow rate of 25 ml/min. Separation is started with a plateau at 95% A for 2 minutes followed by a ramp to 32% A during 4 minutes and a ramp to 2% A during 30 minutes. The A content is kept at 5% A for 2 minutes. The A content is ramped back to starting conditions during 30 seconds and the column is re equilibrated for 5 minutes. Further purification is done using a Dionex Ultimate 3000 SDLC low pressure gradient system on a Phenomenex Luna C-18, 5 $\mu$ m 250x10mm column with the eluents H<sub>2</sub>O + 0.1 % FA as A and MeOH + 0.1 % FA as B, a flow rate of 5 ml/min and a column thermostated at 30°C. The Anthraquinones are detected by UV absorption at 256 nm and 432 nm. The gradient that starts with a plateau at 95 % A for 2 minutes followed by a ramp to 59 % A during 6 minutes. Then A content is ramped to 30 % during 17 minutes and finally ramped to 5 % A during 1 minute. A content is kept at 5 % for 1 minute and then ramped back to 95 % during 30 seconds. The column is reequilibrated at 95 % A for 5 minutes. The pure compounds are subsequently dried by lyophilization. All three anthraquinones are obtained as dark yellow substances that possess slightly varying fluorescent yellow colors in solution depending on the solvent. Upon deprotonation, the color of all three compounds changes to dark red. The compounds are analyzed by LCUV and LC-HRMS before NMR spectra are acquired.

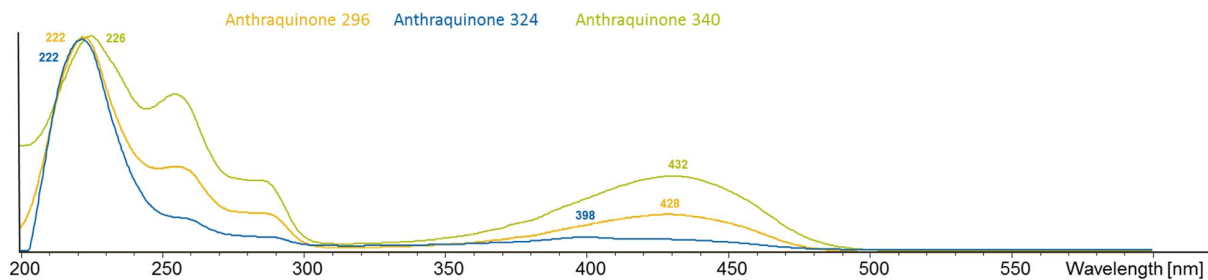

Figure S 13: UV absorption spectra of the anthraquinone metabolites acquired with the Dionex Ultimate 3000 diode array detector during an LC run using  $H_2O + 0.1\% FA$  and  $ACN + 0.1\% FA$  as eluents.

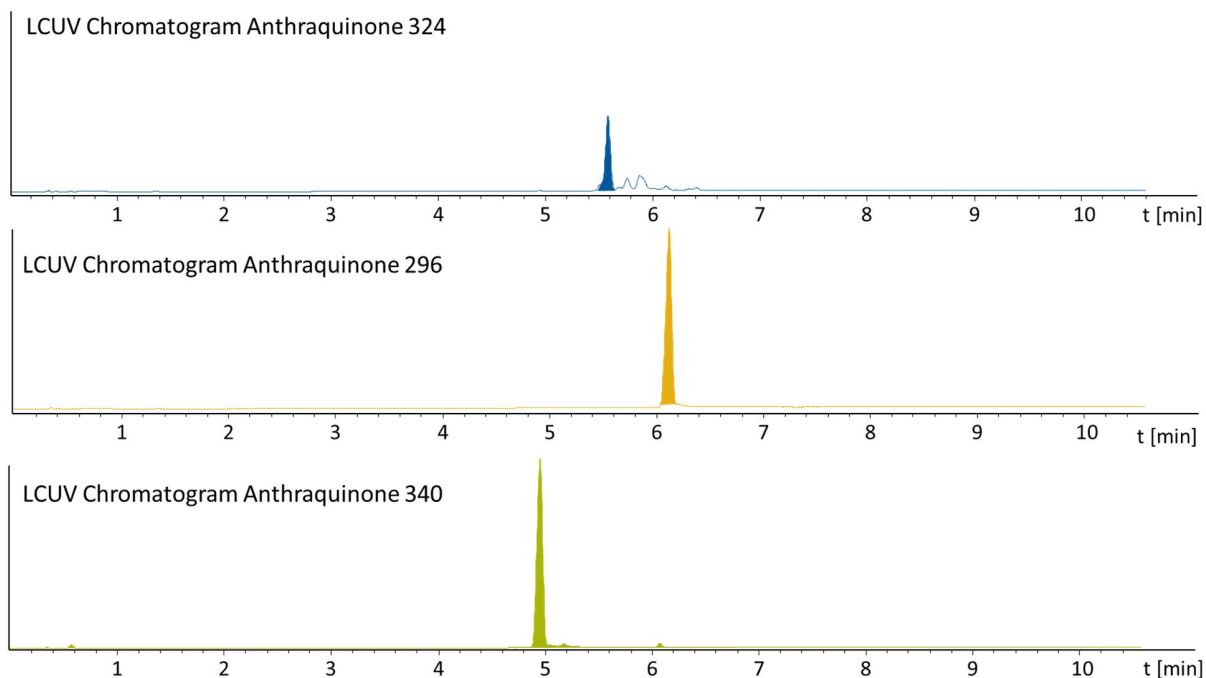

Figure S 14: LC-UV Chromatograms of the three isolated Anthraquinone metabolites for purity analysis by liquid chromatography

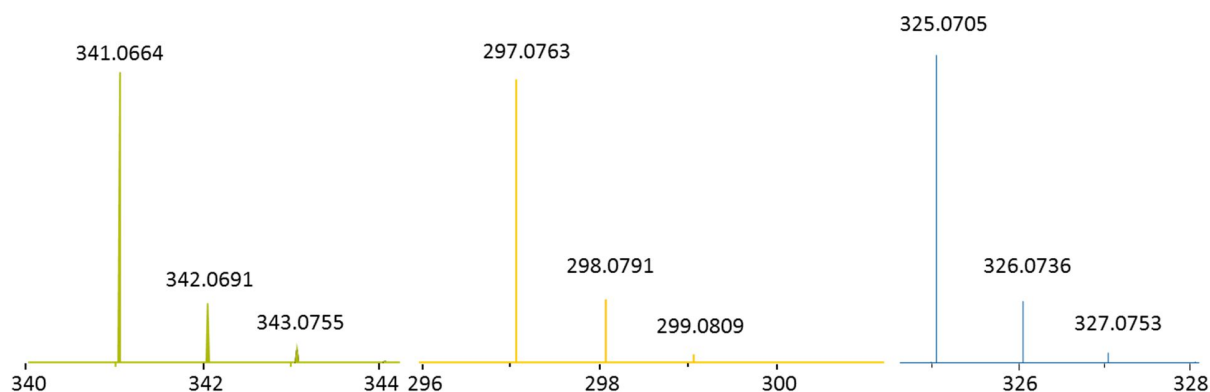

Figure S 15: High resolution masses of anthraquinone 340,296 and 325  $[M+H]^+$  in m/z units acquired on our maXis4G qTOF high resolution mass spectrometer

### 3.5.2 Isolation of Pyxidicycline A and B

The *Pyxidicoccus fallax* mutant strain *Pyxidicoccus fallax* And48 *pcyA* :: pFPVan *pcyA*, *pcyJ* :: pFPtettn5 *pcyJ* (An d48 *pcy*) is fermented in 50 ml YM medium supplemented with Kanamycin 50  $\mu\text{g}/\text{ml}$  as a seed culture flasks on an Orbiton shaker at 160 rpm and 30°C. After the culture reaches OD of 0.8 after 5 to 7 days of fermentation it is used to inoculate 6 x 2L YM Kanamycin 50  $\mu\text{g}/\text{ml}$  medium supplemented with 2 % XAD-16 resin suspension in sterilized water in 6 x 5L baffled shake flasks on an Orbiton shaker at 160 rpm and 30°C. Simultaneously with inoculation the cultures are supplemented with 5mM Sodium vanillate solution to induce pyxidicycline production. Fermentation is complete after 17 days. Cells and XAD-16 resin are harvested by centrifugation on a Beckmann Avanti J-26 XP with the JLA 8.1 rotor at 6000 rcf. Combined resin and cells are extracted with 2 x 500 ml of technical grade methanol (Fluka) and 2 x 500 ml of technical grade acetone (Fluka). The extracts are combined and all solvent is evaporated on a rotary evaporator. The residue is now partitioned between saturated brine and chloroform (2 extractions of 500 ml brine with 400 ml of chloroform) in a 2L separating funnel leading to close to complete transfer of the pyxidicyclines A and B into the chloroform phase. The chloroform phase is subsequently dried on a rotary evaporator. The residue is resuspended in 50 ml of analytical grade Acetonitrile and transferred completely into a 50 ml falcon tube (Sarstedt). After vigorous vortexing of the suspension the falcon tube is centrifuged for 15 min at 7800 rcf to pellet the pyxidicyclines that are close to insoluble in acetonitrile. The dark red residue is taken up in 1 ml of analytical grade formic acid (99 %, Sigma Aldrich) for chromatographic separation of pyxidicycline A and B. Purification is done using a Dionex Ultimate 3000 SDLC low pressure gradient system on an Agilent Zorbax XDB-C8, 5 $\mu\text{m}$  250x10mm column with the eluents H<sub>2</sub>O + 0.5% FA as A and MeOH + 0.5% FA as B, a flow rate of 5 ml/min and a column thermostated at 30°C.

The pyxidicyclines are detected by UV absorption at 474 nm (pyxidicycline B) and 498 nm (pyxidicycline A). The pyxidicyclines are further purified with the gradient that starts with a plateau at 95% A for 2 minutes followed by a ramp to 74% A during 3 minutes. Then A content is ramped to 56% during 32 minutes and finally ramped to 5% A during 30 seconds. A content is kept stable at 5% for 1 minute and then ramped back to 95% A during 30 seconds. The column is reequilibrated at 95% A for 5 minutes. The pure compounds are subsequently dried by lyophilization and obtained as the corresponding formate esters. The pyxidicyclines are obtained as dark red substances that possess slightly varying fluorescent orange colors in solution depending on the solvent. Upon deprotonation, the color of both pyxidicycline compounds changes to dark blue. In total 5 mg of pyxidicycline A and 4 mg of pyxidicycline B are obtained from the fermentation culture as formate esters. It is worth noting that the actual theoretical yield of pyxidicyclines seems to be at least 50 % higher as on the one hand elution of the pyxidicyclines from the XAD-16 resin is incomplete and on the other hand peak shape issues with the compounds in reverse phase chromatography due to low insolubility in all tested LC solvents lead to low recovery rates after chromatographic separation. Both compounds are very soluble and stable in formic acid while being insoluble in most common organic solvents and instable in DMSO and DMF.

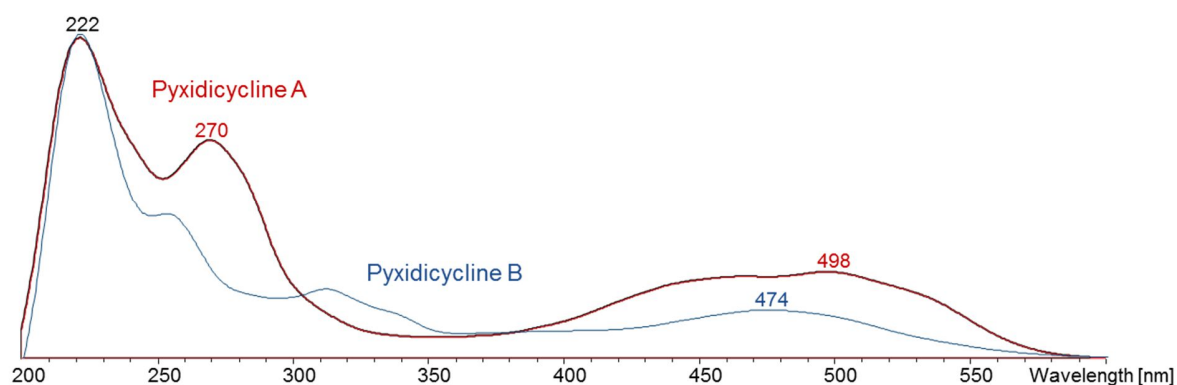

Figure S 16: UV absorption spectra of pyxidicycline A and B acquired with the Dionex Ultimate 3000 diode array detector during an LC run using  $H_2O + 0.1\% FA$  and  $ACN + 0.1\% FA$  as eluents.

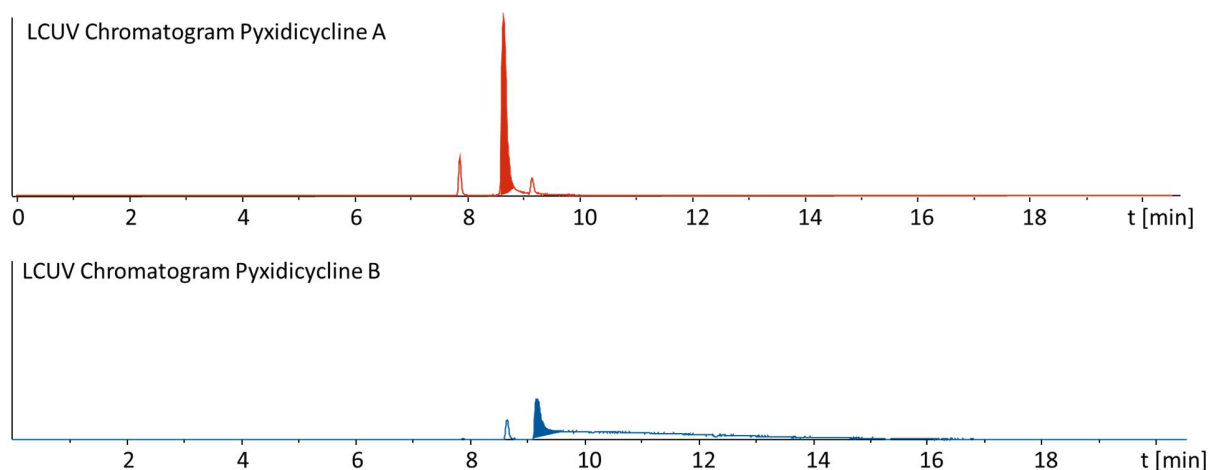

Figure S 17: LCUV Chromatograms of the two Pyxidicyclines for purity analysis by liquid chromatography, the first peak belonging to the formate ester, the second to the free pyxidicyclines

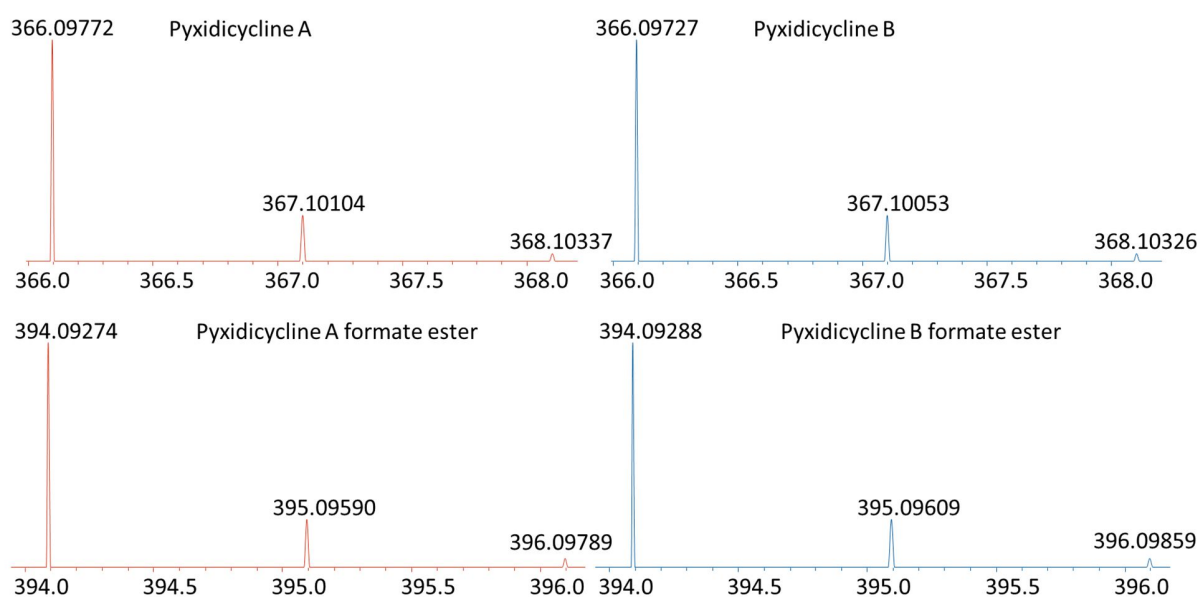

Figure S 18: High resolution masses of pyxidicycline A and B  $[M+H]^+$  in  $m/z$  units as well as the corresponding formate esters acquired on our *maXis4G* qTOF high resolution mass spectrometer

### 3.6 Crystallization parameters for the pyxidicycline A and B

The pure pyxidicyclines A and B are taken up in a minimum of formic acid to an approximate mass concentration of 5 mg/ml and filled into a 2 ml glass vial. The solutions are sonicated for a few minutes in an ultrasound bath until no visible residues remain. The solutions are subsequently placed into the



refrigerator with an unscrewed cap. After two days one can observe crystallization of pyxidicycline B as dark red needle shaped crystals. After one week one starts to observe crystallization of pyxidicycline A as dark red needle shaped crystals.

### 3.7 Crystal structure parameters obtained through single-crystal X-ray diffraction experiments

The compounds crystallized from formic acid solution as formic acid esters that formed needle shaped dark red crystals. The data were collected at low temperature on a BrukerAXS X8Apex CCD diffractometer operating with graphite-monochromatized Mo K $\alpha$  radiation. Frames of 0.5° oscillation were exposed; deriving reflections in the  $\theta$  range of 2 to 27° with a completeness of ~99%. Structure solving and full least-squares refinement with anisotropic thermal parameters of all non-hydrogen atoms were performed using SHELX<sup>12</sup>. Crystal structure parameters for pyxidicycline B: orthorhombic, Pca2<sub>1</sub>, a=7.0231(8) b=17.534(2) c=14.682(2)Å ; and for pyxidicycline A: triclinic, P-1, a=7.090(1) b=7.910(2) 17.330(3)Å,  $\alpha$ =89.56(1)  $\beta$ =84.80(1),  $\gamma$ =74.66(1). All relevant data concerning the crystal structures can be found in this section. Crystallographic data for the structure have been deposited with the Cambridge Crystallographic Data Centre, CCDC, 12 Union Road, Cambridge CB21EZ, UK. Copies of the data can be obtained free of charge on quoting the repository number **CCDC 1831467** and **1831468**. [www.ccdc.cam.ac.uk/data\\_request/cif](http://www.ccdc.cam.ac.uk/data_request/cif)

#### 3.7.1 Crystallographic data pyxidicycline A

Table S 7: Crystal data and structure refinement for pyxidicycline A formate ester (sh3817)

|                             |                                                                                     |
|-----------------------------|-------------------------------------------------------------------------------------|
| <b>Identification code</b>  | <b>sh3817</b>                                                                       |
| <b>Empirical formula</b>    | C <sub>21</sub> H <sub>15</sub> N O <sub>7</sub> , C H <sub>2</sub> O <sub>2</sub>  |
| <b>Formula weight</b>       | 439.36                                                                              |
| <b>Temperature</b>          | 172(2) K                                                                            |
| <b>Wavelength</b>           | 0.71073 Å                                                                           |
| <b>Crystal system</b>       | Triclinic                                                                           |
| <b>Space group</b>          | P-1                                                                                 |
| <b>Unit cell dimensions</b> | a = 7.0902(12) Å $\alpha$ = 89.561(13)°.<br>b = 7.9097(15) Å $\beta$ = 84.797(11)°. |

|                                                          |                                                                    |
|----------------------------------------------------------|--------------------------------------------------------------------|
|                                                          | $c = 17.330(3) \text{ \AA}$ $\gamma = 74.655(12)^\circ$ .          |
| <b>Volume</b>                                            | 933.2(3) $\text{\AA}^3$                                            |
| <b>Z</b>                                                 | 2                                                                  |
| <b>Density (calculated)</b>                              | 1.564 $\text{Mg/m}^3$                                              |
| <b>Absorption coefficient</b>                            | 0.123 $\text{mm}^{-1}$                                             |
| <b>F(000)</b>                                            | 456                                                                |
| <b>Crystal size</b>                                      | 0.311 x 0.048 x 0.030 $\text{mm}^3$                                |
| <b>Theta range for data collection</b>                   | 1.180 to 26.505 $^\circ$ .                                         |
| <b>Index ranges</b>                                      | -8 $\leq$ h $\leq$ 8, -8 $\leq$ k $\leq$ 8, -21 $\leq$ l $\leq$ 21 |
| <b>Reflections collected</b>                             | 19696                                                              |
| <b>Independent reflections</b>                           | 3546 [R(int) = 0.1065]                                             |
| <b>Completeness to theta = 25.242<math>^\circ</math></b> | 93.1 %                                                             |
| <b>Absorption correction</b>                             | Semi-empirical from equivalents                                    |
| <b>Max. and min. transmission</b>                        | 0.7454 and 0.6615                                                  |
| <b>Refinement method</b>                                 | Full-matrix least-squares on F <sup>2</sup>                        |
| <b>Data / restraints / parameters</b>                    | 3546 / 3 / 270                                                     |
| <b>Goodness-of-fit on F<sup>2</sup></b>                  | 1.614                                                              |
| <b>Final R indices [I&gt;2<math>\sigma</math>(I)]</b>    | R1 = 0.1357, wR2 = 0.3337                                          |
| <b>R indices (all data)</b>                              | R1 = 0.2936, wR2 = 0.3784                                          |
| <b>Extinction coefficient</b>                            | n/a                                                                |
| <b>Largest diff. peak and hole</b>                       | 0.840 and -0.594 $\text{e.\AA}^{-3}$                               |

Table S 8: Atomic coordinates ( $\times 10^4$ ) and equivalent isotropic displacement parameters ( $\text{\AA}^2 \times 10^3$ ) for pyxidicycline A formate ester (sh3817).  $U(\text{eq})$  is defined as one third of the trace of the orthogonalized  $U^{ij}$  tensor

|             | <b>x</b> | <b>y</b> | <b>z</b> | <b>U(eq)</b> |
|-------------|----------|----------|----------|--------------|
| <b>O(1)</b> | 1924(9)  | 1200(8)  | 1896(3)  | 66(2)        |
| <b>O(2)</b> | 4364(8)  | 1588(7)  | 5903(3)  | 54(2)        |
| <b>O(3)</b> | 2204(8)  | 9208(7)  | 6772(3)  | 52(2)        |
| <b>O(4)</b> | 1603(7)  | 8506(7)  | 5380(3)  | 37(1)        |
| <b>O(5)</b> | 952(7)   | 7853(7)  | 4050(3)  | 42(2)        |
| <b>N(1)</b> | 1302(8)  | 4089(9)  | 2279(4)  | 41(2)        |
| <b>C(1)</b> | 1909(12) | 2248(14) | 2430(6)  | 55(3)        |
| <b>C(2)</b> | 2472(11) | 1804(11) | 3168(5)  | 44(2)        |

|              |          |           |           |         |
|--------------|----------|-----------|-----------|---------|
| <b>C(3)</b>  | 2407(10) | 3094(10)  | 3738(5)   | 35(2)   |
| <b>C(4)</b>  | 3025(10) | 2570(12)  | 4475(5)   | 43(2)   |
| <b>C(5)</b>  | 2990(9)  | 3783(11)  | 5036(4)   | 32(2)   |
| <b>C(6)</b>  | 3651(10) | 3167(11)  | 5781(4)   | 37(2)   |
| <b>C(7)</b>  | 3500(10) | 4478(11)  | 6402(4)   | 36(2)   |
| <b>C(8)</b>  | 4022(11) | 3886(12)  | 7124(5)   | 44(2)   |
| <b>C(9)</b>  | 3968(11) | 5079(13)  | 7701(5)   | 49(3)   |
| <b>C(10)</b> | 3345(10) | 6815(12)  | 7571(4)   | 47(2)   |
| <b>C(11)</b> | 2798(10) | 7457(11)  | 6853(4)   | 37(2)   |
| <b>C(12)</b> | 2849(9)  | 6283(10)  | 6253(4)   | 26(2)   |
| <b>C(13)</b> | 2217(10) | 6858(11)  | 5500(4)   | 36(2)   |
| <b>C(14)</b> | 2291(9)  | 5609(10)  | 4887(4)   | 30(2)   |
| <b>C(15)</b> | 1678(10) | 6143(10)  | 4157(4)   | 31(2)   |
| <b>C(16)</b> | 1755(10) | 4910(10)  | 3545(4)   | 32(2)   |
| <b>C(17)</b> | 1252(10) | 5381(10)  | 2808(4)   | 33(2)   |
| <b>C(18)</b> | 738(11)  | 7251(10)  | 2521(4)   | 48(2)   |
| <b>C(19)</b> | 615(12)  | 4465(13)  | 1507(5)   | 69(3)   |
| <b>C(20)</b> | 2269(18) | 4228(18)  | 853(7)    | 114(4)  |
| <b>O(6)</b>  | 3079(12) | 5635(13)  | 806(5)    | 125(3)  |
| <b>C(21)</b> | 2760(40) | 6910(40)  | 179(15)   | 271(12) |
| <b>O(7A)</b> | 2560(30) | 5770(30)  | -324(12)  | 220(9)  |
| <b>O(7B)</b> | 1250(50) | 7480(60)  | -230(20)  | 226(11) |
| <b>O(8A)</b> | 5360(20) | 11320(20) | -1343(9)  | 104(5)  |
| <b>C(22)</b> | 3920(40) | 11070(30) | -1139(11) | 148(6)  |
| <b>O(9A)</b> | 2430(50) | 11450(40) | -1026(16) | 210(9)  |
| <b>O(9B)</b> | 3890(40) | 10020(40) | -719(16)  | 205(9)  |
| <b>O(8B)</b> | 100(20)  | 9990(20)  | -868(9)   | 127(6)  |

Table S 9: Bond lengths [Å] and angles [°] for pyxidicycline A formate ester (sh3817)

| <b>Bond lengths [Å]</b> |           |
|-------------------------|-----------|
| <b>O(1)-C(1)</b>        | 1.245(10) |
| <b>O(2)-C(6)</b>        | 1.242(8)  |
| <b>O(3)-C(11)</b>       | 1.347(9)  |
| <b>O(3)-H(3)</b>        | 0.8400    |

|              |           |
|--------------|-----------|
| O(4)-C(13)   | 1.282(8)  |
| O(5)-C(15)   | 1.332(8)  |
| O(5)-H(5)    | 0.8400    |
| N(1)-C(17)   | 1.369(9)  |
| N(1)-C(1)    | 1.434(11) |
| N(1)-C(19)   | 1.467(9)  |
| C(1)-C(2)    | 1.389(11) |
| C(2)-C(3)    | 1.415(11) |
| C(2)-H(2)    | 0.9500    |
| C(3)-C(4)    | 1.412(10) |
| C(3)-C(16)   | 1.434(10) |
| C(4)-C(5)    | 1.365(11) |
| C(4)-H(4)    | 0.9500    |
| C(5)-C(14)   | 1.427(10) |
| C(5)-C(6)    | 1.450(10) |
| C(6)-C(7)    | 1.478(11) |
| C(7)-C(8)    | 1.380(9)  |
| C(7)-C(12)   | 1.409(10) |
| C(8)-C(9)    | 1.371(11) |
| C(8)-H(8)    | 0.9500    |
| C(9)-C(10)   | 1.350(11) |
| C(9)-H(9)    | 0.9500    |
| C(10)-C(11)  | 1.388(9)  |
| C(10)-H(10)  | 0.9500    |
| C(11)-C(12)  | 1.391(10) |
| C(12)-C(13)  | 1.449(10) |
| C(13)-C(14)  | 1.445(10) |
| C(14)-C(15)  | 1.400(9)  |
| C(15)-C(16)  | 1.434(10) |
| C(16)-C(17)  | 1.379(9)  |
| C(17)-C(18)  | 1.518(10) |
| C(18)-H(18A) | 0.9800    |
| C(18)-H(18B) | 0.9800    |
| C(18)-H(18C) | 0.9800    |
| C(19)-C(20)  | 1.530(13) |

|              |           |
|--------------|-----------|
| C(19)-H(19A) | 0.9900    |
| C(19)-H(19B) | 0.9900    |
| C(20)-O(6)   | 1.380(13) |
| C(20)-H(20A) | 0.9900    |
| C(20)-H(20B) | 0.9900    |
| O(6)-C(21)   | 1.47(3)   |
| C(21)-O(7A)  | 1.30(2)   |
| C(21)-O(7B)  | 1.31(2)   |
| C(21)-H(21A) | 0.9500    |
| C(21)-H(21B) | 0.9500    |
| O(8A)-C(22)  | 1.12(2)   |
| C(22)-O(9A)  | 1.02(3)   |
| C(22)-O(9B)  | 1.10(3)   |
| O(9A)-O(9B)  | 1.45(3)   |

**Bond angles [°]**

|                  |          |
|------------------|----------|
| C(11)-O(3)-H(3)  | 109.5    |
| C(15)-O(5)-H(5)  | 109.5    |
| C(17)-N(1)-C(1)  | 124.3(7) |
| C(17)-N(1)-C(19) | 122.7(7) |
| C(1)-N(1)-C(19)  | 112.9(8) |
| O(1)-C(1)-C(2)   | 125.9(9) |
| O(1)-C(1)-N(1)   | 118.2(8) |
| C(2)-C(1)-N(1)   | 115.8(9) |
| C(1)-C(2)-C(3)   | 121.8(8) |
| C(1)-C(2)-H(2)   | 119.1    |
| C(3)-C(2)-H(2)   | 119.1    |
| C(4)-C(3)-C(2)   | 119.5(7) |
| C(4)-C(3)-C(16)  | 121.5(8) |
| C(2)-C(3)-C(16)  | 119.0(7) |
| C(5)-C(4)-C(3)   | 120.9(8) |
| C(5)-C(4)-H(4)   | 119.5    |
| C(3)-C(4)-H(4)   | 119.5    |
| C(4)-C(5)-C(14)  | 120.1(7) |
| C(4)-C(5)-C(6)   | 118.4(8) |
| C(14)-C(5)-C(6)  | 121.5(8) |

|                          |          |
|--------------------------|----------|
| <b>O(2)-C(6)-C(5)</b>    | 122.0(8) |
| <b>O(2)-C(6)-C(7)</b>    | 119.7(7) |
| <b>C(5)-C(6)-C(7)</b>    | 118.3(7) |
| <b>C(8)-C(7)-C(12)</b>   | 121.4(8) |
| <b>C(8)-C(7)-C(6)</b>    | 118.3(8) |
| <b>C(12)-C(7)-C(6)</b>   | 120.3(7) |
| <b>C(9)-C(8)-C(7)</b>    | 119.3(8) |
| <b>C(9)-C(8)-H(8)</b>    | 120.3    |
| <b>C(7)-C(8)-H(8)</b>    | 120.3    |
| <b>C(10)-C(9)-C(8)</b>   | 120.3(8) |
| <b>C(10)-C(9)-H(9)</b>   | 119.9    |
| <b>C(8)-C(9)-H(9)</b>    | 119.9    |
| <b>C(9)-C(10)-C(11)</b>  | 122.0(8) |
| <b>C(9)-C(10)-H(10)</b>  | 119.0    |
| <b>C(11)-C(10)-H(10)</b> | 119.0    |
| <b>O(3)-C(11)-C(10)</b>  | 118.2(8) |
| <b>O(3)-C(11)-C(12)</b>  | 122.6(7) |
| <b>C(10)-C(11)-C(12)</b> | 119.3(8) |
| <b>C(11)-C(12)-C(7)</b>  | 117.8(7) |
| <b>C(11)-C(12)-C(13)</b> | 122.3(7) |
| <b>C(7)-C(12)-C(13)</b>  | 119.9(7) |
| <b>O(4)-C(13)-C(14)</b>  | 119.9(7) |
| <b>O(4)-C(13)-C(12)</b>  | 119.0(7) |
| <b>C(14)-C(13)-C(12)</b> | 121.1(7) |
| <b>C(15)-C(14)-C(5)</b>  | 119.4(7) |
| <b>C(15)-C(14)-C(13)</b> | 121.8(7) |
| <b>C(5)-C(14)-C(13)</b>  | 118.8(7) |
| <b>O(5)-C(15)-C(14)</b>  | 117.7(7) |
| <b>O(5)-C(15)-C(16)</b>  | 120.2(7) |
| <b>C(14)-C(15)-C(16)</b> | 122.1(7) |
| <b>C(17)-C(16)-C(15)</b> | 123.9(7) |
| <b>C(17)-C(16)-C(3)</b>  | 120.2(7) |
| <b>C(15)-C(16)-C(3)</b>  | 115.9(7) |
| <b>N(1)-C(17)-C(16)</b>  | 118.8(7) |
| <b>N(1)-C(17)-C(18)</b>  | 116.7(6) |

|                         |           |
|-------------------------|-----------|
| C(16)-C(17)-C(18)       | 124.4(7)  |
| C(17)-C(18)-H(18A)      | 109.5     |
| C(17)-C(18)-H(18B)      | 109.5     |
| H(18A)-C(18)-<br>H(18B) | 109.5     |
| C(17)-C(18)-H(18C)      | 109.5     |
| H(18A)-C(18)-H(18C)     | 109.5     |
| H(18B)-C(18)-<br>H(18C) | 109.5     |
| N(1)-C(19)-C(20)        | 114.0(7)  |
| N(1)-C(19)-H(19A)       | 108.7     |
| C(20)-C(19)-H(19A)      | 108.7     |
| N(1)-C(19)-H(19B)       | 108.7     |
| C(20)-C(19)-H(19B)      | 108.7     |
| H(19A)-C(19)-<br>H(19B) | 107.6     |
| O(6)-C(20)-C(19)        | 112.2(11) |
| O(6)-C(20)-H(20A)       | 109.2     |
| C(19)-C(20)-H(20A)      | 109.2     |
| O(6)-C(20)-H(20B)       | 109.2     |
| C(19)-C(20)-H(20B)      | 109.2     |
| H(20A)-C(20)-<br>H(20B) | 107.9     |
| C(20)-O(6)-C(21)        | 123.1(15) |
| O(7A)-C(21)-O(6)        | 93(2)     |
| O(7B)-C(21)-O(6)        | 131(3)    |
| O(7A)-C(21)-H(21A)      | 133.3     |
| O(6)-C(21)-H(21A)       | 133.3     |
| O(7B)-C(21)-H(21B)      | 114.7     |
| O(6)-C(21)-H(21B)       | 114.7     |
| O(9A)-C(22)-O(9B)       | 86(3)     |
| O(9A)-C(22)-O(8A)       | 152(3)    |
| O(9B)-C(22)-O(8A)       | 119(3)    |
| C(22)-O(9A)-O(9B)       | 49.1(19)  |
| C(22)-O(9B)-O(9A)       | 44.6(18)  |

Table S 10: Anisotropic displacement parameters ( $\text{\AA}^2 \times 10^3$ ) for pyxidicycline A formate ester (sh3817). The anisotropic displacement factor exponent takes the form:  $-2\pi^2[h^2 a^{*2}U^{11} + \dots + 2 h k a^* b^* U^{12}]$

|              | $U^{11}$ | $U^{22}$ | $U^{33}$ | $U^{23}$ | $U^{13}$ | $U^{12}$ |
|--------------|----------|----------|----------|----------|----------|----------|
| <b>O(1)</b>  | 91(5)    | 46(5)    | 58(4)    | -12(3)   | -20(3)   | -10(3)   |
| <b>O(2)</b>  | 77(4)    | 20(4)    | 57(4)    | 1(3)     | -17(3)   | 2(3)     |
| <b>O(3)</b>  | 70(4)    | 30(4)    | 49(4)    | -3(3)    | -19(3)   | 2(3)     |
| <b>O(4)</b>  | 44(3)    | 20(4)    | 42(3)    | 4(2)     | -1(2)    | 0(2)     |
| <b>O(5)</b>  | 50(4)    | 27(4)    | 45(4)    | 12(3)    | -7(3)    | -3(3)    |
| <b>N(1)</b>  | 37(4)    | 42(6)    | 36(4)    | 4(4)     | -2(3)    | 2(3)     |
| <b>C(1)</b>  | 44(6)    | 57(8)    | 59(7)    | -1(6)    | -2(5)    | -5(5)    |
| <b>C(2)</b>  | 46(5)    | 32(6)    | 53(6)    | 5(4)     | -6(4)    | -8(4)    |
| <b>C(3)</b>  | 39(5)    | 16(6)    | 47(5)    | 7(4)     | 0(4)     | -6(4)    |
| <b>C(4)</b>  | 33(5)    | 43(7)    | 50(6)    | 16(5)    | -6(4)    | -7(4)    |
| <b>C(5)</b>  | 18(4)    | 37(6)    | 36(5)    | 3(4)     | -4(3)    | 2(4)     |
| <b>C(6)</b>  | 34(5)    | 22(6)    | 48(6)    | 12(4)    | -1(4)    | 2(4)     |
| <b>C(7)</b>  | 33(5)    | 41(7)    | 32(5)    | 0(4)     | 0(4)     | -7(4)    |
| <b>C(8)</b>  | 45(5)    | 39(7)    | 47(6)    | 7(5)     | 1(4)     | -9(4)    |
| <b>C(9)</b>  | 48(5)    | 48(7)    | 48(6)    | 16(5)    | -11(4)   | -4(5)    |
| <b>C(10)</b> | 43(5)    | 65(8)    | 32(5)    | -14(4)   | -11(4)   | -11(5)   |
| <b>C(11)</b> | 38(5)    | 36(7)    | 35(5)    | 0(4)     | 3(4)     | -10(4)   |
| <b>C(12)</b> | 22(4)    | 15(5)    | 35(5)    | 4(4)     | 0(3)     | 4(3)     |
| <b>C(13)</b> | 24(4)    | 25(6)    | 57(6)    | 3(4)     | -3(4)    | -1(4)    |
| <b>C(14)</b> | 27(4)    | 23(6)    | 42(5)    | 2(4)     | -8(4)    | -6(3)    |
| <b>C(15)</b> | 28(4)    | 21(6)    | 41(5)    | 8(4)     | 2(4)     | -2(4)    |
| <b>C(16)</b> | 33(4)    | 25(6)    | 37(5)    | -9(4)    | 2(4)     | -6(4)    |
| <b>C(17)</b> | 35(5)    | 30(6)    | 34(5)    | -3(4)    | -7(4)    | -7(4)    |
| <b>C(18)</b> | 63(6)    | 37(6)    | 41(5)    | 7(4)     | -6(4)    | -8(4)    |
| <b>C(19)</b> | 45(6)    | 92(9)    | 63(7)    | -21(5)   | 1(5)     | -7(5)    |



Table S 11: Hydrogen coordinates ( $\times 10^4$ ) and isotropic displacement parameters ( $\text{\AA}^2 \times 10^3$ ) for pyxidicycline A formate ester (sh3817).

|               | <b>x</b> | <b>y</b> | <b>z</b> | <b>U(eq)</b> |
|---------------|----------|----------|----------|--------------|
| <b>H(3)</b>   | 1821     | 9436     | 6329     | 77           |
| <b>H(5)</b>   | 1532     | 8156     | 3650     | 63           |
| <b>H(2)</b>   | 2913     | 600      | 3293     | 53           |
| <b>H(4)</b>   | 3471     | 1357     | 4582     | 51           |
| <b>H(8)</b>   | 4414     | 2665     | 7220     | 53           |
| <b>H(9)</b>   | 4370     | 4683     | 8194     | 59           |
| <b>H(10)</b>  | 3279     | 7620     | 7982     | 56           |
| <b>H(18A)</b> | 747      | 8057     | 2946     | 72           |
| <b>H(18B)</b> | 1706     | 7367     | 2097     | 72           |
| <b>H(18C)</b> | -571     | 7536     | 2334     | 72           |
| <b>H(19A)</b> | -214     | 5687     | 1505     | 83           |
| <b>H(19B)</b> | -218     | 3682     | 1402     | 83           |
| <b>H(20A)</b> | 3308     | 3148     | 941      | 136          |
| <b>H(20B)</b> | 1747     | 4080     | 354      | 136          |
| <b>H(21A)</b> | 2717     | 8123     | 151      | 325          |
| <b>H(21B)</b> | 3826     | 7411     | 46       | 325          |

### 3.7.2 Crystallographic data pyxidicycline B

Table S 12: Crystal data and structure refinement for pyxidicycline B formate ester (sh3811)

|                             |                                                                                    |
|-----------------------------|------------------------------------------------------------------------------------|
| <b>Identification code</b>  | <b>sh3811</b>                                                                      |
| <b>Empirical formula</b>    | C <sub>21</sub> H <sub>15</sub> N O <sub>7</sub> , C H <sub>2</sub> O <sub>2</sub> |
| <b>Formula weight</b>       | 439.36                                                                             |
| <b>Temperature</b>          | 152(2) K                                                                           |
| <b>Wavelength</b>           | 0.71073 Å                                                                          |
| <b>Crystal system</b>       | Orthorhombic                                                                       |
| <b>Space group</b>          | Pca2 <sub>1</sub>                                                                  |
| <b>Unit cell dimensions</b> | a = 7.0231(8) Å $\alpha = 90^\circ$ .                                              |

|                                                         |                                                                  |
|---------------------------------------------------------|------------------------------------------------------------------|
|                                                         | $b = 17.534(2) \text{ \AA}$ $\beta = 90^\circ$ .                 |
|                                                         | $c = 14.6817(19) \text{ \AA}$ $\gamma = 90^\circ$ .              |
| <b>Volume</b>                                           | 1807.9(4) $\text{\AA}^3$                                         |
| <b>Z</b>                                                | 4                                                                |
| <b>Density (calculated)</b>                             | 1.614 $\text{Mg/m}^3$                                            |
| <b>Absorption coefficient</b>                           | 0.127 $\text{mm}^{-1}$                                           |
| <b>F(000)</b>                                           | 912                                                              |
| <b>Crystal size</b>                                     | 0.506 x 0.126 x 0.022 $\text{mm}^3$                              |
| <b>Theta range for data collection</b>                  | 1.161 to 27.705°.                                                |
| <b>Index ranges</b>                                     | $-8 \leq h \leq 9$ , $-22 \leq k \leq 22$ , $-17 \leq l \leq 19$ |
| <b>Reflections collected</b>                            | 15148                                                            |
| <b>Independent reflections</b>                          | 4084 [R(int) = 0.0370]                                           |
| <b>Completeness to theta = 25.242°</b>                  | 100.0 %                                                          |
| <b>Absorption correction</b>                            | Semi-empirical from equivalents                                  |
| <b>Max. and min. transmission</b>                       | 0.7456 and 0.7222                                                |
| <b>Refinement method</b>                                | Full-matrix least-squares on $F^2$                               |
| <b>Data / restraints / parameters</b>                   | 4084 / 1 / 346                                                   |
| <b>Goodness-of-fit on <math>F^2</math></b>              | 1.054                                                            |
| <b>Final R indices [<math>I &gt; 2\sigma(I)</math>]</b> | R1 = 0.0452, wR2 = 0.1135                                        |
| <b>R indices (all data)</b>                             | R1 = 0.0653, wR2 = 0.1236                                        |
| <b>Absolute structure parameter</b>                     | 1.8(5)                                                           |
| <b>Extinction coefficient</b>                           | n/a                                                              |
| <b>Largest diff. peak and hole</b>                      | 0.717 and -0.216 $\text{e.\AA}^{-3}$                             |

Table S 13: Atomic coordinates ( $\times 10^4$ ) and equivalent isotropic displacement parameters ( $\text{\AA}^2 \times 10^3$ ) for pyxidicycline B formate ester (sh3811).  $U(\text{eq})$  is defined as one third of the trace of the orthogonalized  $U^{ij}$  tensor

|             | <b>x</b> | <b>y</b> | <b>z</b> | <b>U(eq)</b> |
|-------------|----------|----------|----------|--------------|
| <b>N(1)</b> | 951(4)   | 1835(2)  | 5287(2)  | 20(1)        |
| <b>O(1)</b> | 1925(3)  | 1160(1)  | 4044(2)  | 31(1)        |
| <b>O(2)</b> | 1993(4)  | 3824(2)  | 2963(2)  | 34(1)        |
| <b>O(3)</b> | 117(3)   | 6865(1)  | 6376(2)  | 27(1)        |
| <b>O(4)</b> | -47(3)   | 5390(1)  | 6437(2)  | 25(1)        |

|              |         |         |         |       |
|--------------|---------|---------|---------|-------|
| <b>O(5)</b>  | -269(3) | 3993(1) | 6472(2) | 24(1) |
| <b>O(6)</b>  | 3284(3) | 1336(2) | 6796(2) | 37(1) |
| <b>O(7)</b>  | 6321(4) | 960(2)  | 6715(3) | 51(1) |
| <b>C(1)</b>  | 1570(5) | 1795(2) | 4375(3) | 23(1) |
| <b>C(2)</b>  | 1757(5) | 2492(2) | 3914(3) | 22(1) |
| <b>C(3)</b>  | 1381(4) | 3165(2) | 4327(2) | 18(1) |
| <b>C(4)</b>  | 1620(5) | 3868(2) | 3769(2) | 20(1) |
| <b>C(5)</b>  | 1381(4) | 4604(2) | 4232(2) | 19(1) |
| <b>C(6)</b>  | 1716(4) | 5262(2) | 3746(2) | 19(1) |
| <b>C(7)</b>  | 1474(4) | 5990(2) | 4170(3) | 19(1) |
| <b>C(8)</b>  | 1841(4) | 6655(2) | 3674(3) | 22(1) |
| <b>C(9)</b>  | 1629(5) | 7353(2) | 4092(3) | 24(1) |
| <b>C(10)</b> | 1063(5) | 7407(2) | 4996(3) | 24(1) |
| <b>C(11)</b> | 672(4)  | 6762(2) | 5503(3) | 21(1) |
| <b>C(12)</b> | 880(4)  | 6031(2) | 5097(3) | 18(1) |
| <b>C(13)</b> | 530(4)  | 5336(2) | 5580(3) | 18(1) |
| <b>C(14)</b> | 785(4)  | 4625(2) | 5158(2) | 17(1) |
| <b>C(15)</b> | 395(4)  | 3939(2) | 5677(2) | 18(1) |
| <b>C(16)</b> | 795(4)  | 3191(2) | 5256(2) | 18(1) |
| <b>C(17)</b> | 581(4)  | 2504(2) | 5729(2) | 18(1) |
| <b>C(18)</b> | -29(5)  | 2472(2) | 6700(3) | 23(1) |
| <b>C(19)</b> | 802(5)  | 1079(2) | 5735(3) | 26(1) |
| <b>C(20)</b> | 2705(5) | 813(2)  | 6083(3) | 29(1) |
| <b>C(21)</b> | 5108(5) | 1344(3) | 7039(3) | 37(1) |
| <b>O(8)</b>  | 6595(5) | 759(2)  | 4422(3) | 60(1) |
| <b>O(9)</b>  | 4950(5) | 692(2)  | 3115(2) | 45(1) |
| <b>C(22)</b> | 6458(6) | 580(2)  | 3644(4) | 42(1) |

Table S 14: Bond lengths [Å] and angles [°] for pyxidicycline B formate ester (sh3811)

| <b>Bond lengths [Å]</b> |          |
|-------------------------|----------|
| <b>N(1)-C(17)</b>       | 1.365(4) |
| <b>N(1)-C(1)</b>        | 1.410(5) |
| <b>N(1)-C(19)</b>       | 1.484(4) |
| <b>O(1)-C(1)</b>        | 1.239(4) |

|             |          |
|-------------|----------|
| O(2)-C(4)   | 1.215(5) |
| O(3)-C(11)  | 1.351(5) |
| O(3)-H(16)  | 0.96(6)  |
| O(4)-C(13)  | 1.326(4) |
| O(4)-H(17)  | 0.8400   |
| O(5)-C(15)  | 1.261(4) |
| O(6)-C(21)  | 1.330(5) |
| O(6)-C(20)  | 1.449(5) |
| O(7)-C(21)  | 1.185(5) |
| C(1)-C(2)   | 1.404(5) |
| C(2)-C(3)   | 1.353(5) |
| C(2)-H(1)   | 0.92(4)  |
| C(3)-C(16)  | 1.424(5) |
| C(3)-C(4)   | 1.490(5) |
| C(4)-C(5)   | 1.467(5) |
| C(5)-C(6)   | 1.378(5) |
| C(5)-C(14)  | 1.424(5) |
| C(6)-C(7)   | 1.429(5) |
| C(6)-H(2)   | 0.9500   |
| C(7)-C(8)   | 1.399(5) |
| C(7)-C(12)  | 1.425(5) |
| C(8)-C(9)   | 1.376(5) |
| C(8)-H(3)   | 0.9500   |
| C(9)-C(10)  | 1.390(6) |
| C(9)-H(4)   | 1.01(4)  |
| C(10)-C(11) | 1.381(5) |
| C(10)-H(5)  | 0.95(4)  |
| C(11)-C(12) | 1.421(5) |
| C(12)-C(13) | 1.431(4) |
| C(13)-C(14) | 1.404(4) |
| C(14)-C(15) | 1.449(5) |
| C(15)-C(16) | 1.477(5) |
| C(16)-C(17) | 1.399(5) |
| C(17)-C(18) | 1.489(5) |
| C(18)-H(7)  | 0.97(5)  |

|             |          |
|-------------|----------|
| C(18)-H(8)  | 0.98(5)  |
| C(18)-H(9)  | 0.85(4)  |
| C(19)-C(20) | 1.505(5) |
| C(19)-H(10) | 0.95(4)  |
| C(19)-H(11) | 0.94(5)  |
| C(20)-H(12) | 0.92(4)  |
| C(20)-H(13) | 0.94(4)  |
| C(21)-H(14) | 1.06(5)  |
| O(8)-C(22)  | 1.188(6) |
| O(9)-C(22)  | 1.328(6) |
| O(9)-H(15)  | 1.03(7)  |
| C(22)-H(18) | 1.07(5)  |

**Bond angles [°]**

|                  |          |
|------------------|----------|
| C(17)-N(1)-C(1)  | 123.7(3) |
| C(17)-N(1)-C(19) | 122.9(3) |
| C(1)-N(1)-C(19)  | 113.4(3) |
| C(11)-O(3)-H(16) | 105(3)   |
| C(13)-O(4)-H(17) | 109.5    |
| C(21)-O(6)-C(20) | 118.1(3) |
| O(1)-C(1)-C(2)   | 125.1(3) |
| O(1)-C(1)-N(1)   | 118.7(3) |
| C(2)-C(1)-N(1)   | 116.2(3) |
| C(3)-C(2)-C(1)   | 121.7(3) |
| C(3)-C(2)-H(1)   | 121(2)   |
| C(1)-C(2)-H(1)   | 117(2)   |
| C(2)-C(3)-C(16)  | 120.9(3) |
| C(2)-C(3)-C(4)   | 116.9(3) |
| C(16)-C(3)-C(4)  | 122.2(3) |
| O(2)-C(4)-C(5)   | 122.2(3) |
| O(2)-C(4)-C(3)   | 120.5(3) |
| C(5)-C(4)-C(3)   | 117.4(3) |
| C(6)-C(5)-C(14)  | 121.5(3) |
| C(6)-C(5)-C(4)   | 118.6(3) |
| C(14)-C(5)-C(4)  | 119.9(3) |
| C(5)-C(6)-C(7)   | 120.2(3) |

|                   |          |
|-------------------|----------|
| C(5)-C(6)-H(2)    | 119.9    |
| C(7)-C(6)-H(2)    | 119.9    |
| C(8)-C(7)-C(12)   | 120.5(3) |
| C(8)-C(7)-C(6)    | 119.7(3) |
| C(12)-C(7)-C(6)   | 119.8(3) |
| C(9)-C(8)-C(7)    | 119.3(4) |
| C(9)-C(8)-H(3)    | 120.3    |
| C(7)-C(8)-H(3)    | 120.3    |
| C(8)-C(9)-C(10)   | 121.1(3) |
| C(8)-C(9)-H(4)    | 116(2)   |
| C(10)-C(9)-H(4)   | 123(2)   |
| C(11)-C(10)-C(9)  | 121.1(4) |
| C(11)-C(10)-H(5)  | 117(3)   |
| C(9)-C(10)-H(5)   | 122(3)   |
| O(3)-C(11)-C(10)  | 117.3(3) |
| O(3)-C(11)-C(12)  | 123.2(3) |
| C(10)-C(11)-C(12) | 119.4(3) |
| C(11)-C(12)-C(7)  | 118.5(3) |
| C(11)-C(12)-C(13) | 122.8(3) |
| C(7)-C(12)-C(13)  | 118.6(3) |
| O(4)-C(13)-C(14)  | 121.3(3) |
| O(4)-C(13)-C(12)  | 117.6(3) |
| C(14)-C(13)-C(12) | 121.1(3) |
| C(13)-C(14)-C(5)  | 118.8(3) |
| C(13)-C(14)-C(15) | 118.8(3) |
| C(5)-C(14)-C(15)  | 122.4(3) |
| O(5)-C(15)-C(14)  | 119.6(3) |
| O(5)-C(15)-C(16)  | 121.6(3) |
| C(14)-C(15)-C(16) | 118.8(3) |
| C(17)-C(16)-C(3)  | 118.6(3) |
| C(17)-C(16)-C(15) | 122.5(3) |
| C(3)-C(16)-C(15)  | 118.9(3) |
| N(1)-C(17)-C(16)  | 118.9(3) |
| N(1)-C(17)-C(18)  | 118.6(3) |
| C(16)-C(17)-C(18) | 122.6(3) |

|                   |           |
|-------------------|-----------|
| C(17)-C(18)-H(7)  | 107(3)    |
| C(17)-C(18)-H(8)  | 109(3)    |
| H(7)-C(18)-H(8)   | 110(4)    |
| C(17)-C(18)-H(9)  | 111(3)    |
| H(7)-C(18)-H(9)   | 111(4)    |
| H(8)-C(18)-H(9)   | 109(4)    |
| N(1)-C(19)-C(20)  | 111.4(3)  |
| N(1)-C(19)-H(10)  | 105.3(18) |
| C(20)-C(19)-H(10) | 116(2)    |
| N(1)-C(19)-H(11)  | 103(3)    |
| C(20)-C(19)-H(11) | 112(3)    |
| H(10)-C(19)-H(11) | 109(3)    |
| O(6)-C(20)-C(19)  | 107.4(3)  |
| O(6)-C(20)-H(12)  | 109(3)    |
| C(19)-C(20)-H(12) | 109(2)    |
| O(6)-C(20)-H(13)  | 112(2)    |
| C(19)-C(20)-H(13) | 108(2)    |
| H(12)-C(20)-H(13) | 112(3)    |
| O(7)-C(21)-O(6)   | 125.4(5)  |
| O(7)-C(21)-H(14)  | 126(2)    |
| O(6)-C(21)-H(14)  | 108(2)    |
| C(22)-O(9)-H(15)  | 107(4)    |
| O(8)-C(22)-O(9)   | 126.0(4)  |
| O(8)-C(22)-H(18)  | 135(3)    |
| O(9)-C(22)-H(18)  | 99(3)     |

Table S 15: Anisotropic displacement parameters ( $\text{\AA}^2 \times 10^3$ ) for pyxidicycline B formate ester (sh3811). The anisotropic displacement factor exponent takes the form:  $-2\pi^2[h^2 a^{*2}U^{11} + \dots + 2 h k a^* b^* U^{12}]$

|      | $U^{11}$ | $U^{22}$ | $U^{33}$ | $U^{23}$ | $U^{13}$ | $U^{12}$ |
|------|----------|----------|----------|----------|----------|----------|
| N(1) | 19(1)    | 20(2)    | 22(2)    | 1(1)     | 1(1)     | 1(1)     |
| O(1) | 39(2)    | 23(1)    | 32(2)    | -4(1)    | 8(1)     | 2(1)     |
| O(2) | 47(2)    | 32(1)    | 24(2)    | -1(1)    | 4(1)     | 3(1)     |
| O(3) | 32(1)    | 24(1)    | 25(2)    | -5(1)    | 3(1)     | -1(1)    |
| O(4) | 35(1)    | 21(1)    | 20(1)    | -2(1)    | 5(1)     | -1(1)    |

|              |       |       |       |       |        |       |
|--------------|-------|-------|-------|-------|--------|-------|
| <b>O(5)</b>  | 30(1) | 23(1) | 17(1) | -2(1) | 4(1)   | -1(1) |
| <b>O(6)</b>  | 27(1) | 51(2) | 34(2) | -7(2) | -1(1)  | 10(1) |
| <b>O(7)</b>  | 32(2) | 62(2) | 60(2) | -1(2) | -2(2)  | 16(1) |
| <b>C(1)</b>  | 22(2) | 25(2) | 22(2) | -2(2) | 4(2)   | 2(1)  |
| <b>C(2)</b>  | 19(2) | 29(2) | 18(2) | -2(2) | 2(2)   | 2(1)  |
| <b>C(3)</b>  | 13(1) | 21(2) | 18(2) | -1(1) | 0(1)   | 0(1)  |
| <b>C(4)</b>  | 17(2) | 27(2) | 15(2) | -2(2) | -1(1)  | 0(1)  |
| <b>C(5)</b>  | 15(2) | 24(2) | 17(2) | 0(1)  | -1(1)  | 2(1)  |
| <b>C(6)</b>  | 18(2) | 24(2) | 16(2) | 1(2)  | -2(1)  | 0(1)  |
| <b>C(7)</b>  | 14(1) | 23(2) | 21(2) | -1(2) | -3(1)  | 1(1)  |
| <b>C(8)</b>  | 22(2) | 24(2) | 20(2) | 2(2)  | -2(1)  | 0(1)  |
| <b>C(9)</b>  | 21(2) | 22(2) | 29(2) | 5(2)  | -4(2)  | 2(1)  |
| <b>C(10)</b> | 21(2) | 21(2) | 31(2) | -2(2) | -4(2)  | 2(1)  |
| <b>C(11)</b> | 16(2) | 22(2) | 24(2) | -1(2) | -4(1)  | 1(1)  |
| <b>C(12)</b> | 14(1) | 20(2) | 21(2) | 0(1)  | -4(1)  | 1(1)  |
| <b>C(13)</b> | 13(1) | 22(2) | 18(2) | 0(1)  | 0(1)   | -2(1) |
| <b>C(14)</b> | 13(1) | 19(2) | 18(2) | -2(1) | -4(1)  | 0(1)  |
| <b>C(15)</b> | 15(1) | 23(2) | 15(2) | 0(1)  | -4(1)  | 1(1)  |
| <b>C(16)</b> | 15(2) | 20(2) | 18(2) | -2(1) | -3(1)  | 1(1)  |
| <b>C(17)</b> | 12(1) | 21(2) | 19(2) | 0(1)  | -1(1)  | 1(1)  |
| <b>C(18)</b> | 27(2) | 23(2) | 19(2) | 2(2)  | 2(2)   | 4(1)  |
| <b>C(19)</b> | 26(2) | 22(2) | 30(2) | 2(2)  | 4(2)   | -2(1) |
| <b>C(20)</b> | 34(2) | 23(2) | 30(2) | 6(2)  | 4(2)   | 5(2)  |
| <b>C(21)</b> | 29(2) | 50(3) | 33(3) | 10(2) | 2(2)   | 8(2)  |
| <b>O(8)</b>  | 60(2) | 46(2) | 72(3) | -9(2) | -13(2) | 10(2) |
| <b>O(9)</b>  | 48(2) | 49(2) | 39(2) | 4(2)  | 11(2)  | 5(1)  |
| <b>C(22)</b> | 46(3) | 27(2) | 52(3) | 12(2) | 11(3)  | 4(2)  |

### 3.8 NMR based structure elucidation of the anthraquinone precursors

The chemical structures of the anthraquinone secondary metabolite precursors were determined via multidimensional NMR analysis.  $^1\text{H}$  NMR,  $^{13}\text{C}$  NMR and 2D spectra were recorded at 700 MHz ( $^1\text{H}$ )/175 MHz ( $^{13}\text{C}$ ) conducting an Ascend 700 spectrometer using a cryogenically cooled triple resonance probe (Bruker Biospin, Rheinstetten, Germany). Samples were dissolved in DMSO- $d_6$ , Acetone- $d_6$  and



Chloroform-d. Chemical shifts are reported in ppm relative to TMS, the solvent was used as the internal standard. NMR data are presented in tabulated form by ascending  $^{13}\text{C}$  shifts.

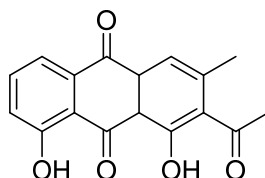

Figure S 19: Structure formula of anthraquinone 296

Table S 16: Tabulated NMR data of the anthraquinone 296 in  $\text{DMSO-d}_6$

| $^1\text{H}$ | J, Multiplicity, Nb. of H | $^{13}\text{C}$ | H-H Cosy         | HMBC                                     | ROESY |
|--------------|---------------------------|-----------------|------------------|------------------------------------------|-------|
| 2.38         | s, 3H                     | 20.5            | 7.66             | 114.3; 122.5; 136.4; 105.8; 159.6; 203.2 | 7.66  |
| 2.59         | s, 3H                     | 32.1            | 7.66             | 203.1; 136.4                             | -     |
| -            | -                         | 114.3           | -                | -                                        | -     |
| -            | -                         | 116.0           | -                | -                                        | -     |
| 7.82         | 1.15; 7.45, dd, 2H        | 120.5           | 7.30; 7.69; 7.66 | 116.0; 125.2; 181.6                      | -     |
| 7.66         | 7.45; 8.48, dd, 2H        | 137.6           | 2.38, 7.82       | 114.3; 136.5; 181.6; 203.1; 20.5         | 2.38  |
| 7.3          | 1.2; 8.48, dd, 2H         | 125.2           | 7.69, 7.82       | 116.0; 120.6; 136.4                      | -     |
| -            | -                         | 133.3           | -                | -                                        | -     |
| -            | -                         | 133.6           | -                | -                                        | -     |
| -            | -                         | 136.4           | -                | -                                        | -     |
| 7.69         | s, 1H                     | 122.5           | 7.30; 7.69; 7.82 | 162.8; 133.6                             | -     |
| -            | -                         | 145.8           | -                | -                                        | -     |
| -            | -                         | 159.6           | -                | -                                        | -     |
| -            | -                         | 162.8           | -                | -                                        | -     |
| -            | -                         | 181.6           | -                | -                                        | -     |
| -            | -                         | 192.8           | -                | -                                        | -     |
| -            | -                         | 203.1           | -                | -                                        | -     |
| 11.96        | s, 1H                     | -               | 7.69             | 116.0; 125.2; 162.8; 120.0; 192.8        | -     |
| 12.34        | s, 1H                     | -               | 7.66; 2.59       | 114.3; 136.4; 159.6; 20.5; 192.8         | -     |

2D NMR data shown is in good agreement with published structure of protetrone<sup>13</sup>.

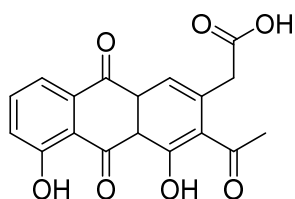

Figure S 20: Structure formula of anthraquinone 340

Table S 17: Tabulated NMR data of the anthraquinone 340 in Acetone- $d_6$

| $^1\text{H}$ | J, Multiplicity, Nb. of H | $^{13}\text{C}$ |
|--------------|---------------------------|-----------------|
| 2.61         | s, 3H                     | 31.7            |
| 3.93         | s, 2H                     | 38.7            |
| 7.82         | 1.4; 7.0, dd, 1H          | 120.2           |
| 7.79         | 7.0; 8.0, dd, 1H          | 122.9           |
| 7.4          | 1.0; 8.0, dd, 1H          | 125.2           |
| 7.87         | s, 1H                     | 138.4           |

Acquired NMR data in good agreement with NMR data published by Zhang et al. <sup>14</sup>.

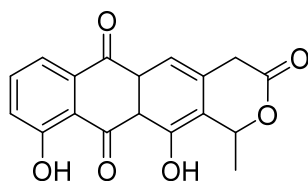

Figure S 21: Structure formula of anthraquinone 324

Table S 18: Tabulated NMR data of the anthraquinone 324 in Chloroform- $d$

| $^1\text{H}$ | J, Multiplicity, Nb. of H | $^{13}\text{C}$ | H-H Cosy          | HMBC                              |
|--------------|---------------------------|-----------------|-------------------|-----------------------------------|
| 1.66         | d                         | 20.8            | 5.98              | 73.7, 130.2                       |
| 3.86 + 3.82  | 2 x s                     | 34.6            | 7.63              | 118.8, 130.4, 139.3, 167.9        |
| 5.98         | 6.90, q, 1H               | 73.7            | 1.66, 3.82        | 20.7, 130.4, 139.3, 157.6, 167.9  |
| -            |                           | 114.6           |                   |                                   |
| -            |                           | 115.6           |                   |                                   |
| 7.63         | s, 1H                     | 118.6           | 3.86, 3.82        | 34.6, 114.6, 130.2, 181.5, 197.2  |
| 7.83         | 0.9; 8.5, dd, 1H          | 120.4           | 7.69, 7.31        | 115.6, 125.4, 162.8, 181.5, 192.7 |
| 7.31         | 1; 8.5, dd, 1H            | 125.1           | 7.69, 7.83        | 115.6, 120.4, 162.8, 192.7        |
| -            |                           | 130.2           |                   |                                   |
| -            |                           | 133.2           |                   |                                   |
| 7.69         | 7.4; 8.5, dd, 1H          | 137.6           | 7.31, 7.83, 11.94 | 115.6, 133.2, 162.8, 181.5        |
| -            |                           | 139.3           |                   |                                   |
| -            |                           | 157.6           |                   |                                   |

|       |       |       |      |                                   |
|-------|-------|-------|------|-----------------------------------|
| -     | -     | 167.9 | -    | -                                 |
| -     | -     | 162.8 | -    | -                                 |
| -     | -     | 181.5 | -    | -                                 |
| -     | -     | 192.7 | -    | -                                 |
| -     | -     | 197.2 | -    | -                                 |
| 11.94 | s, 1H | -     | 7.69 | 115.6, 125.0, 137.7, 162.8, 192.7 |
| 12.46 | s, 1H | -     | -    | 114.6, 130.2, 139.3, 157.6, 192.7 |

2D NMR data obtained in from anthraquinone 324 in good agreement with published NMR data for ekatetrone <sup>15</sup>.

### 3.9 Tandem MS based structure assignment of anthraquinone 340

Due to poor stability of anthraquinone 340 in most NMR solvents, which led to decarboxylation of the compound to anthraquinone 296 via decarboxylation, only a <sup>1</sup>H and HSQC spectrum were recorded for this compound. To ascertain that the seen anthraquinone possesses the proposed structure, the first fragments of the LC-MS<sup>2</sup> spectrum recorded on the HPLC coupled maXis 4G qTOF spectrometer (section S 3.3) are interpreted.

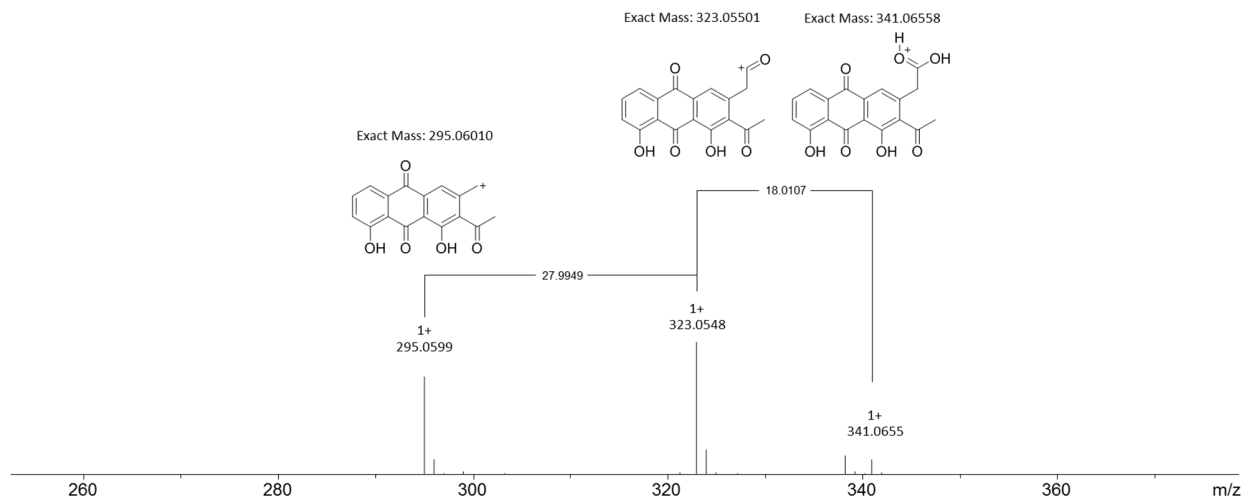

Figure S 22: MS<sup>2</sup> spectrum of anthraquinone 340 with proposed gas phase dissociation reactions acquired during an LC-MS<sup>2</sup> run of *Pyxidicoccus fallax* And48 pcyA::pSBtn5 pcyA extract on the HPLC coupled maXis 4G qTOF spectrometer

One can clearly see the MS<sup>2</sup> fragments fitting the proposed structure that is also in accord with the reference NMR data. Furthermore, as this scaffold would indeed favor decarboxylation in solution to anthraquinone 296 as it is observed during longer NMR experiments one can safely assume the anthraquinone 340 to have the presented structure.

### 3.10 Tandem MS based assignment of the incorporated deuterium atoms into Pyxidicycline A

10 mmol 1,2 Ethanolamine  $^{13}\text{C}_2$ , 2,2-Glycine- $\text{d}_2$  and 2,3,3-serine- $\text{d}_3$  are fed into a 25 ml CTT medium culture of *M. xanthus* attB :: attP pCIY pyxidicycline cluster in order to observe isotopic labelling of the pyxidicyclines. Extracts were prepared according to standard protocol (section S 3.2) and analyzed via standardized UPLC-MS and UPLC-MS<sup>2</sup> (section S 3.3). Only feeding of 3,3,2-serine- $\text{d}_3$  into *M. xanthus* DK1622 attB::attP pCIY pyxidicycline cluster reveals strong labelling of the pyxidicyclines. To prove the incorporation into the side chain of the pyxidicyclines as it was hypothesized in the biosynthesis proposal backed up with labelling experiments the labelled compound is subjected to tandem MS measurements.

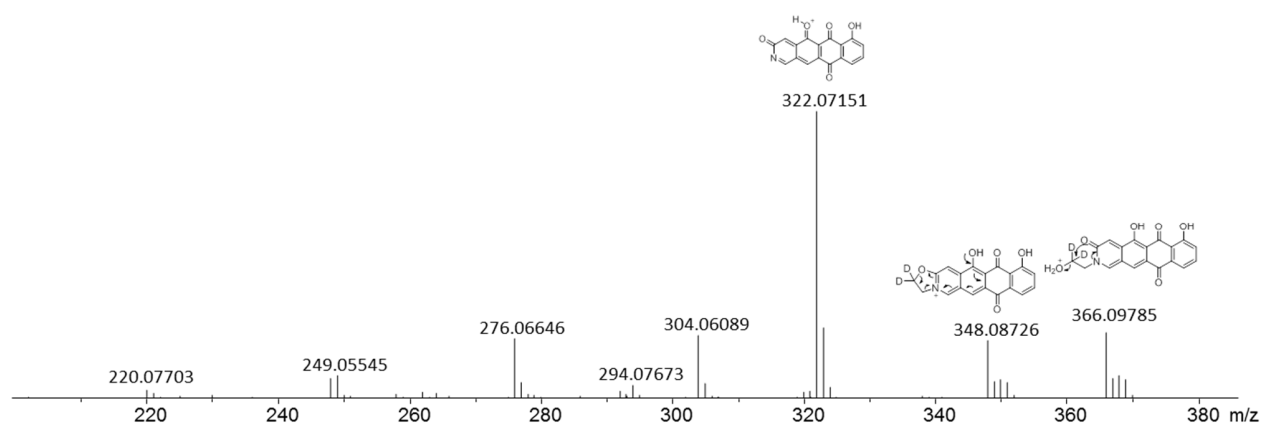

Figure S 23: LC-MS<sup>2</sup> CID-fragmentation pattern of  $\text{d}_2$  labelled pyxidicycline A from *M. xanthus* DK1622 attB :: attP pCIY pyxidicycline with proposed gas phase reaction acquired on the HPLC coupled maXis 4G qTOF spectrometer

As the molecule fragment with the mass of 322.0715 Daltons lost the deuterium atoms as visible by the isotope pattern one can assume that both deuterium atoms are present on this 2-hydroxyethyl side chain. This fits well with the molecule's structure as one would assume the linear 2-hydroxyethyl side chain to be the most labile part in CID based MS<sup>2</sup> experiments that likely fragments according to the gas phase reactions proposed in Figure S 23. One can therefore experimentally prove the incorporation of serine into the structure.

### 3.11 NMR based structure elucidation of the pyxidicyclines

As the pyxidicyclines are only soluble in DMSO and DMF that both unfortunately lead to degradation of the compound over time, NMR data is acquired in formic acid- $\text{d}_2$ . The pyxidicyclines readily and reversibly form formate esters that are soluble in formic acid.  $^1\text{H}$  NMR,  $^{13}\text{C}$  NMR and 2D spectra were

recorded at 700 MHz ( $^1\text{H}$ )/175 MHz ( $^{13}\text{C}$ ) conducting an Ascend 700 spectrometer using a cryogenically cooled triple resonance probe (Bruker Biospin, Rheinstetten, Germany). Samples were dissolved in formic acid- $d_2$ . Chemical shifts are reported in ppm relative to TMS, the solvent was used as the internal standard. NMR reference information for formic acid is taken from Roy Hoffmann.<sup>16</sup> Carbon numbering for NMR signal assignment purposes is done in a biosynthetic logic meaning that the carbon first integrated into the structure obtains the first number.

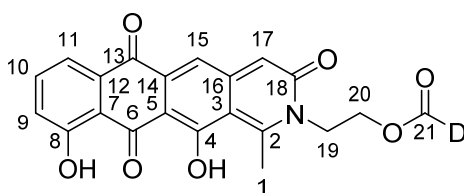

Figure S 24: Carbon numbering for NMR assignment purposes for pyxidicycline A formate ester

Table S 19: Tabulated NMR data of pyxidicycline A formate ester acquired in formic acid- $d_2$ . Carbon numbering is done according to the scheme in Figure S 24.

| C Number | $^1\text{H}$ | J, Multiplicity, Nb of H | $^{13}\text{C}$ | H-H Cosy   | HMBC                                     |
|----------|--------------|--------------------------|-----------------|------------|------------------------------------------|
| 1        | 3.57         | s, 3H                    | 21.4            | 7.56       | 108.5, 116.2, 157.5, 168.8               |
| 2        | -            | -                        | 125.5           | -          | -                                        |
| 3        | -            | -                        | 116.2           | -          | -                                        |
| 4        | -            | -                        | 168.8           | -          | -                                        |
| 5        | -            | -                        | 109.3           | -          | -                                        |
| 6        | -            | -                        | 190.6           | -          | -                                        |
| 7        | -            | -                        | 116             | -          | -                                        |
| 8        | -            | -                        | 162.7           | -          | -                                        |
| 9        | 7.41         | n.d.; 8.3, dd, 1H        | 125.7           | 7.81, 7.86 | 116.0, 120.6, 162.0                      |
| 10       | 7.81         | 7.3; 8.3, dd, 1H         | 137.8           | 7.41, 7.86 | 116.0, 133.6, 162.0                      |
| 11       | 7.86         | n.d.; 7.3, dd, 1H        | 120.6           | 7.41, 7.81 | 116.0, 125.7, 137.8, 182.2, 190.6        |
| 12       | -            | -                        | 133.6           | -          | -                                        |
| 13       | -            | -                        | 182.2           | -          | -                                        |
| 14       | -            | -                        | 126.6           | -          | -                                        |
| 15       | 8.05         | s, 1H                    | 118.4           | 3.57, 7.56 | 108.5, 109.3, 116.2, 145.5, 182.2, 190.6 |
| 16       | -            | -                        | 145.4           | -          | -                                        |
| 17       | 7.56         | s, 1H                    | 108.5           | 8.05       | 116.2, 125.5, 126.6, 157.5, 162.5, 168.8 |
| 18       | -            | -                        | 157.5           | -          | -                                        |
| 19       | 5.14         | 5.30, t, 2H              | 47.4            | 4.81       | 60.8, 157.5, 162.5                       |
| 20       | 4.81         | 5.30, t, 2H              | 60.8            | 5.14       | 47.4, 162.5, 163.3                       |
| FA C21   | -            | -                        | 163.3           | -          | -                                        |

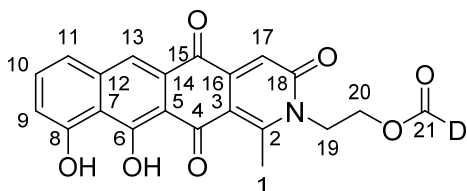

Figure S 25: Carbon numbering for NMR assignment purposes for pyxidicycline B formate ester

Table S 20: Tabulated NMR data of pyxidicycline B formate ester acquired in formic acid- $d_2$ . Carbon numbering is done according to the scheme in Figure S 25.

| C Number | $^1\text{H}$ | J, Multiplicity, Nb of H | $^{13}\text{C}$ | H-H Cosy   | HMBC                                                          | ROESY      |
|----------|--------------|--------------------------|-----------------|------------|---------------------------------------------------------------|------------|
| 1        | 3.23         | s, 3H                    | 19.1            | 7.38       | 113.2, 114.8, 142.2, 159.8, 164.5, 186.4                      | 4.74, 4.65 |
| 2        | -            | -                        | 159.8           | -          | -                                                             | -          |
| 3        | -            | -                        | 113.2           | -          | -                                                             | -          |
| 4        | -            | -                        | 186.4           | -          | -                                                             | -          |
| 5        | -            | -                        | 124.1           | -          | -                                                             | -          |
| 6        | -            | -                        | 165.1           | -          | -                                                             | -          |
| 7        | -            | -                        | 108.7           | -          | -                                                             | -          |
| 8        | -            | -                        | 157.2           | -          | -                                                             | -          |
| 9        | 7.1          | 7.9, d, 1H               | 115.8           | 7.54, 7.64 | 116.0, 122.7, 157.2                                           | -          |
| 10       | 7.64         | 7.9; 8.0, dd, 1H         | 133.5           | 7.10, 7.54 | 115.8, 122.7, 137.2, 157.2                                    | -          |
| 11       | 7.54         | 8.0, d, 1H               | 122.7           | 7.10, 7.64 | 115.8, 123.0, 137.2, 157.2, 165.1                             | -          |
| 12       | -            | -                        | 137.2           | -          | -                                                             | -          |
| 13       | 8.15         | s, 1H                    | 123             | 7.53       | 108.7, 115.8, 122.7, 124.1, 137.2, 157.2, 165.1, 181.3, 186.4 | -          |
| 14       | -            | -                        | n.d.            | -          | -                                                             | -          |
| 15       | -            | -                        | 181.2           | -          | -                                                             | -          |
| 16       | -            | -                        | 142.2           | -          | -                                                             | -          |
| 17       | 7.38         | s, 1H                    | 114.8           | 3.23       | 113.2, 142.2, 164.5, 181.6                                    | -          |
| 18       | -            | -                        | 164.5           | -          | -                                                             | -          |
| 19       | 4.74         | 5.52, t, 2H              | 44.5            | 4.65       | 61.1, 159.8, 164.5                                            | 3.23       |
| 20       | 4.65         | 5.52, t, 2H              | 61.2            | 4.74       | 44.5, 163.0                                                   | 3.23       |
| FA C21   | -            | -                        | 163             | -          | -                                                             | -          |

### 3.12 Comparison of production levels for pyxidicycline and pyxidicycline precursors

Table S 21 summarizes the relative and absolute peak areas measured on the UHPLC coupled maXis 4G spectrometer system by injection of 0.5 µL of crude extract of the respective species grown and extracted according to standard protocol described in section 3.1 to 3.3. Fold-change values (in blue) show the relative production titres for pyxidicyclines A (**1**) and B (**2**), relative to the base yield from promotor-activated strain named And48 *pcy* in the main text (table row highlighted with blue background). The isolated yields from this producer are 416 µg/L (Pyx A, **1**) and 333 µg/L (Pyx B, **2**), respectively (see section S3). The last five columns contain calculated ratios to illustrate the effect of expression in different hosts or gene deletions upon pyxidicycline expression.

Table S 21: Comparative peak area analysis measured in [cts x min] of the pyxidicyclines and its precursors in all generated producer strains measured by integration the [M+H]<sup>+</sup> EIC in the standard LC-MS chromatogram setting (section S 3.3). The two anthraquinone metabolites are measured as LC-MS EIC peak area at 341.06 [M+H]<sup>+</sup>, 325.07 [M+H]<sup>+</sup> and 297.075 [M+H]<sup>+</sup>, the two pyxidicyclines are measured as LCMS EIC peak areas at 366.10 [M+H]<sup>+</sup>.

| Producer strain                                                                                       | Area Pyx A (1) | Pyx A fold-change | Area Pyx B (2) | Pyx B fold-change | Area AQ 340 (3) | Area AQ 324 (4) | Area AQ 296 (5) | Area Pyx A / Area AQ 340 | Area Pyx B / Area AQ 340 | Area Pyx A / Area AQ 296 | Area Pyx B / Area AQ 296 | Area Pyx A / Area Pyxi B |
|-------------------------------------------------------------------------------------------------------|----------------|-------------------|----------------|-------------------|-----------------|-----------------|-----------------|--------------------------|--------------------------|--------------------------|--------------------------|--------------------------|
| <i>P. fallax</i> And48<br><i>pcyA</i> :: pSBtn5 <i>pcyA</i>                                           | -              |                   | -              |                   | 1135792         | 119418          | 226789          | -                        | -                        | -                        | -                        | -                        |
| <i>P. fallax</i> And48<br><i>pcyA</i> :: pFPVAn <i>pcyA</i>                                           | -              |                   | -              |                   | 129491          | 13364           | 151052          | -                        | -                        | -                        | -                        | -                        |
| <i>P. fallax</i> And48<br><i>pcyA</i> :: pFPVAn <i>pcyA</i> ;<br><i>pcyJ</i> :: pFPtettn5 <i>pcyJ</i> | 1905806        | 1                 | 1859927        | 1                 | 15991           | -               | 1119844         | 119.18                   | 116.31                   | 1.70                     | 1.66                     | 1.02                     |
| <i>M. xanthus</i> DK1622<br>attB :: attP Pyxidicycline Cluster                                        | 1157822        | 0.61              | 2240664        | 1.18              | 126015          | -               | 540949          | 9.19                     | 17.78                    | 2.14                     | 4.14                     | 0.52                     |
| <i>M. xanthus</i> DK1622<br>attB :: attP Pyxidicycline Cluster Δ <i>pcyJ</i>                          | -              |                   | -              |                   | 1173697         | -               | 1580399         | -                        | -                        | -                        | -                        | -                        |
| <i>M. xanthus</i> DK1622<br>attB :: attP Pyxidicycline Cluster Δ <i>pcyK</i>                          | 170034         | 0.09              | 137566         | 0.07              | 1156196         | -               | 2065290         | 0.15                     | 0.12                     | 0.08                     | 0.07                     | 1.24                     |
| <i>M. xanthus</i> DK1622<br>attB :: attP Pyxidicycline Cluster Δ <i>pcyL</i>                          | 153049         | 0.08              | 132066         | 0.07              | 1202235         | -               | 2301855         | 0.13                     | 0.11                     | 0.07                     | 0.06                     | 1.16                     |
| <i>M. xanthus</i> DK1622<br>attB :: attP Pyxidicycline Cluster T7A1 <i>pcyO</i>                       | 1400366        | 0.74              | 3180800        | 1.67              | 365870          | -               | 399734          | 3.83                     | 8.69                     | 3.50                     | 7.96                     | 0.44                     |
| <i>S. aurantiaca</i> DW 4/3-1<br>attB :: attP Pyxidicycline Cluster                                   | 75069          | 0.04              | 290585         | 0.15              | 102942          | -               | 75896           | 0.73                     | 2.82                     | 1.36                     | 3.83                     | 0.26                     |







# 4 Bioactivity profiling of the pyxidicyclines and its precursors

## 4.1 Cell based biological assays to valuate MIC values on bacteria and cancer cell lines

### 4.1.1 Antimicrobial Assay

All microorganisms were handled according to standard procedures and were obtained from the German Collection of Microorganisms and Cell Cultures (*Deutsche Sammlung für Mikroorganismen und Zellkulturen*, DSMZ) or were part of our internal strain collection. For microdilution assays, overnight cultures of Gram-positive bacteria in Müller-Hinton broth (0.2 % (w/v) beef infusion, 0.15 % (w/v) corn starch, 1.75 % (w/v) casein peptone; pH 7.4) were diluted in the growth medium to achieve a final inoculum of ca.  $10^6$  cfu ml<sup>-1</sup>. Serial dilutions of pyxidicyclines and the anthraquinone precursors were prepared from freshly prepared DMSO or Methanol stocks in sterile 96-well plates. The cell suspension was added and microorganisms were grown on a microplate shaker (750 rpm, 37°C and 16 h). Growth inhibition was assessed by visual inspection and given MIC (minimum inhibitory concentration) values are the lowest concentration of antibiotic at which no visible growth was observed.

### 4.1.2 Cytotoxic Activity

Cell lines were obtained from the German Collection of Microorganisms and Cell Cultures (*Deutsche Sammlung für Mikroorganismen und Zellkulturen*, DSMZ) or were part of our internal collection and were cultured under conditions recommended by the depositor. Cells were seeded at  $6 \times 10^3$  cells per well of 96-well plates in 180 µl complete medium and treated with pyxidicyclines in serial dilution after 2 h of equilibration. Each compound was tested in duplicate as well as the internal solvent control. After 5 d incubation, 20 µl of 5 mg ml<sup>-1</sup> MTT (thiazolyl blue tetrazolium bromide) in PBS was added per well and it was further incubated for 2 h at 37°C. The medium was discarded and cells were washed with 100 µl PBS before adding 100 µl 2-propanol/10 N HCl (250:1) in order to dissolve formazan granules. The absorbance at 570 nm was measured using a microplate reader (Tecan Infinite M200Pro), and cell viability was expressed as percentage relative to the respective methanol control. IC<sub>50</sub> values were determined by sigmoidal curve fitting.

## 4.2 Topoisomerase inhibition assays performed to determine the target of the pyxidicyclines

All topoisomerase related inhibition assays were performed using topoisomerase inhibition evaluation kits for *E. coli* topoisomerase II, *E. coli* topoisomerase IV and human topoisomerase I supplied by Inspiralis (Inspiralis Ltd., Norwich, U.K.). The kits were used according to the manuals. All compounds were tested as freshly prepared DMSO solutions. Pyxidicyclines were assayed to be stable in DMSO for about 12 hours. Topoisomerase inhibition assays were evaluated by agarose gel electrophoresis using 0.8 % agarose gels in 1x TAE buffer. Total volume of the assay reaction was 30  $\mu$ L. All assays are carried out in a 96 well micro titer plate.

### Inspiralis *E. coli* DNA gyrase inhibition assay

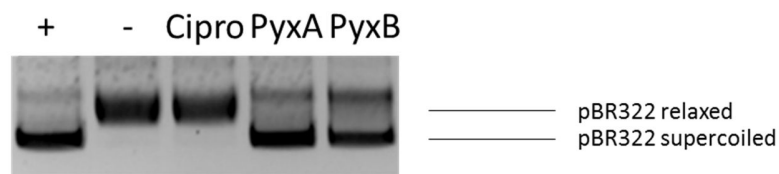

positive control, negative control, Ciprofloxacin 60 $\mu$ g/ml  
Pyxidicycline A 50 $\mu$ g/ml, Pyxidicycline B 50 $\mu$ g/ml

Figure S 26: *E. coli* DNA gyrase inhibition assay, positive control is 0.5% DMSO, negative control is assay without enzyme; Ciprofloxacin, pyxidicycline A and pyxidicycline B are supplied in DMSO to a total concentration of 0.5% DMSO and the stated end concentrations in the assay

## Inspiralis *E. coli* topoisomerase IV inhibition Assay

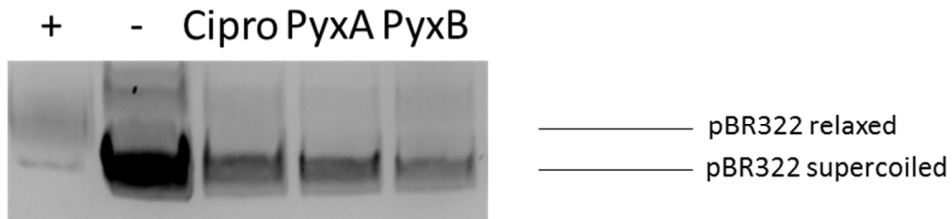

positive control, negative control, Ciprofloxacin 60µg/ml,  
 Pyxidicycline A 50µg/ml, Pyxidicycline B 50µg/ml

### *E. coli* topoisomerase IV IC50 Pyxidicycline A

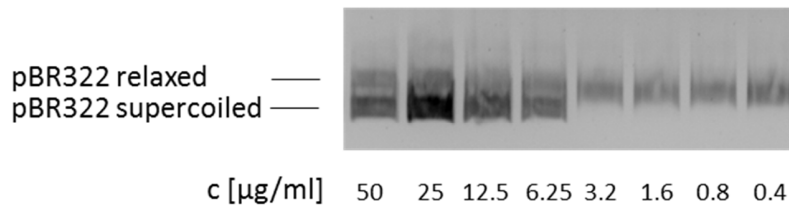

### *E. coli* topoisomerase IV IC50 Pyxidicycline B

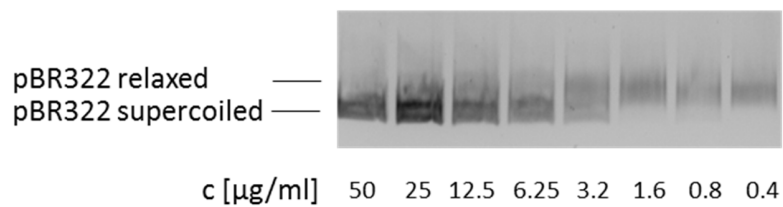

Figure S 27: *E. coli* DNA topoisomerase IV inhibition assay, positive control is 0.5% DMSO, negative control is assay without enzyme; Ciprofloxacin, pyxidicycline A and pyxidicycline B are supplied in DMSO to a total concentration of 0.5% DMSO and the stated end concentrations in the assay

## Inspiralis Human topoisomerase I inhibition assay

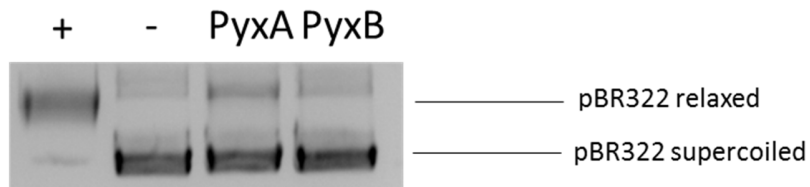

positive control, negative control  
Pyxidicycline A 50 $\mu$ g/ml, Pyxidicycline B 50 $\mu$ g/ml

### Human topoisomerase I IC<sub>50</sub> Pyxidicycline A

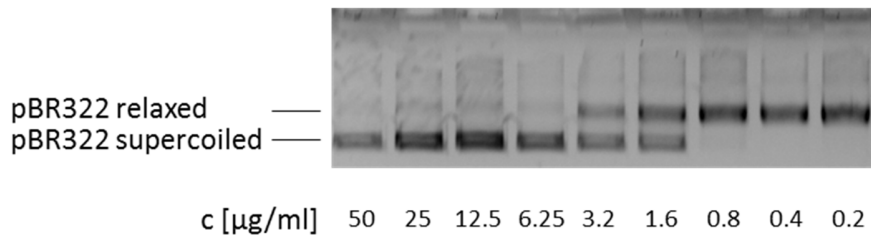

### Human topoisomerase I IC<sub>50</sub> Pyxidicycline B

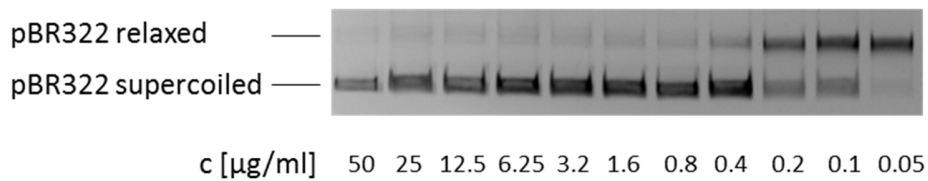

Figure S 28: Human DNA topoisomerase I inhibition assay, positive control is 0.5% DMSO, negative control is assay without enzyme, pyxidicycline A and pyxidicycline B are supplied in DMSO to a total concentration of 0.5% DMSO and the stated end concentrations in the assay



## **5 NMR spectra of the pyxidicyclines and their precursor molecules**

Anthraquinone 296

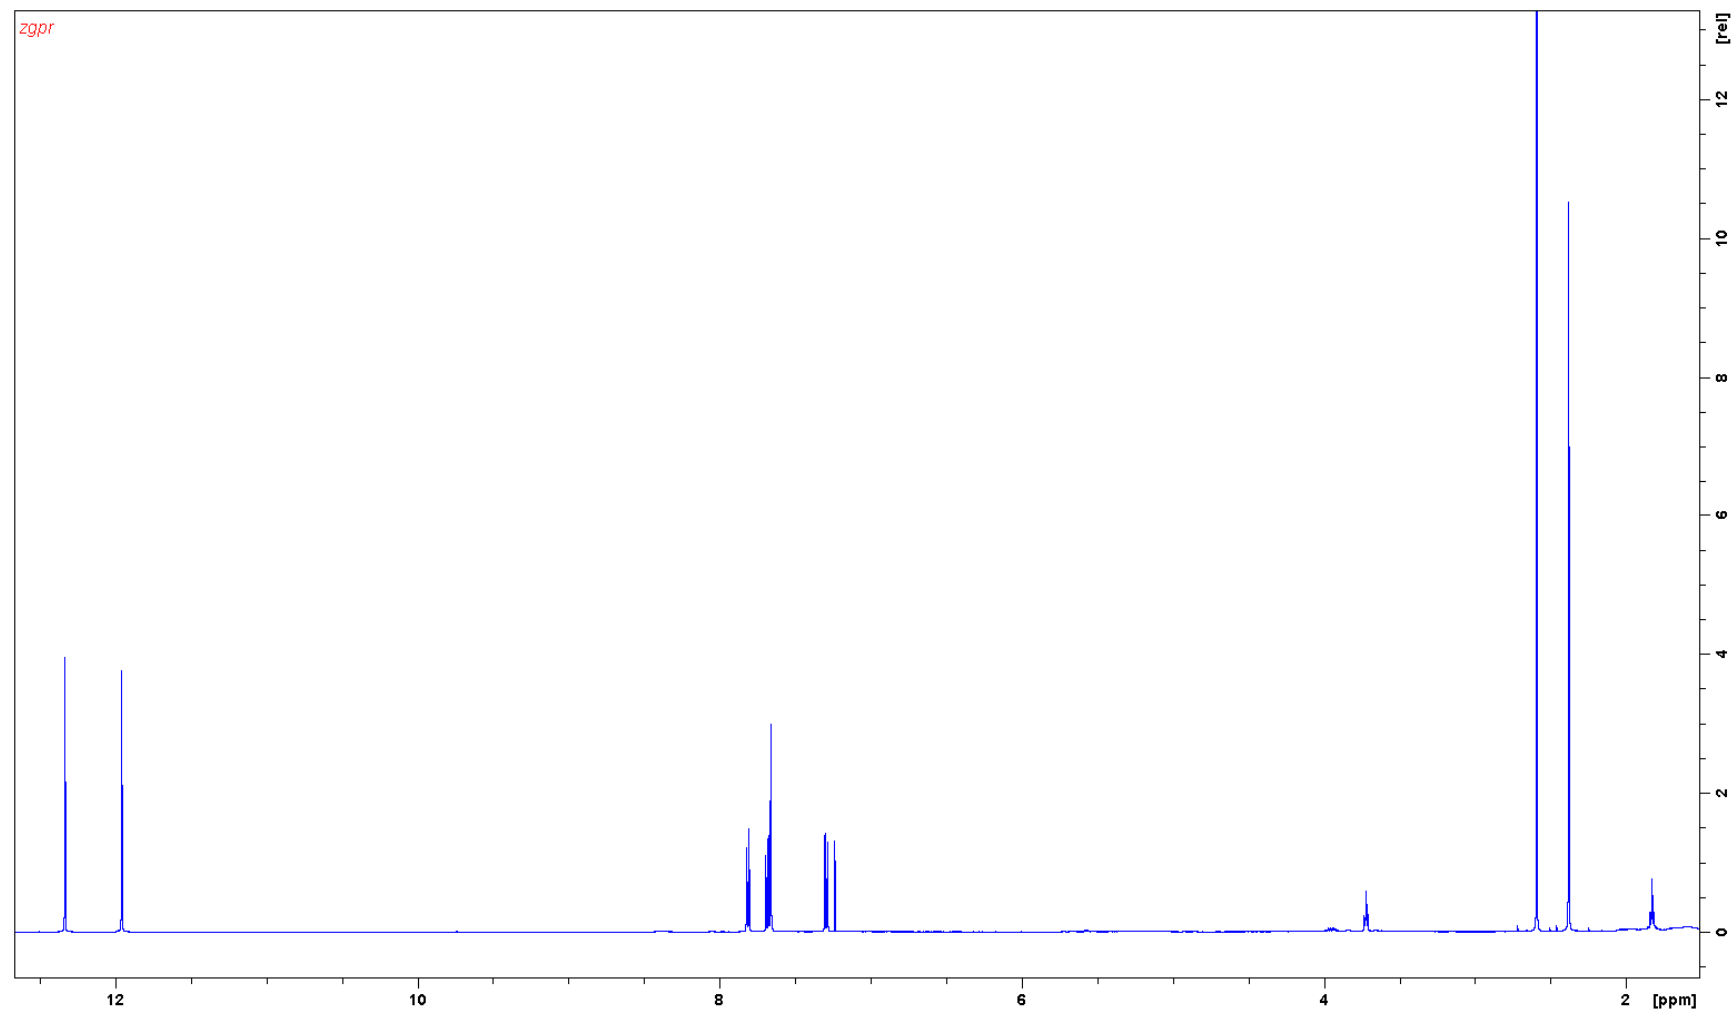

Figure S 29:  $^1\text{H}$  NMR spectrum of anthraquinone 296 in  $\text{DMSO-d}_6$



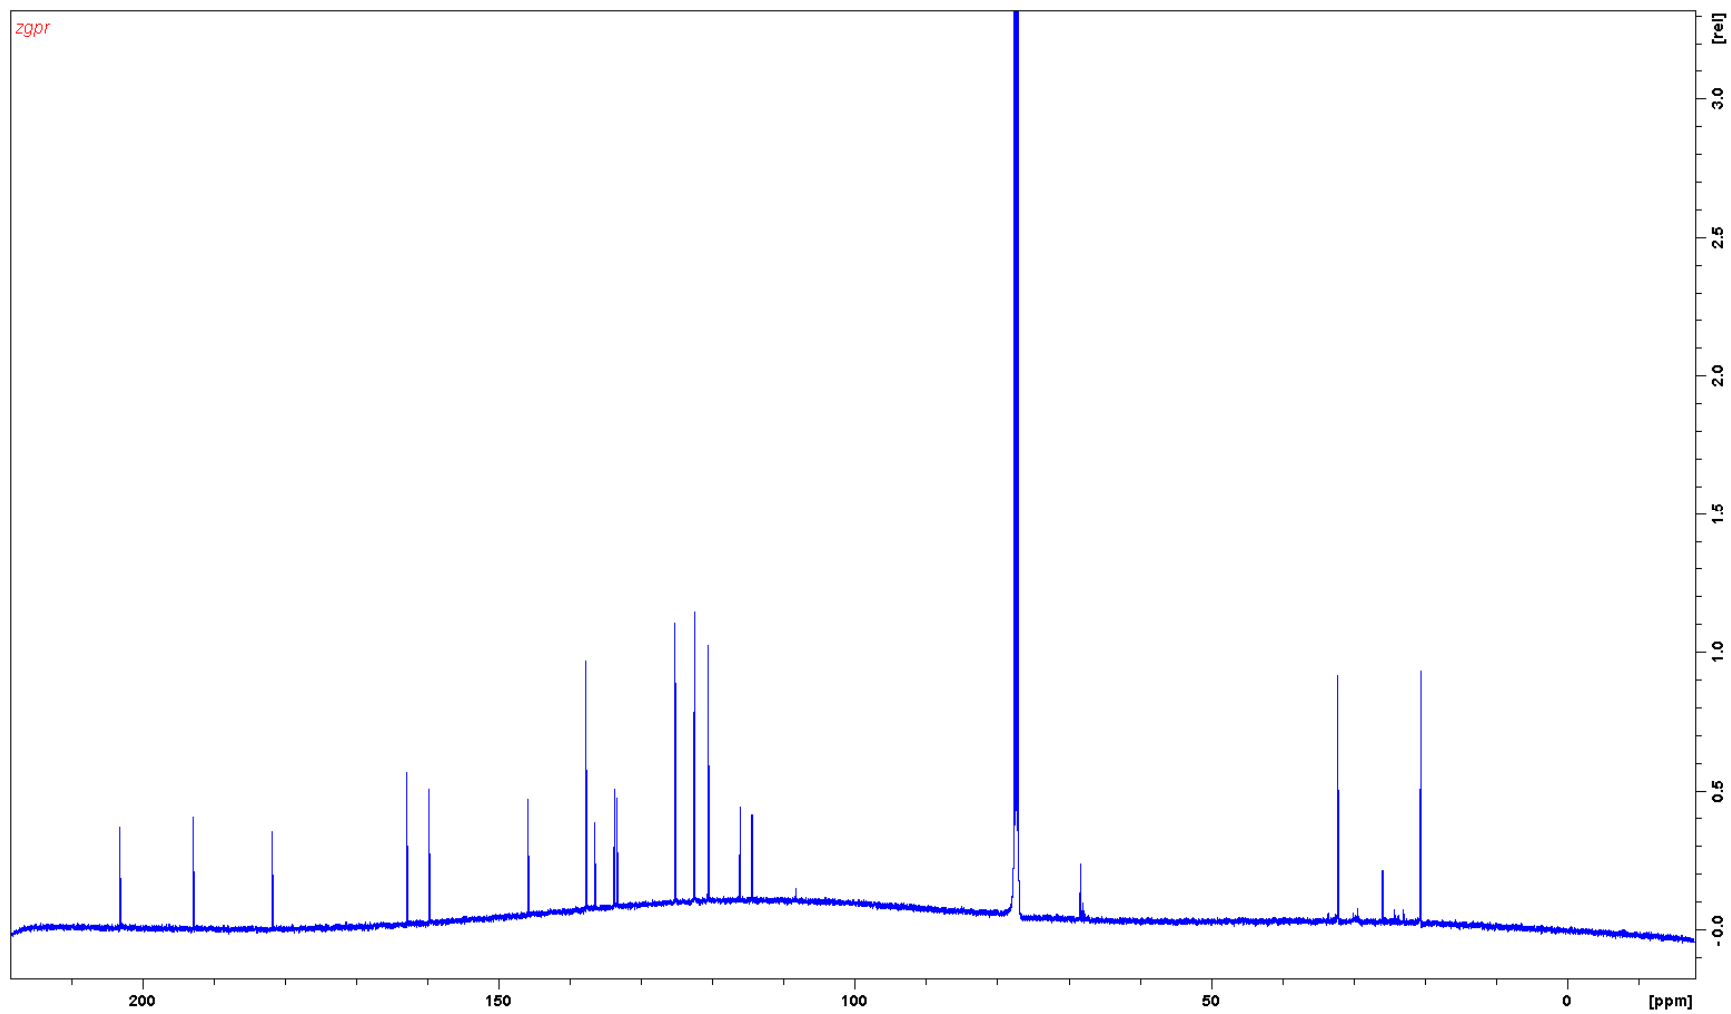

Figure S 30:  $^{13}\text{C}$  NMR spectrum of anthraquinone 296 in  $\text{DMSO-d}_6$

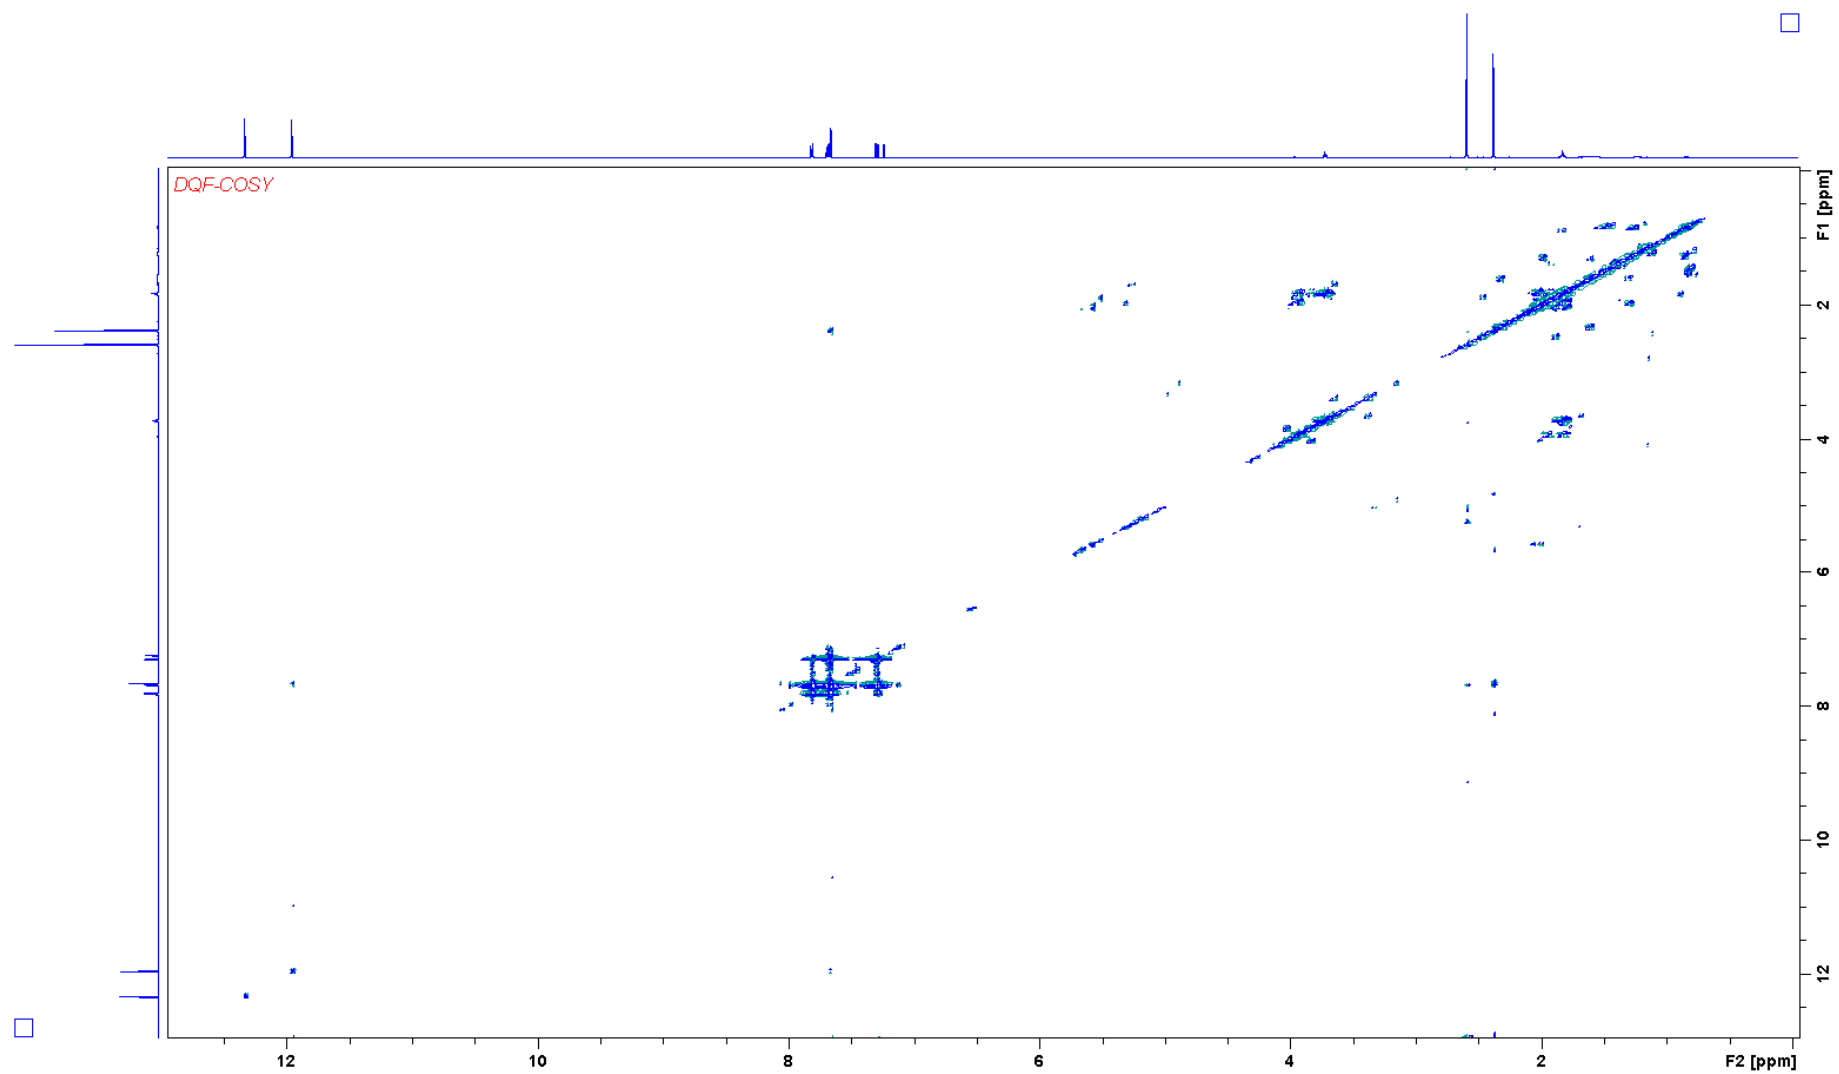

Figure S 31: DQF COSY NMR spectrum of anthraquinone 296 in DMSO- $d_6$

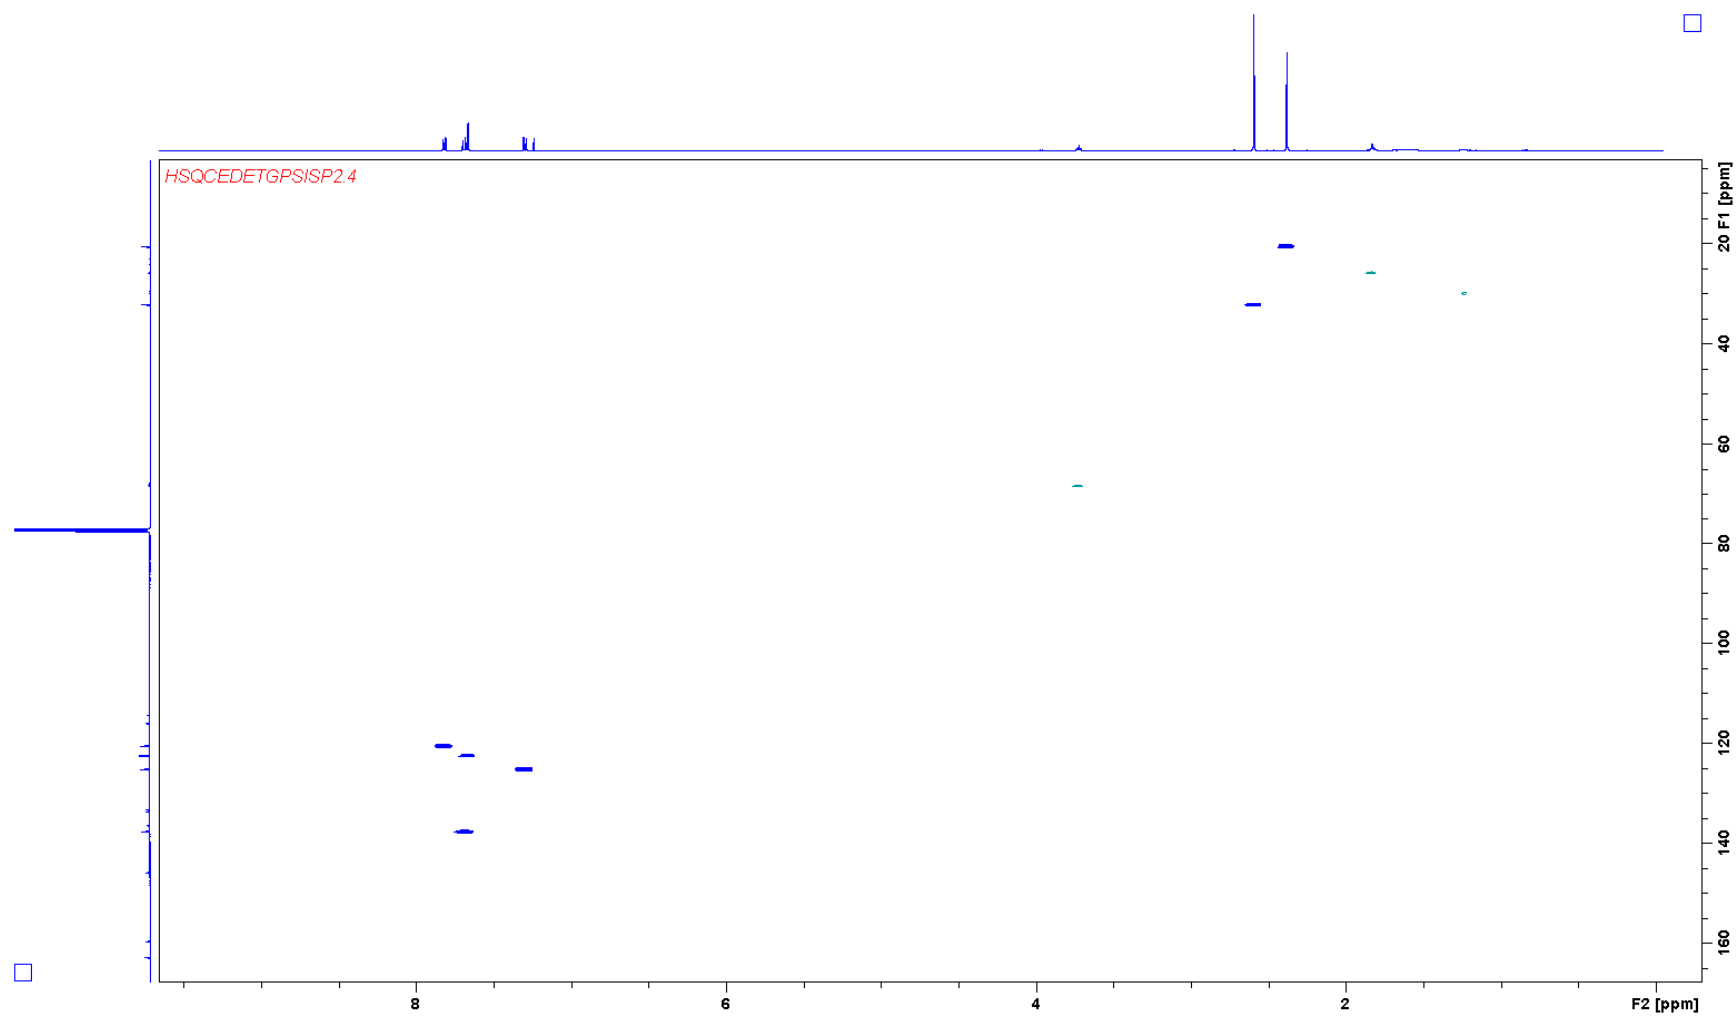

Figure S 32: HSQC NMR spectrum of anthraquinone 296 in DMSO- $d_6$

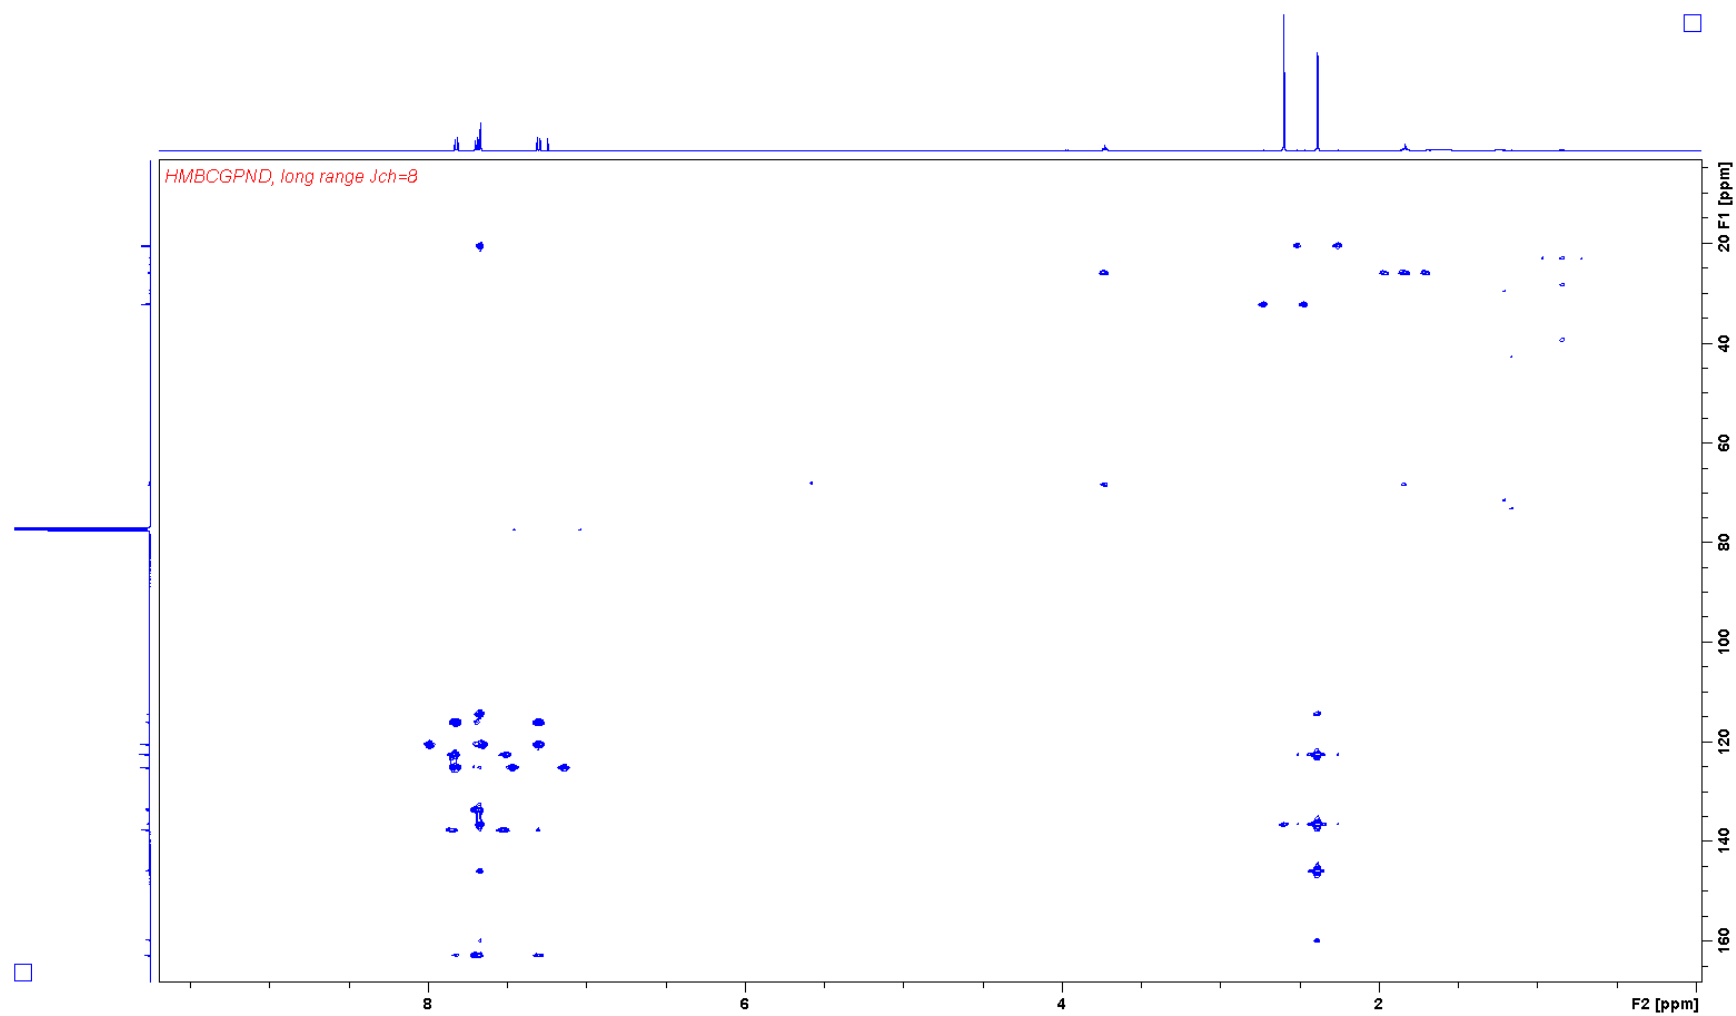

Figure S 33: HMBC NMR spectrum of anthraquinone 296 in DMSO- $d_6$

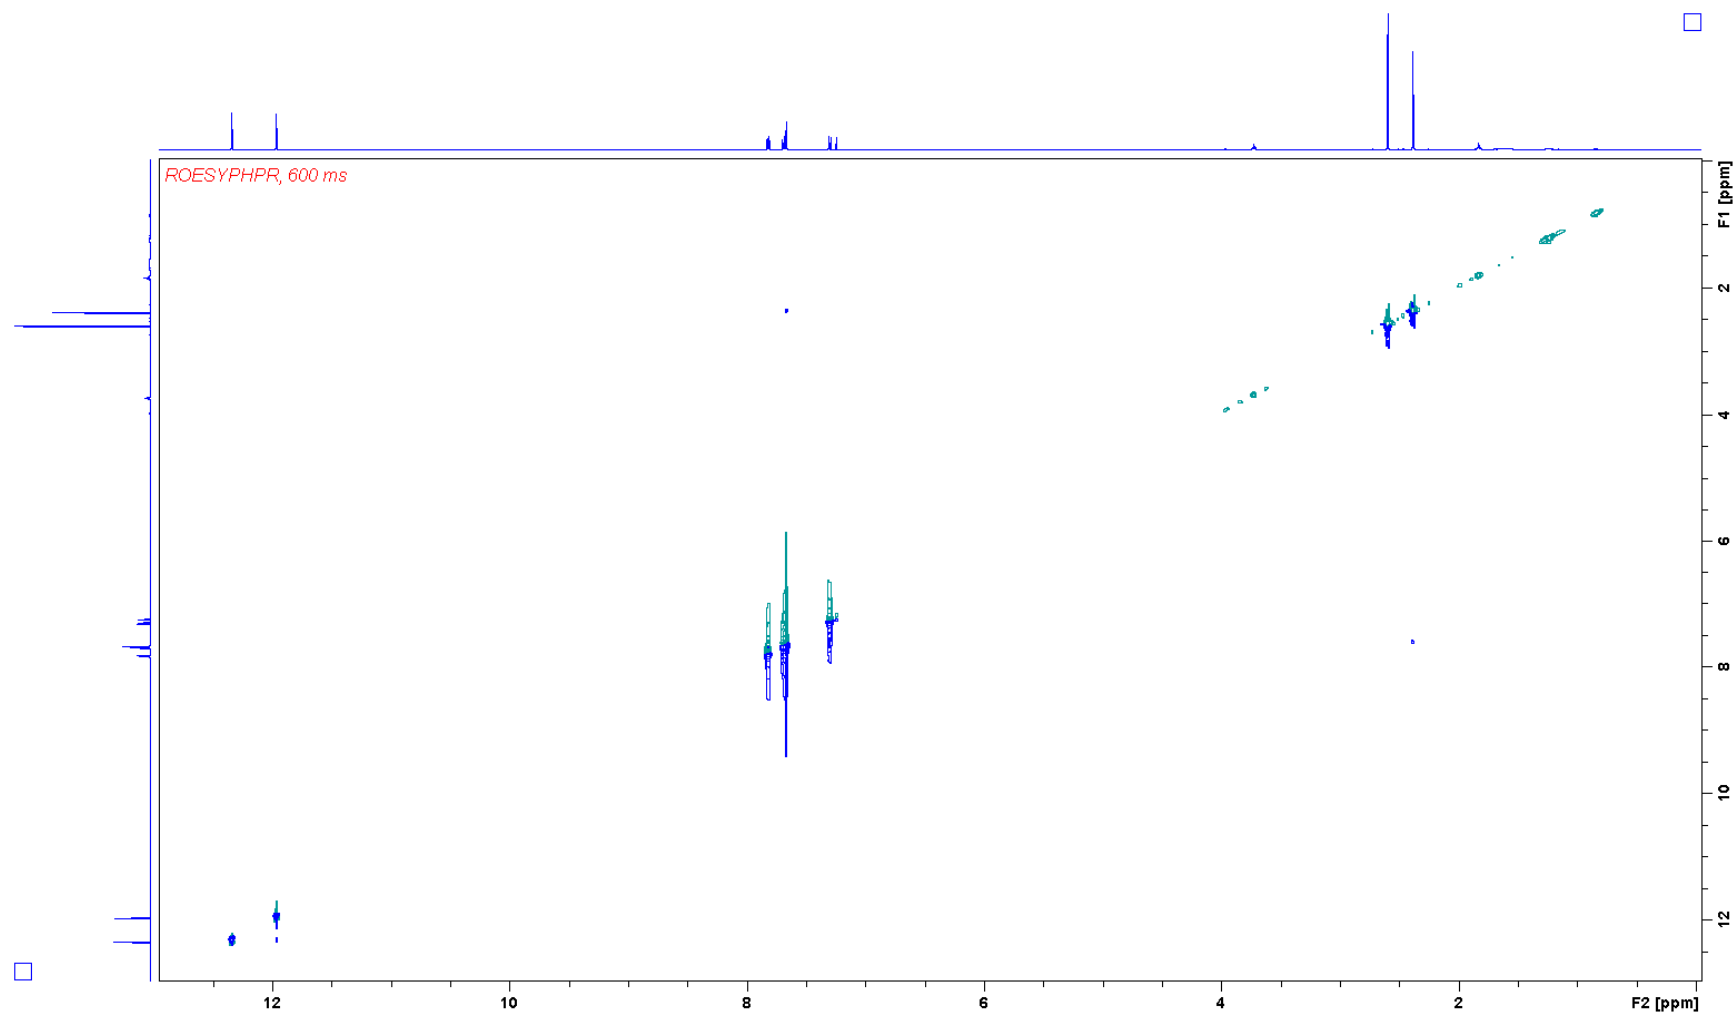

Figure S 34: ROESY NMR spectrum of anthraquinone 296 in DMSO- $d_6$

**Anthraquinone 340**

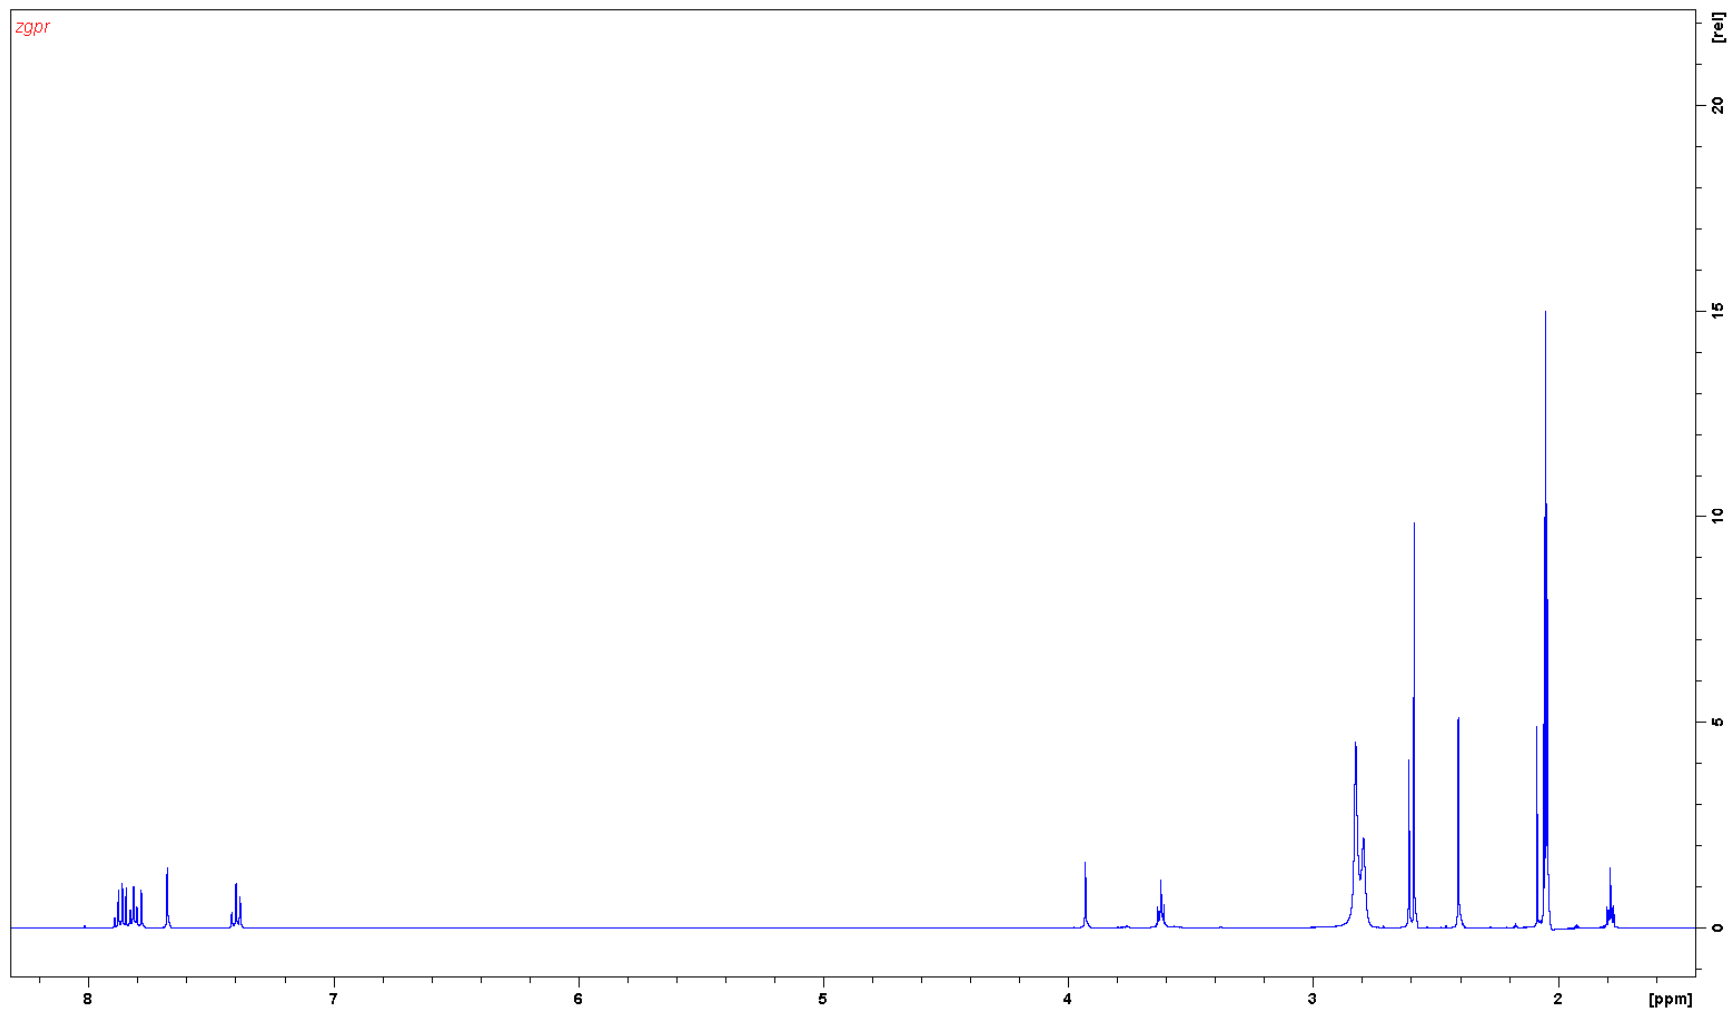

Figure S 35:  $^1\text{H}$  NMR spectrum of anthraquinone 341 in  $\text{Acetone-}d_6$

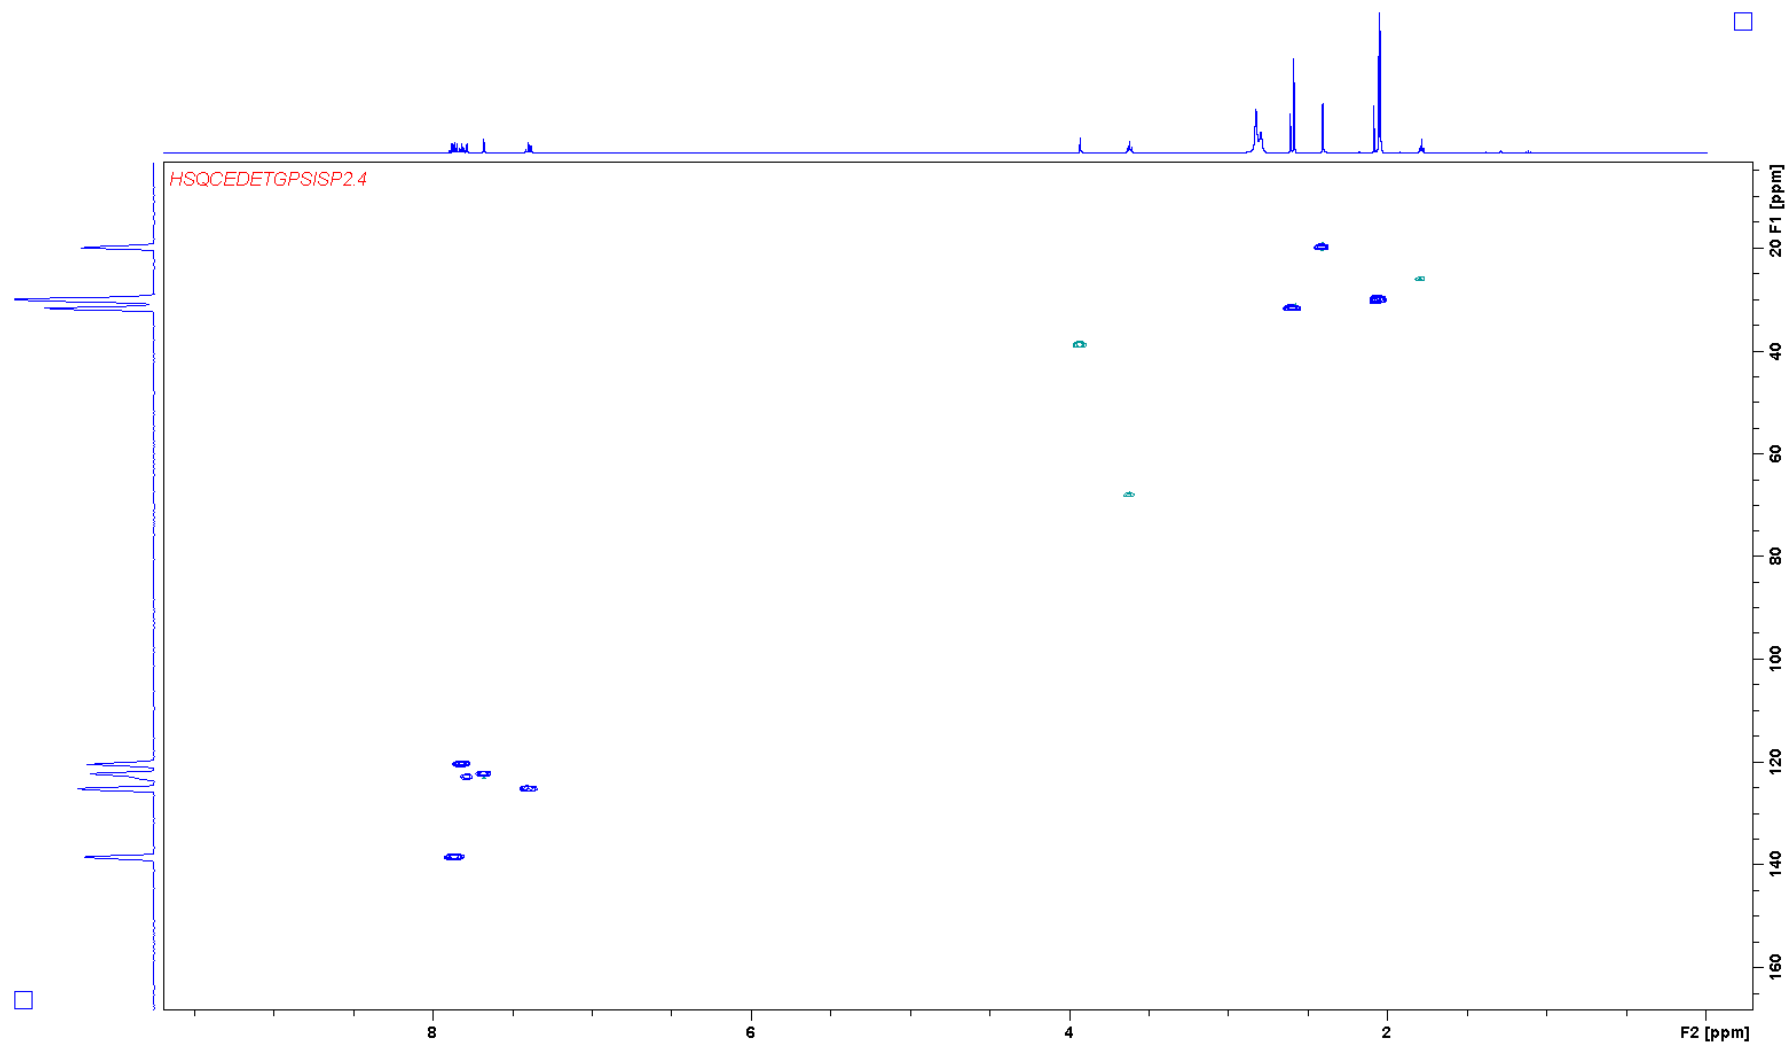

Figure S 36: HSQC NMR spectrum of anthraquinone 341 in Acetone- $d_6$

# Anthraquinone 324

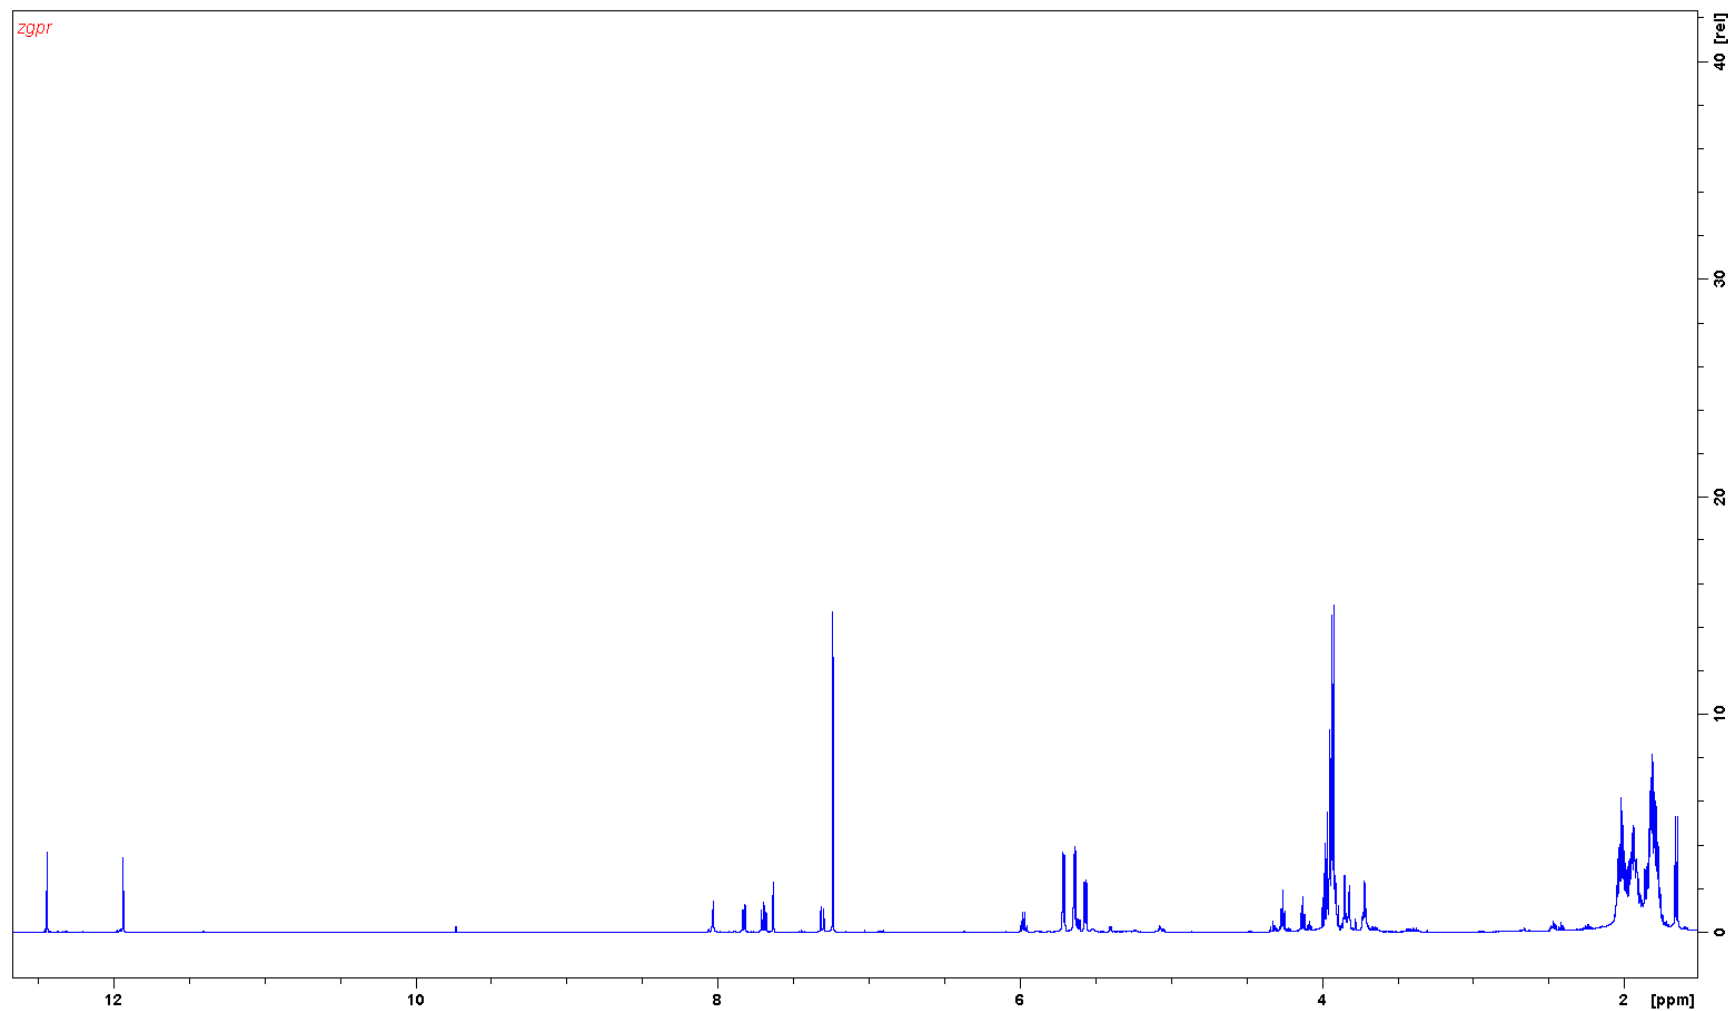

Figure S 37:  $^1\text{H}$  NMR spectrum of anthraquinone 324 in  $\text{CDCl}_3$



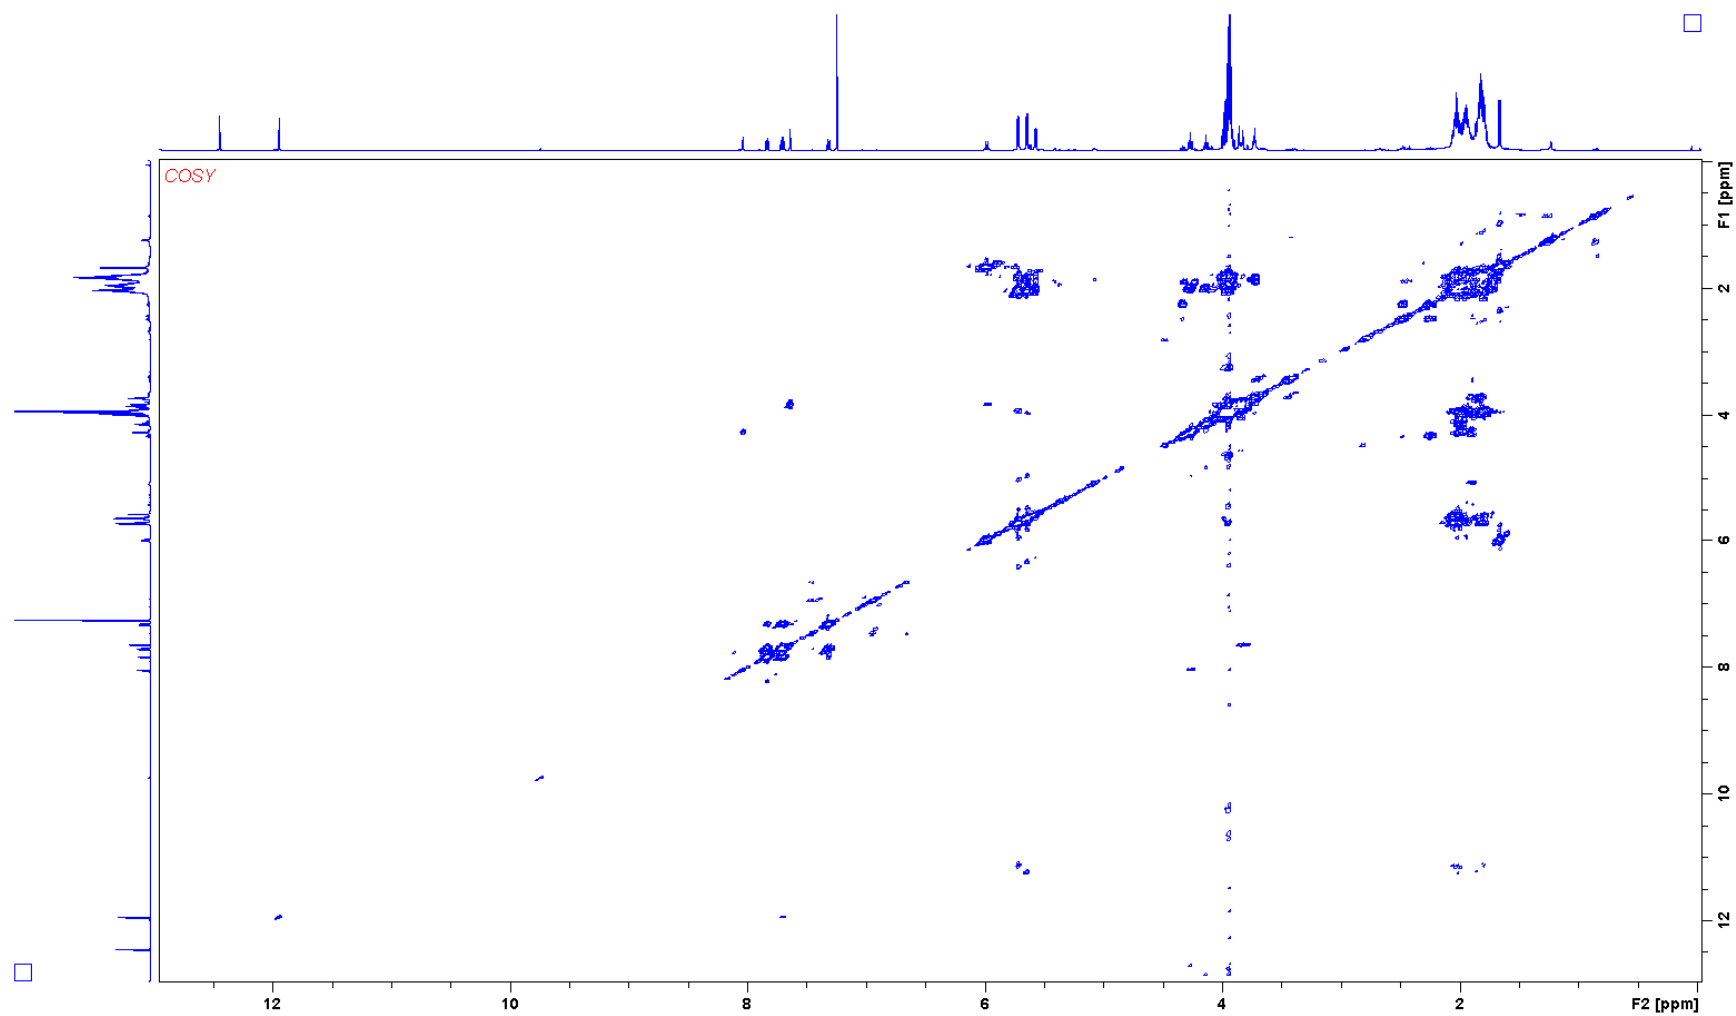

Figure S 38: COSY NMR spectrum of anthraquinone 324 in  $\text{CDCl}_3$

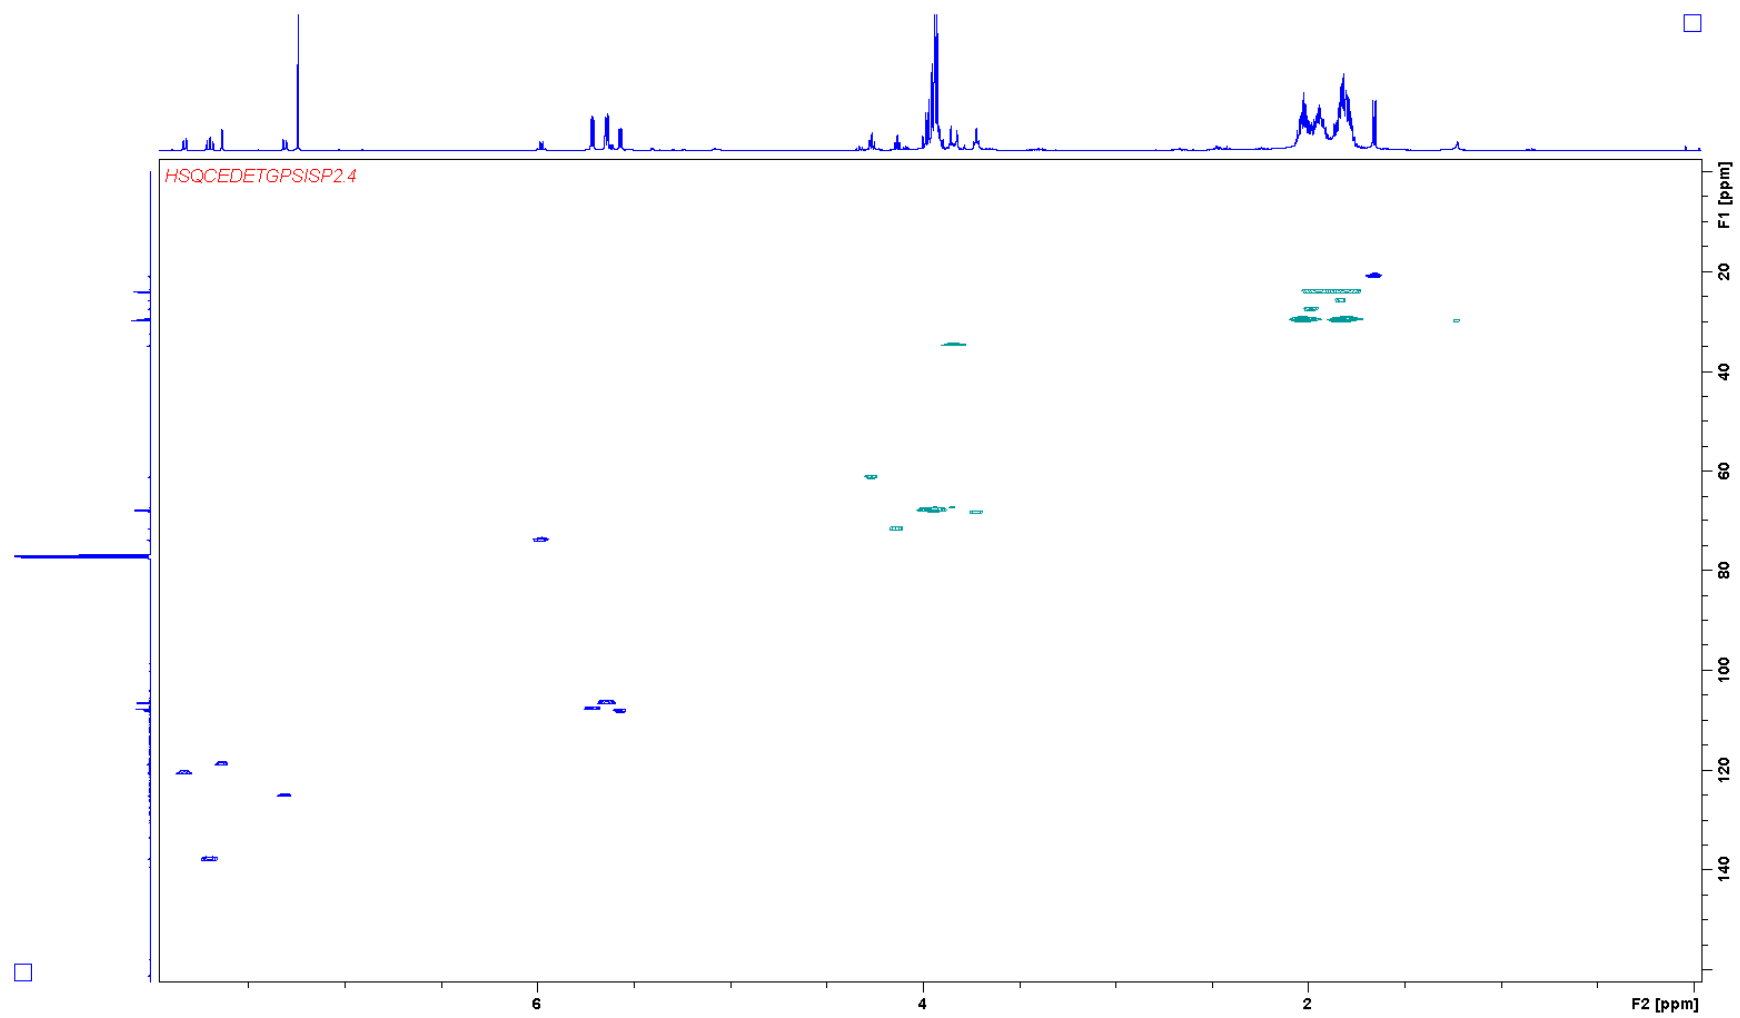

Figure S 39: HSQC NMR spectrum of anthraquinone 324 in  $CDCl_3$

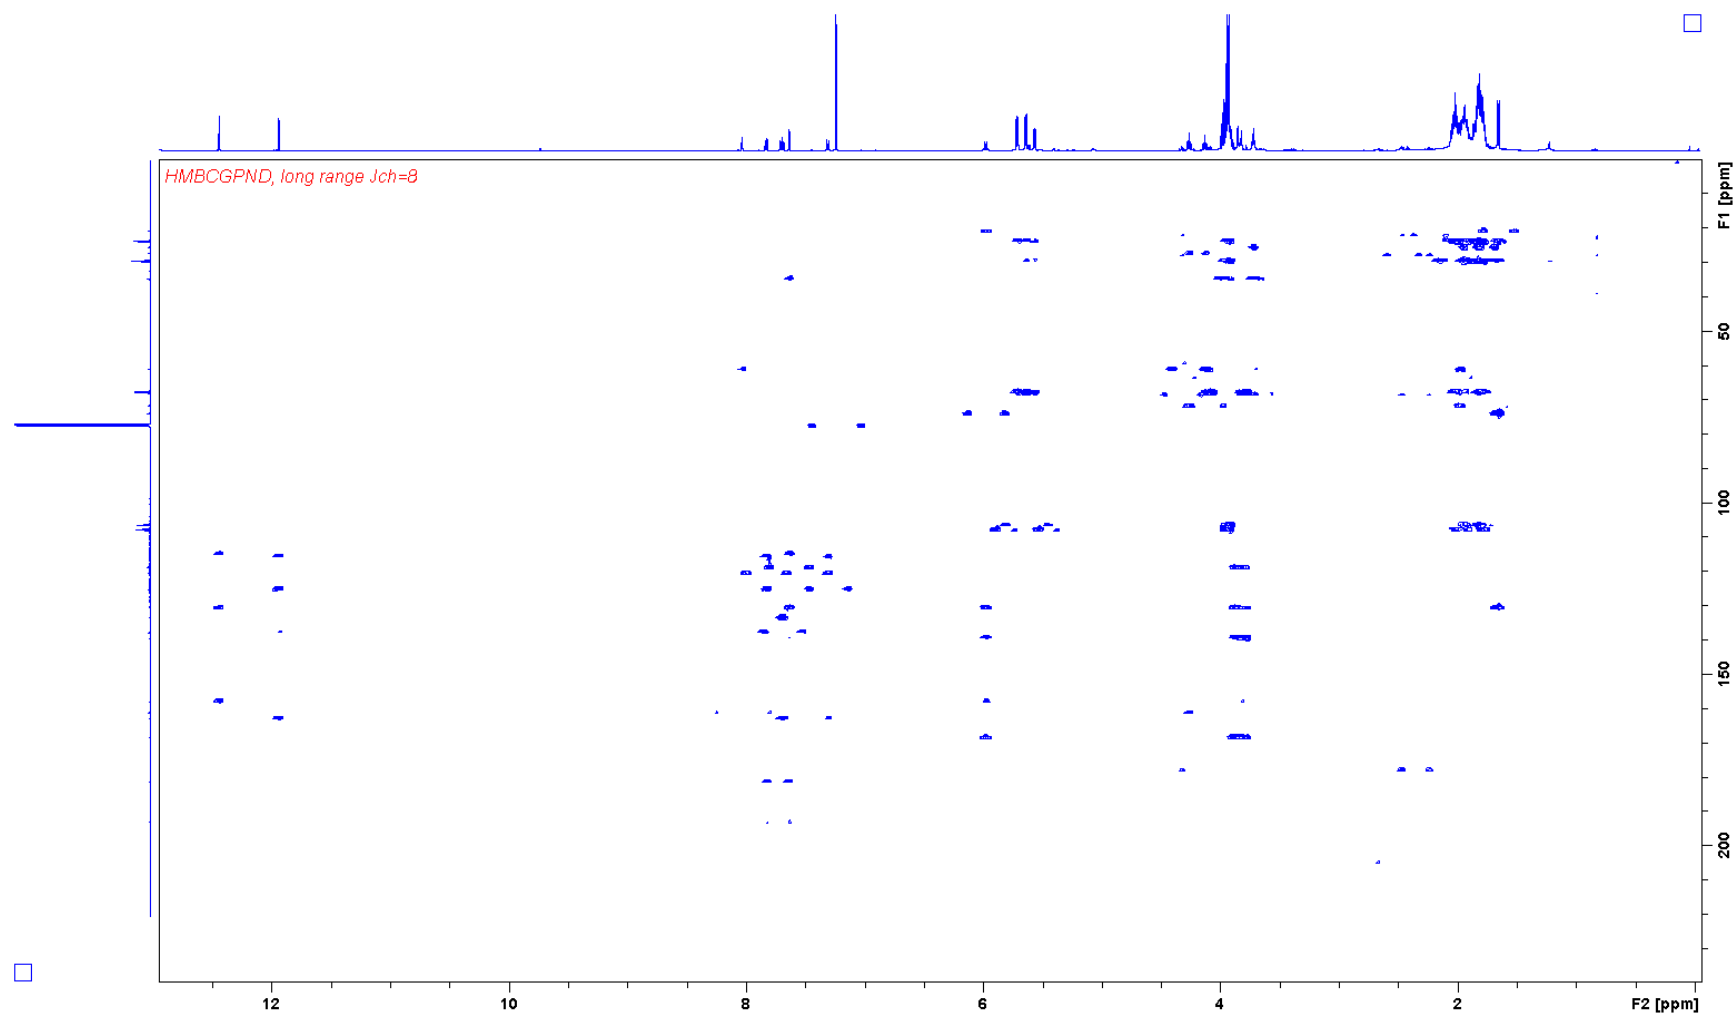

Figure S 40: HMBC NMR spectrum of anthraquinone 324 in CDCl<sub>3</sub>

Pyxidicycline A

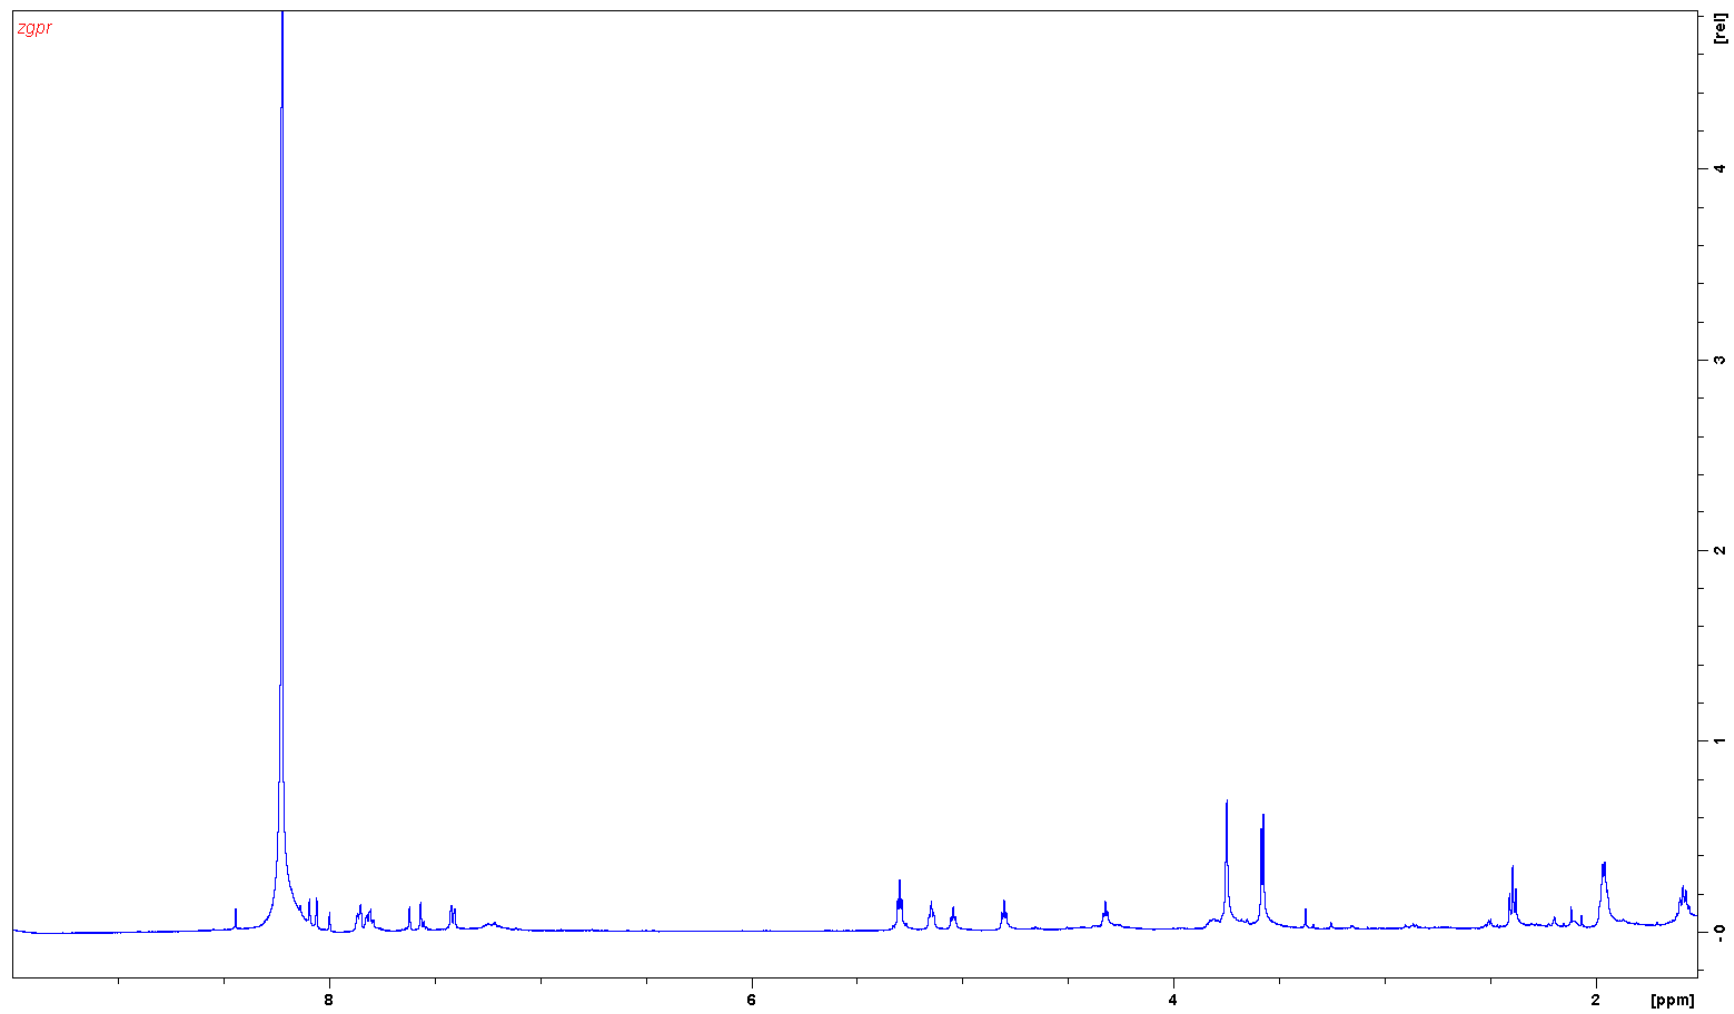

Figure S 41:  $^1\text{H}$  NMR spectrum of pyxidicycline A in formic acid- $d_2$

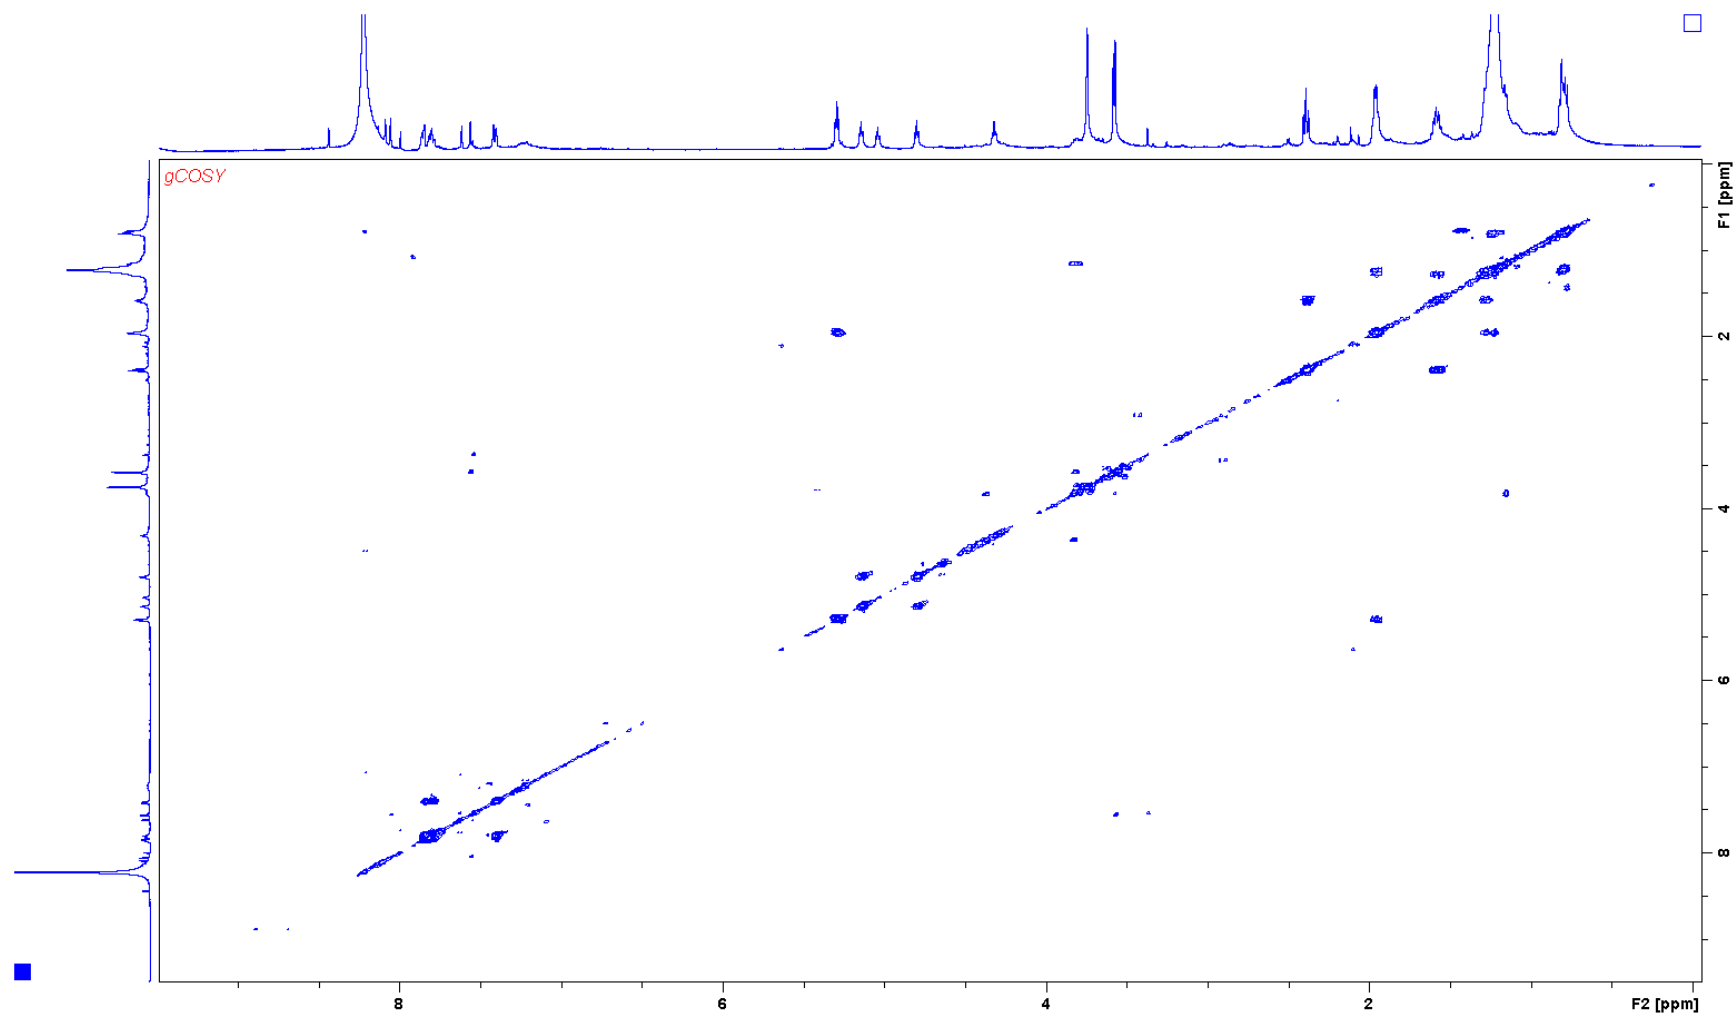

Figure S 42: COSY NMR spectrum of pyxidicycline A in formic acid- $d_2$

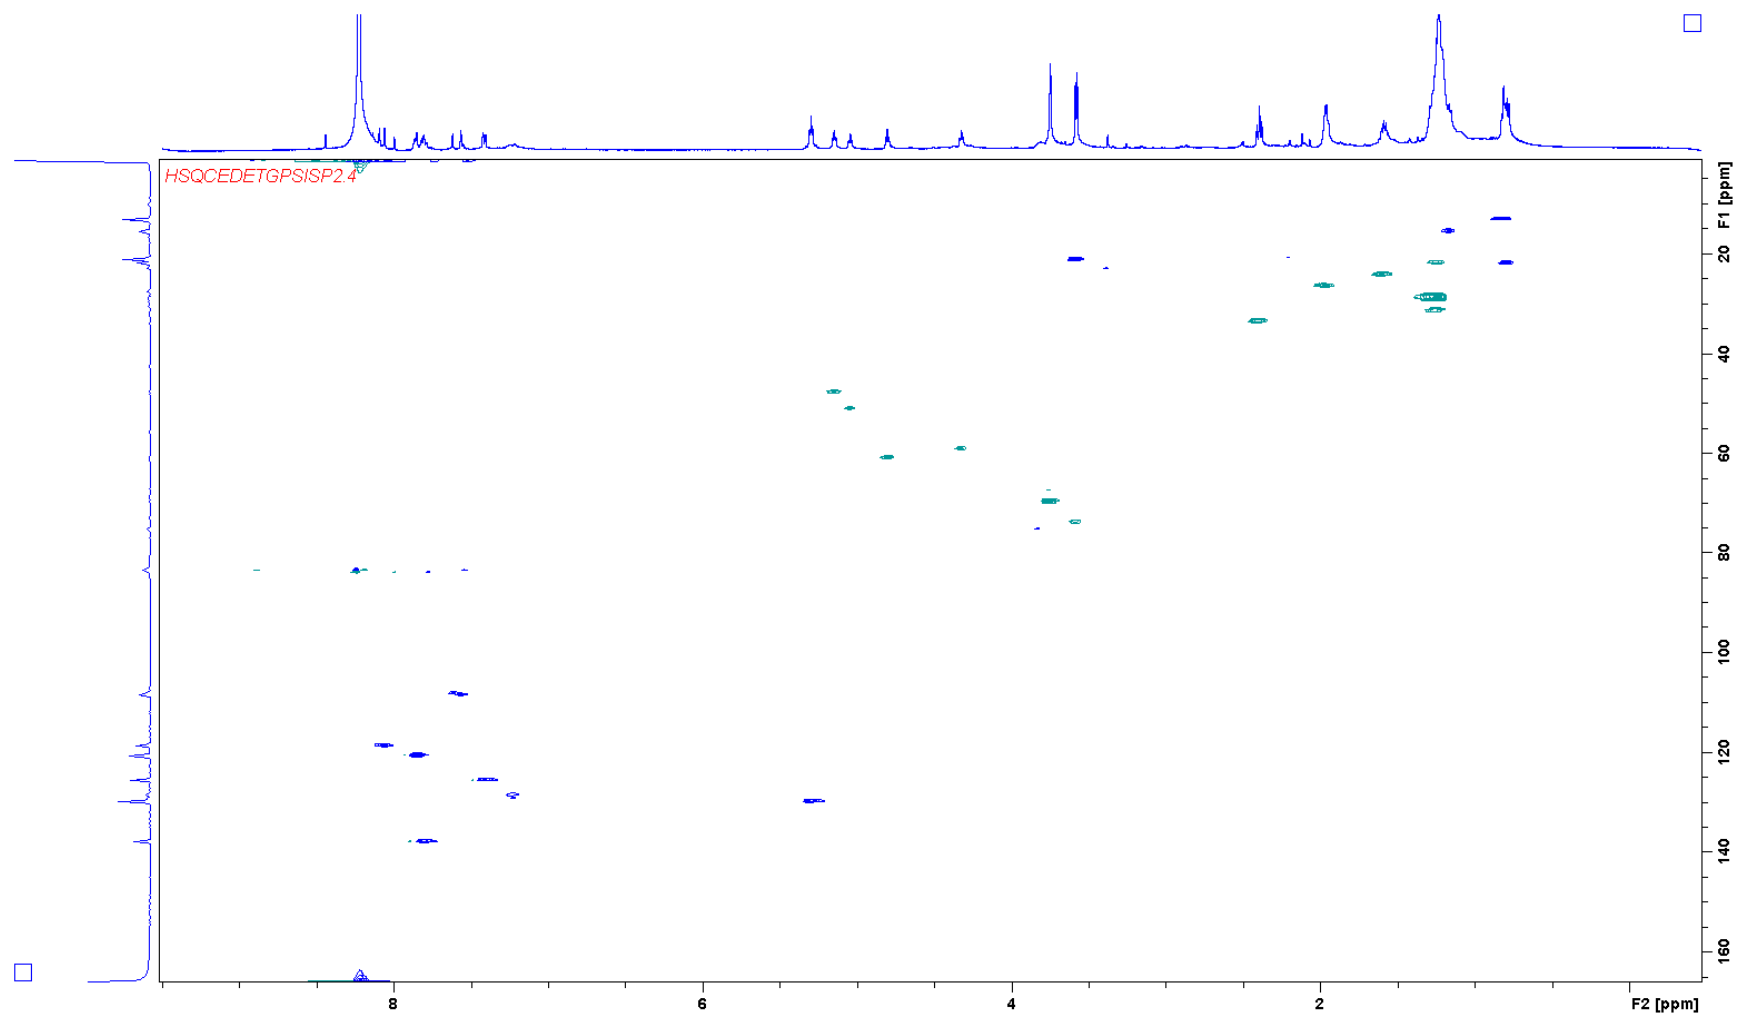

Figure S 43: HSQC NMR spectrum of pyxidicycline A in formic acid- $d_2$

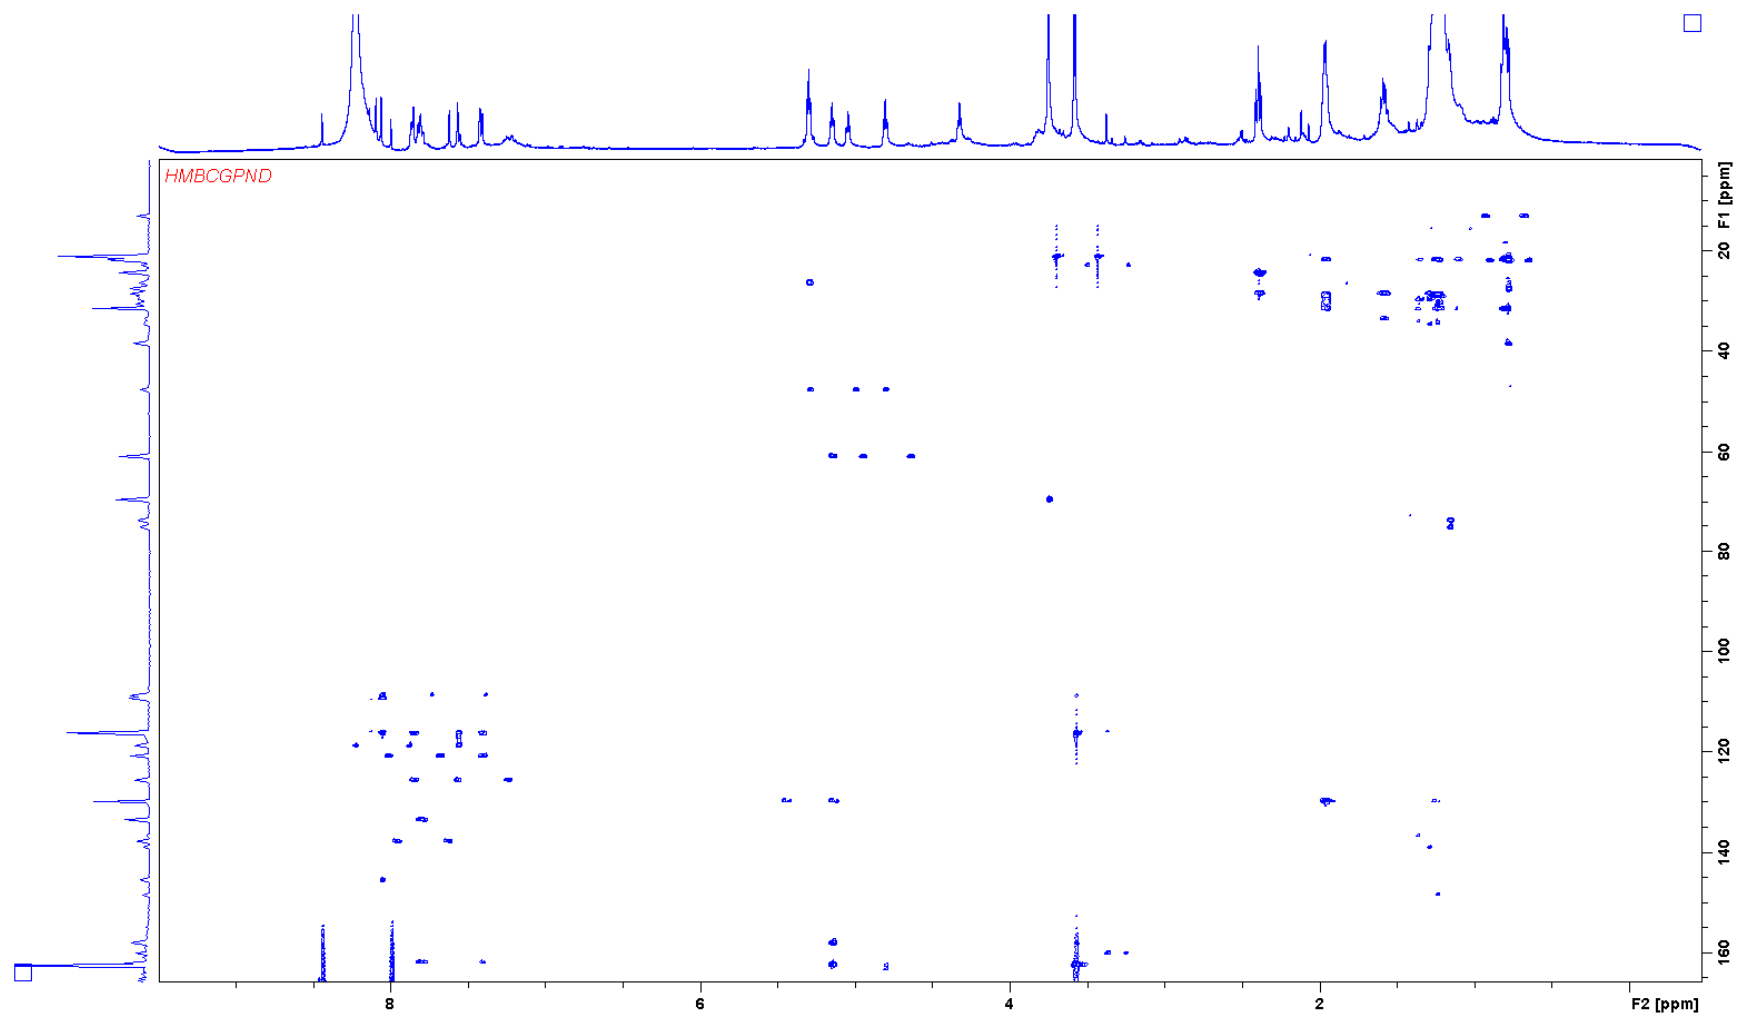

Figure S 44: HMBC NMR spectrum of pyxidicycline A in formic acid-d<sub>2</sub>

Pyxidicycline B

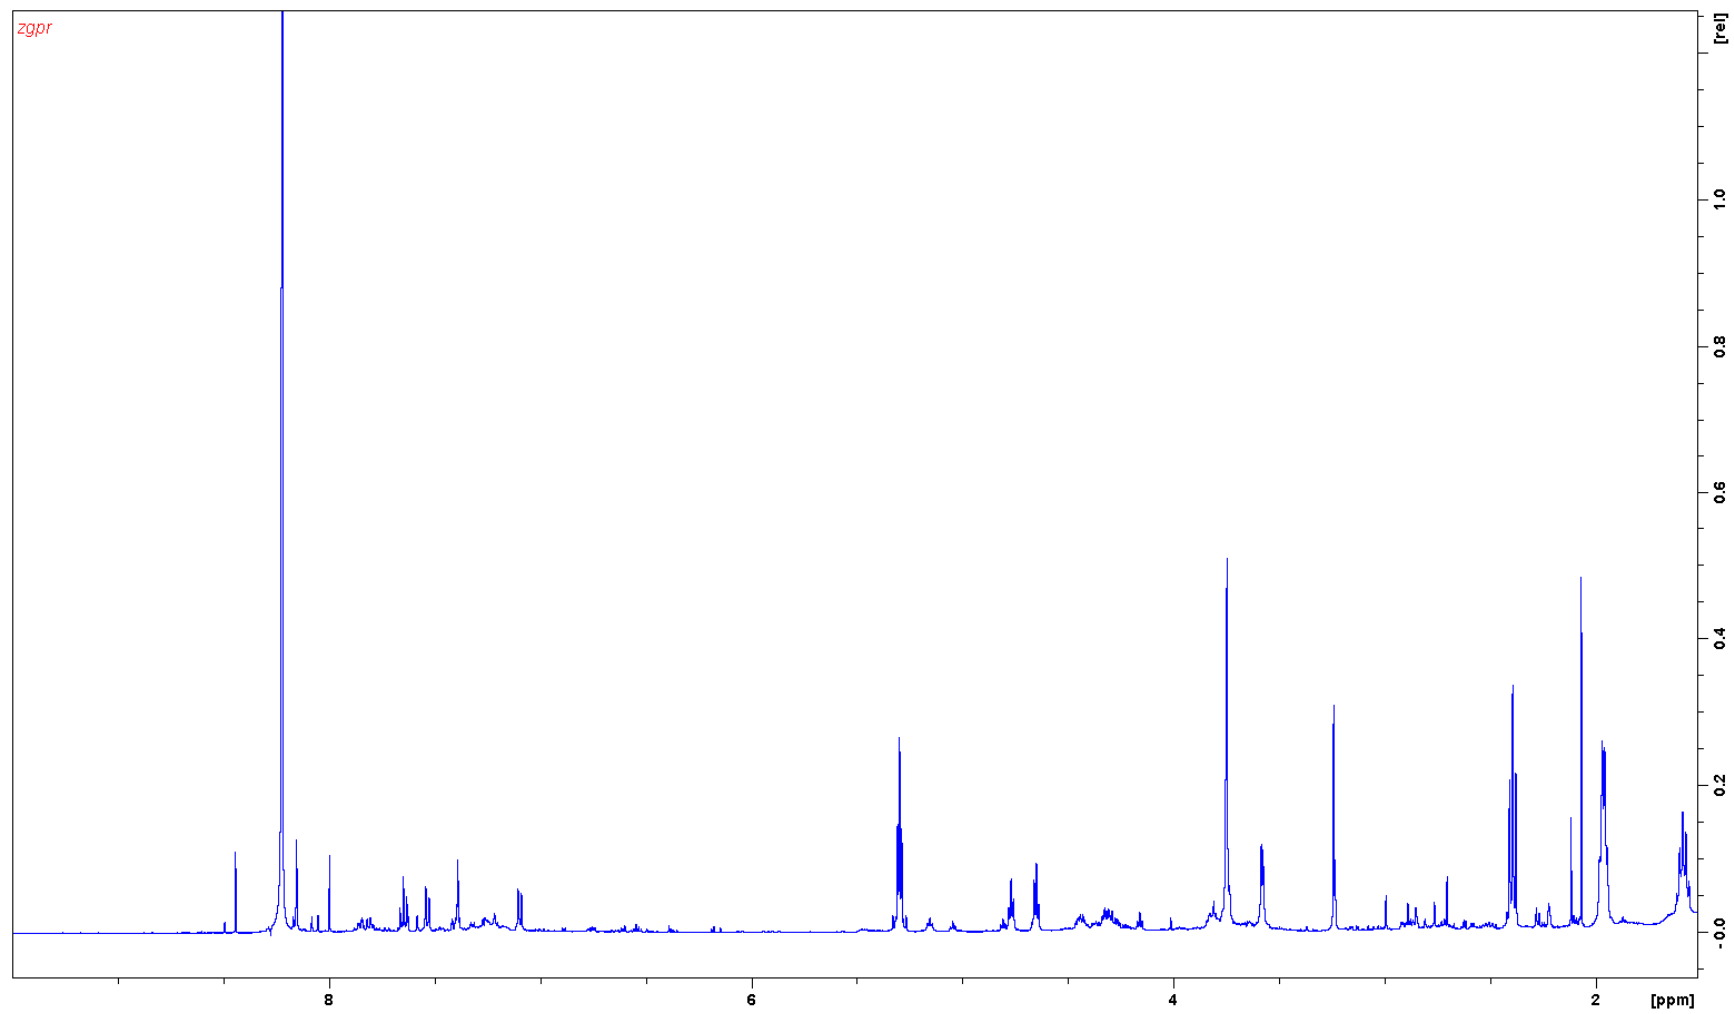

Figure S 45:  $^1\text{H}$  NMR spectrum of pyxidicycline B in formic acid- $d_2$



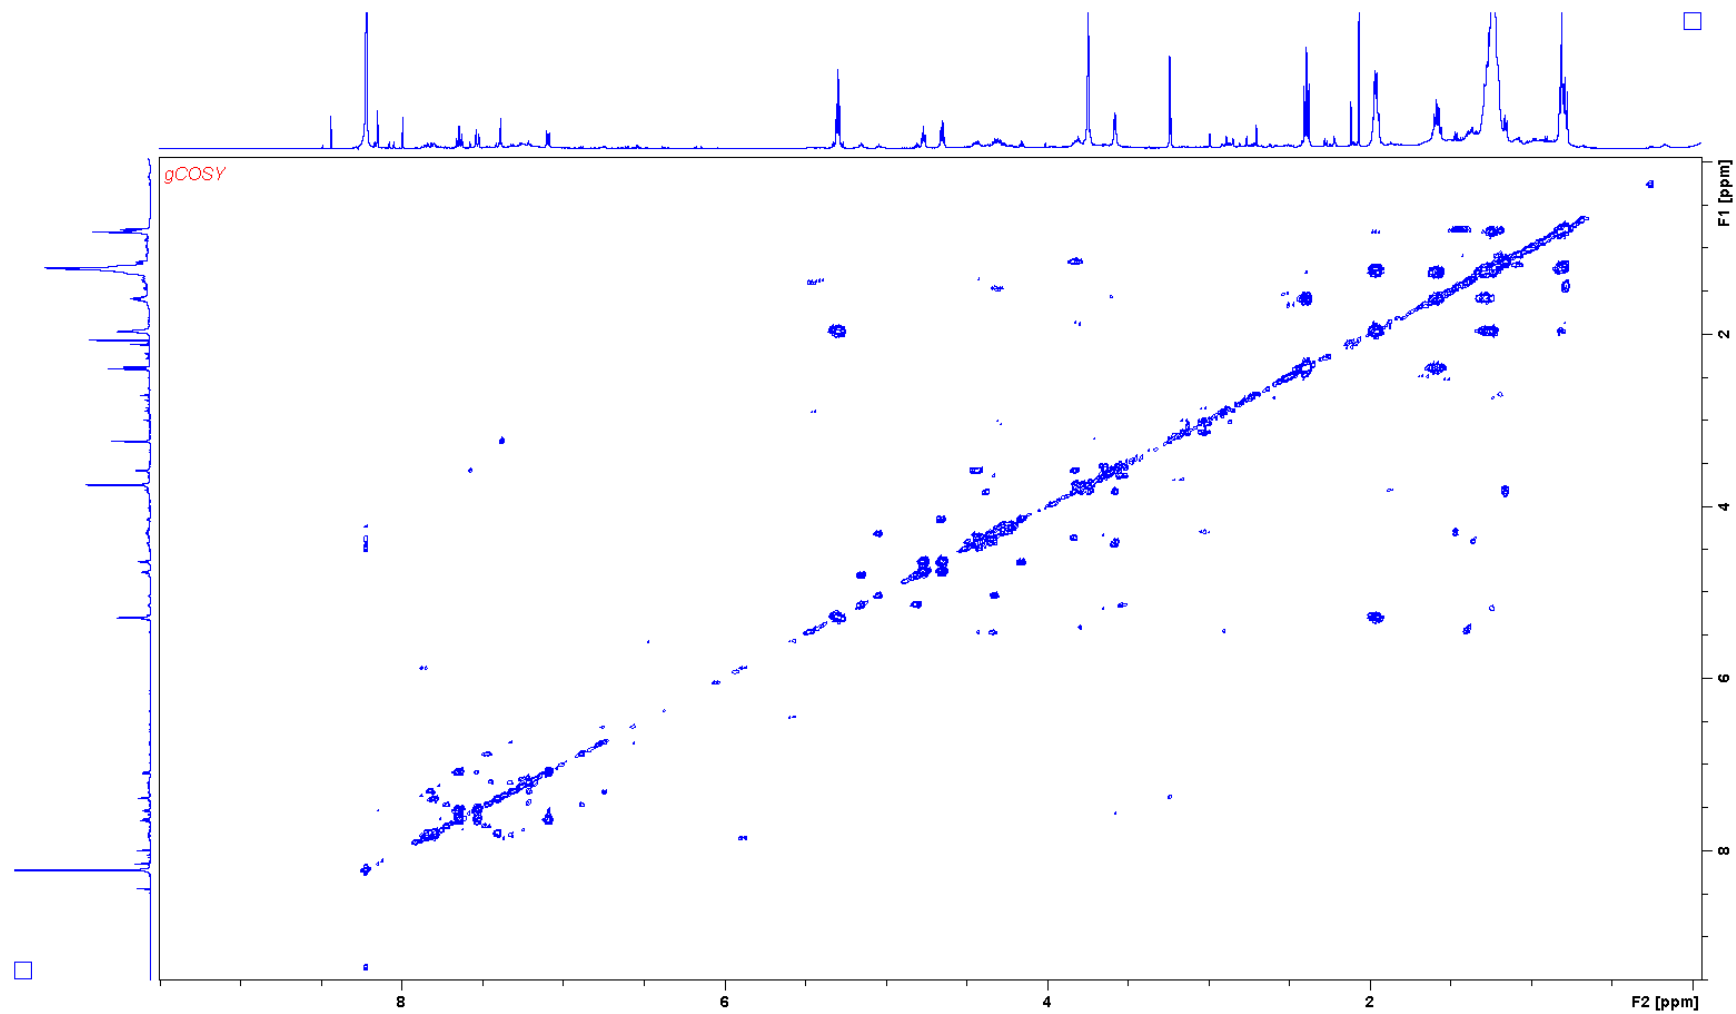

Figure S 46: COSY NMR spectrum of pyxidicycline B in formic acid- $d_2$

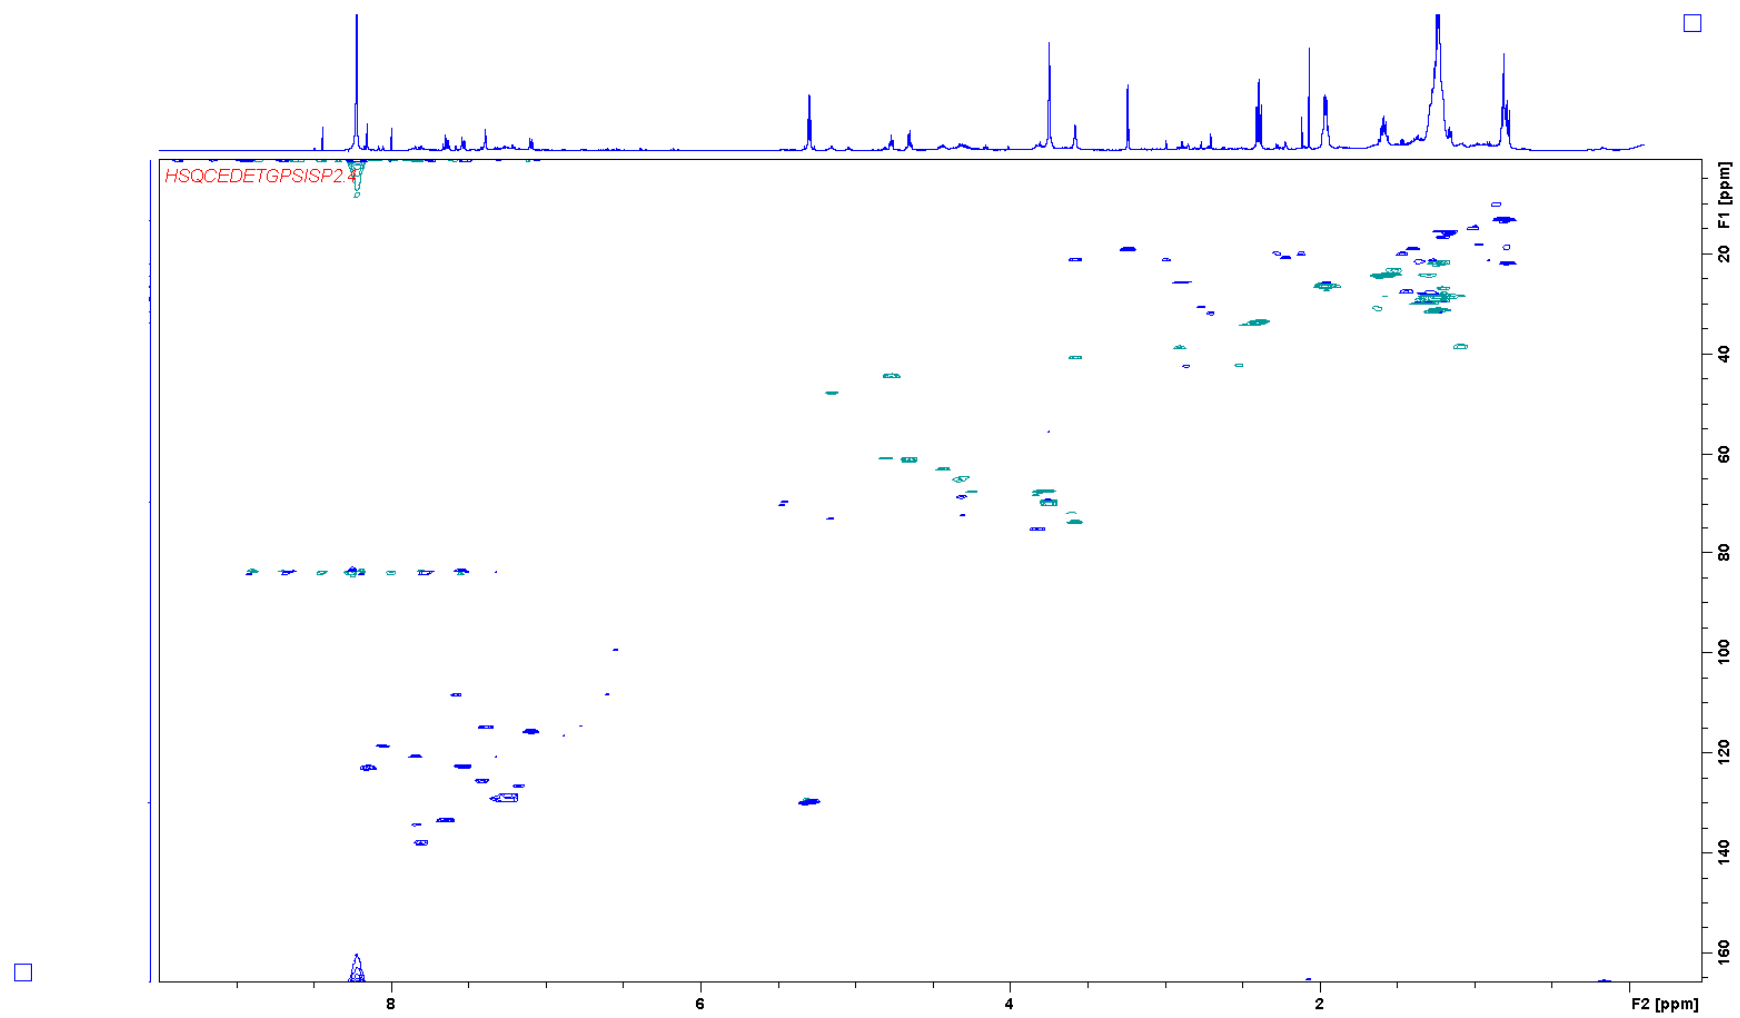

Figure S 47: HSQC NMR spectrum of pyxidicycline B in formic acid- $d_2$

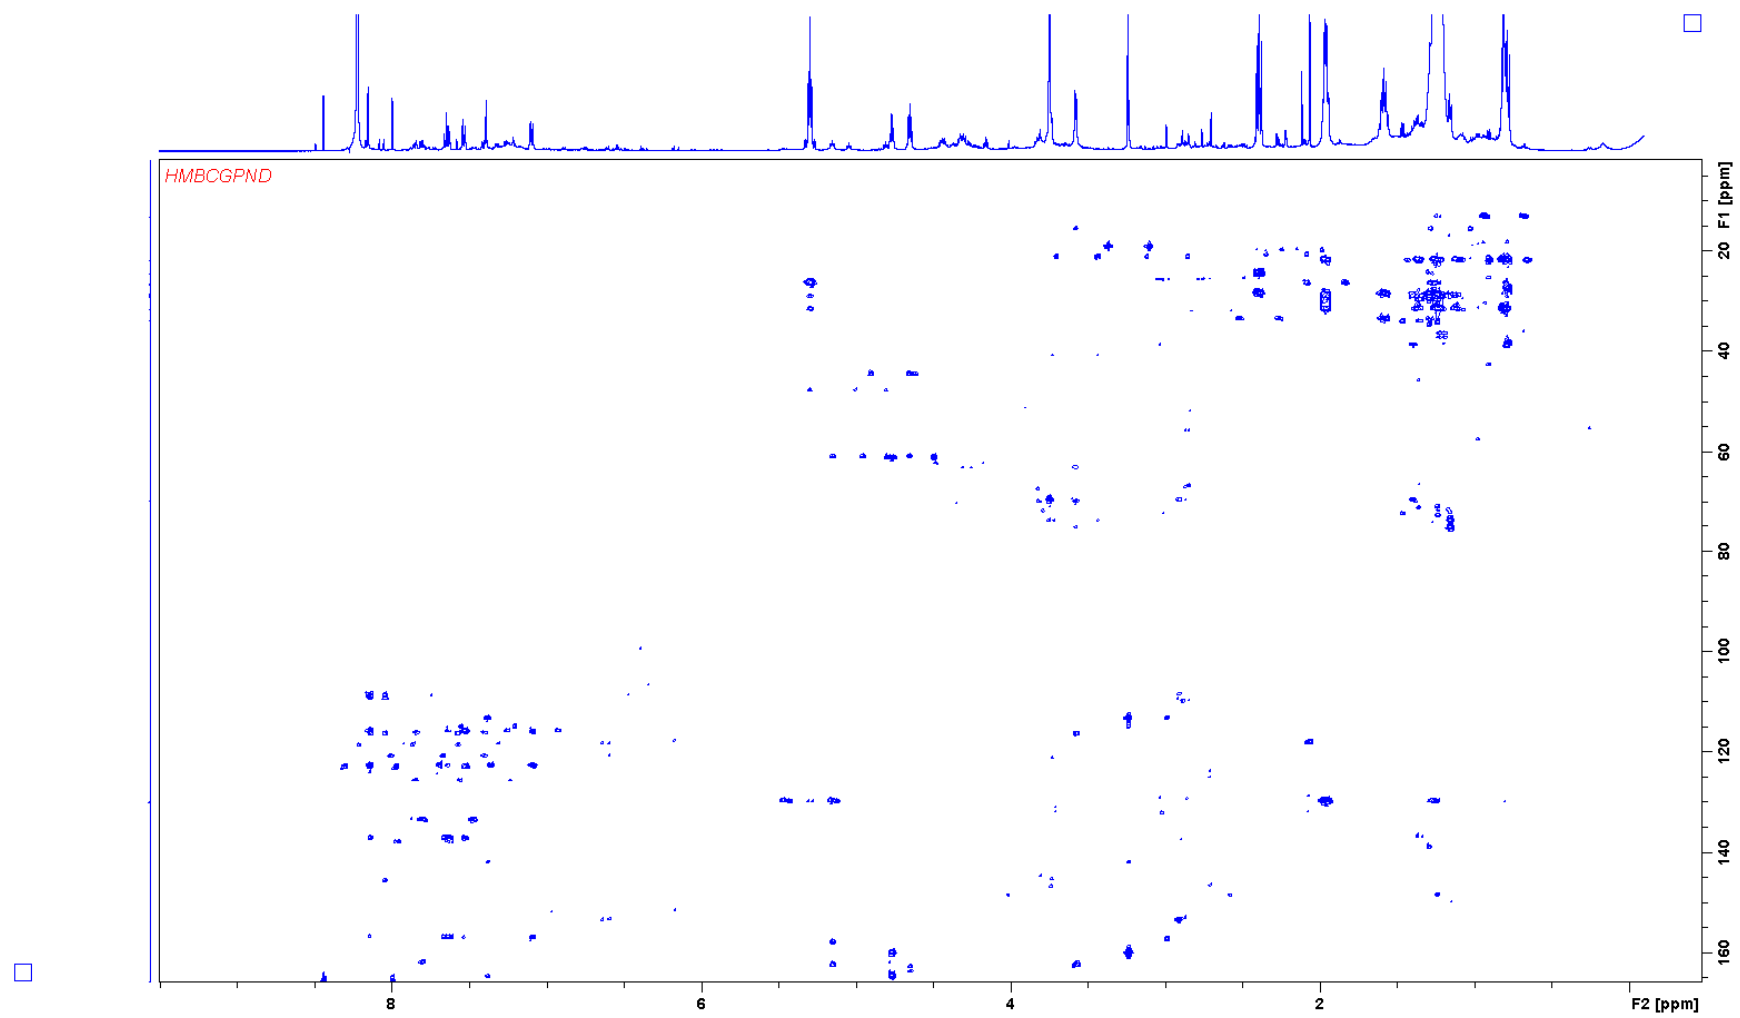

Figure S 48: HMBC NMR spectrum of pyxidicycline B in formic acid- $d_2$

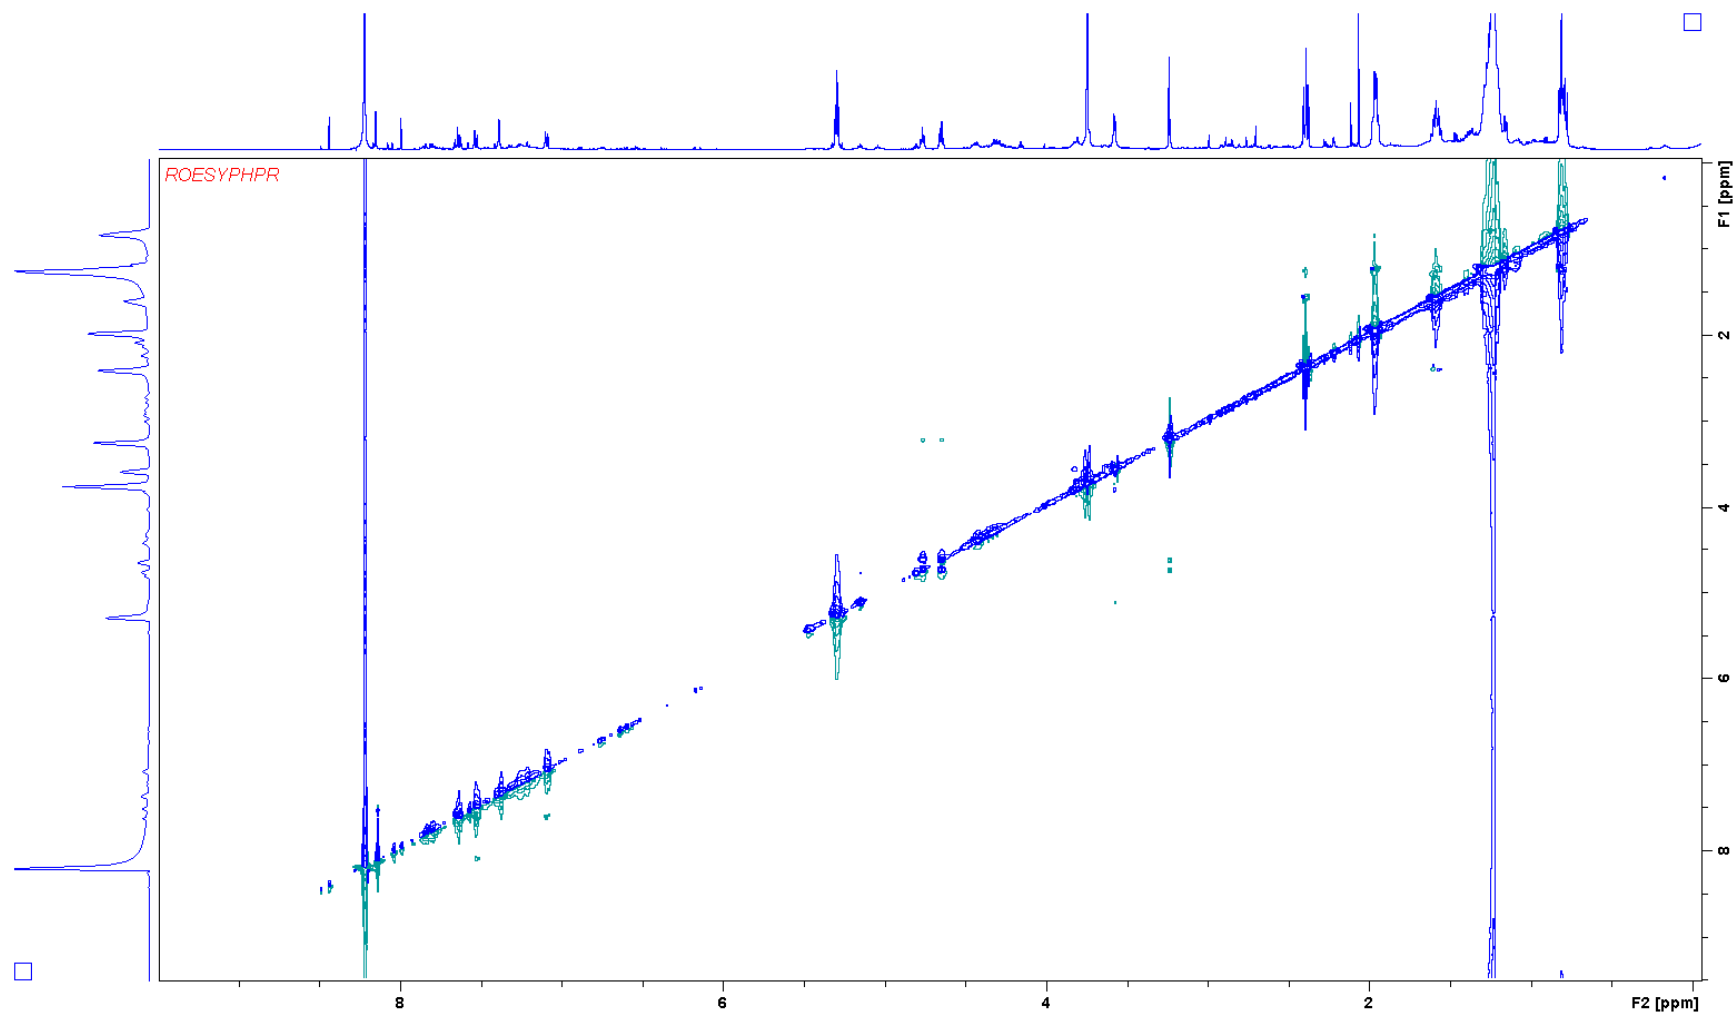

Figure S 49: ROESY NMR spectrum of pyxidicycline B in formic acid- $d_2$

## 6 References

- 1 P. Youderian, N. Burke, D. J. White and P. L. Hartzell, *Mol. Microbiol.*, 2003, **49**, 555.
- 2 O. Bilyk, O. N. Sekurova, S. B. Zotchev and A. Luzhetskyy, *PLoS ONE*, 2016, **11**, e0158682.
- 3 V. Magrini, C. Creighton and P. Youderian, *J. Bacteriol.*, 1999, **181**, 4050.
- 4 S. Shah and J. G. Heddle, *Appl Microbiol Biotechnol*, 2014, **98**, 9545.
- 5 L. A. Kelley, S. Mezulis, C. M. Yates, M. N. Wass and M. J. E. Sternberg, *Nat. Protoc.*, 2015, **10**, 845.
- 6 J. Dreier and C. Khosla, *Biochemistry*, 2000, **39**, 2088.
- 7 A. Marchler-Bauer, Y. Bo, L. Han, J. He, C. J. Lanczycki, S. Lu, F. Chitsaz, M. K. Derbyshire, R. C. Geer, N. R. Gonzales, M. Gwadz, D. I. Hurwitz, F. Lu, G. H. Marchler, J. S. Song, N. Thanki, Z. Wang, R. A. Yamashita, D. Zhang, C. Zheng, L. Y. Geer and S. H. Bryant, *Nucleic acids research*, 2017, **45**, D200-D203.
- 8 R. C. Edgar, *Nucleic acids research*, 2004, **32**, 1792.
- 9 L. B. Pickens and Y. Tang, *J. Biol. Chem.*, 2010, **285**, 27509.
- 10 S. Gullón, C. Olano, M. S. Abdelfattah, A. F. Braña, J. Rohr, C. Méndez and J. A. Salas, *Appl. Environ. Microbiol.*, 2006, **72**, 4172.
- 11 van den Berg, R. A., H. C. Hoefsloot, J. A. Westerhuis, A. K. Smilde and van der Werf, M. J., *BMC Gen.*, 2006, **7**, 142.
- 12 G. M. Sheldrick, *Acta Crystallogr. Sect. A*, 2008, **64**, 112.
- 13 J. R. D. McCormick and E. R. Jensen, *Adv. Ceram. Mater.*, 1968, **90**, 7126.
- 14 W. Zhang, Y. Li and Y. Tang, *Proc. Natl. Acad. Sci. USA*, 2008, **105**, 20683.
- 15 V. Prikrylova, M. Podojil, P. Sedmera, J. Vokoun, Z. Vanek and C. H. Hassal, *J Antibiot (Tokyo)*, 1978, **31**, 855.
- 16 R. E. Hoffman, *Magnetic resonance in chemistry : MRC*, 2006, **44**, 606.
